# Supplementary material for: Impact of Maternal Obesity on Liver Disease in the Offspring: A Comprehensive Transcriptomic Analysis and Confirmation of Results in a Murine Model
Source: Biomedicines. 2022 Jan 27;10(2):294. doi: 10.3390/biomedicines10020294 (PMC8869223; doi:10.3390/biomedicines10020294)
Supplement: Supplementary file 1 [file biomedicines-10-00294-s001.zip]

Archive with 8 entries (8 files):
- Index of Supplementary Files.pdf
- Supplementary Figures.pdf
- Supplementary Table S1_Pathways.pdf
- Supplementary Table S2_Genes.pdf
- Supplementary Table S3_Primers.pdf
- Supplementary Table S4_TopDifferentiallyExpressedGenes.csv
- Supplementary Table S5_ExpressionGenesOfInterest.pdf
- Supplementary Table S6_CompleteDataset.csv
