# Supplementary material for: Impact of Maternal Obesity on Liver Disease in the Offspring: A Comprehensive Transcriptomic Analysis and Confirmation of Results in a Murine Model
Source: Biomedicines. 2022 Jan 27;10(2):294. doi: 10.3390/biomedicines10020294 (PMC8869223; doi:10.3390/biomedicines10020294)
Supplement: Supplementary file 1 [file biomedicines-10-00294-s001.zip › Index of Supplementary Files.pdf]

## **Index of supplementary files**

|                                 |                                                                                         |
|---------------------------------|-----------------------------------------------------------------------------------------|
| <b>Supplementary figure S1:</b> | Prism search flow                                                                       |
| <b>Supplementary figure S2:</b> | Gene identification search flow                                                         |
| <b>Supplementary figure S3:</b> | All genes assessed by quantitative real-time quantitative PCR                           |
| <b>Supplementary table S1:</b>  | Table with relevant pathways for NAFLD progression                                      |
| <b>Supplementary table S2:</b>  | Table with relevant previously identified genes and targets for NAFLD progression       |
| <b>Supplementary table S3:</b>  | List of primers used in this study                                                      |
| <b>Supplementary table S4:</b>  | Dysregulated genes, annotated in Reactome                                               |
| <b>Supplementary table S5:</b>  | Expression of previously identified molecular targets involved in chronic liver disease |
| <b>Supplementary table S6:</b>  | Complete data frame with all genes for all studies                                      |
