# Supplementary material for: Impact of Maternal Obesity on Liver Disease in the Offspring: A Comprehensive Transcriptomic Analysis and Confirmation of Results in a Murine Model
Source: Biomedicines. 2022 Jan 27;10(2):294. doi: 10.3390/biomedicines10020294 (PMC8869223; doi:10.3390/biomedicines10020294)
Supplement: Supplementary file 1 [file biomedicines-10-00294-s001.zip › Supplementary Table S2_Genes.pdf]

**Supplementary Table S2**

| <b>Symbol</b>  | <b>Human analog</b> | <b>Aliases</b> | <b>Protein Name</b>                        | <b>Biological Process</b>      | <b>Function</b>                                                                                 |
|----------------|---------------------|----------------|--------------------------------------------|--------------------------------|-------------------------------------------------------------------------------------------------|
| <i>Adipoq</i>  | <i>ADIPOQ</i>       |                | Adiponectin                                | Lipid metabolism               | Metabolic and hormonal processes                                                                |
| <i>Apoa4</i>   | <i>APOA4</i>        |                | Apolipoprotein A4                          |                                | Chylomicrons, VLDL                                                                              |
| <i>Casp6</i>   | <i>CASP6</i>        |                | Caspase 6                                  | Apoptosis                      | Cell apoptosis and programmed cell death                                                        |
| <i>Ccl2</i>    | <i>CCL2</i>         | <i>MCP1</i>    | Monocyte Chemoattractant Protein 1         |                                | Disease with monocytic infiltration                                                             |
| <i>Col13a1</i> | <i>COL13A1</i>      |                | Collagen alpha-1(XIII) chain               |                                | Regulates oxidative stress, inflammation and fibrogenesis                                       |
| <i>Cpt1a</i>   | <i>CPT1A</i>        |                | Carnitine O-palmitoyltransferase 1         | Lipid metabolism               | Catalyzes the transfer of the acyl group of long-chain fatty acid-CoA conjugates onto carnitine |
| <i>Fasn</i>    | <i>FASN</i>         |                | Fatty acid synthase                        | Lipid metabolism               | catalyzes the de novo biosynthesis of long-chain saturated fatty acids                          |
| <i>Fgf19</i>   | <i>FGF19</i>        |                | Fibroblast growth factor 19                | Bile acid synthesis            | Hormone that regulates bile acid synthesis                                                      |
| <i>Fgf21</i>   | <i>FGF21</i>        |                | Fibroblast growth factor 21                | Carbohydrate metabolism        | Important hepatokine with a multitude of metabolic functions                                    |
| <i>Fgfr1</i>   | <i>FGFR1</i>        |                | Fibroblast growth factor receptor 1        | Growth factor receptor binding | Tyrosine-protein kinase that acts as cell-surface receptor for fibroblast growth factors        |
| <i>Gckr</i>    | <i>GCKR</i>         |                | Glucokinase regulatory protein             | Carbohydrate metabolism        | Regulates glucokinase by forming an inactive complex with this enzyme                           |
| <i>Igfbp1</i>  | <i>IGFBP1</i>       |                | Insuline like groth factor binding protein | Growth factor binding          | Interacts with IGF, prolongs its halflife                                                       |

|               |               |                       |                                                        |                                 |                                                                                                     |
|---------------|---------------|-----------------------|--------------------------------------------------------|---------------------------------|-----------------------------------------------------------------------------------------------------|
| <i>Lep</i>    | <i>LEP</i>    |                       | Leptin                                                 | Energy homeostasis              | Key player in the regulation of energy balance and body weight control                              |
| <i>Lepr</i>   | <i>LEPR</i>   |                       | Leptin receptor                                        | Energy homeostasis              | Receptor for leptin                                                                                 |
| <i>Mertk</i>  | <i>MERTK</i>  |                       | Tyrosine-protein kinase Mer                            | Innate immunity                 | Innate immunity, HSC activation                                                                     |
| <i>Mlxipl</i> | <i>MLXIPL</i> | <i>ChREBP</i>         | Carbohydrate-responsive element-binding protein        | Energy homeostasis              | Transcriptional repressor. Binds to the canonical and non-canonical E box sequences                 |
| <i>Moxd1</i>  | <i>MOXD1</i>  |                       | DBH-like monooxygenase protein 1                       | Octopamine biosynthetic process | Catalyzes the conversion of dopamine to norepinephrine                                              |
| <i>Mtarc1</i> | <i>MTARC1</i> |                       | Mitochondrial amidoxime-reducing component 1           | Nitrate metabolic process       | Catalyzes the reduction of N-oxygenated molecules                                                   |
| <i>Mttp</i>   | <i>MTTP</i>   |                       | Microsomal triglyceride transfer protein large subunit | Lipid metabolism                | Required for the assembly and secretion of plasma lipoproteins                                      |
| <i>Nr1d1</i>  | <i>NR1D1</i>  | <i>Rev-ErbA-Alpha</i> | Nuclear receptor subfamily 1 group D member 1          | Biological rhythms              | Transcriptional repressor, circadian Rhythm, various metabolic pathways                             |
| <i>Nr1h4</i>  | <i>NR1H4</i>  | <i>FXR, Fxr</i>       | Bile acid receptor                                     | Bile acid metabolism            | Receptor for bile acids such as chenodeoxycholic acid, lithocholic acid and allocholic acid.        |
| <i>Pck1</i>   | <i>PCK1</i>   |                       | Phosphoenolpyruvate carboxykinase                      | Gluconeogenesis                 | Regulation of gluconeogenesis                                                                       |
| <i>Pnpla3</i> | <i>PNPLA3</i> |                       | 1-acylglycerol-3-phosphate O-acyltransferase           | Lipid metabolism                | Potentiates profibrogenic and pro-inflammatory features of HSCs, increases hepatic lipid content    |
| <i>Ppara</i>  | <i>PPARA</i>  |                       | Peroxisome proliferator-activated receptor alpha       | Transcription regulation        | Key regulator of lipid metabolism. Regulates the peroxisomal beta-oxidation pathway of fatty acids. |

|                  |                  |                     |                                                                      |                                  |                                                                                                                                   |
|------------------|------------------|---------------------|----------------------------------------------------------------------|----------------------------------|-----------------------------------------------------------------------------------------------------------------------------------|
| <i>Ppard</i>     | <i>PPARD</i>     | <i>PPAR-Beta</i>    | Peroxisome proliferator-activated receptor delta                     | Transcription regulation         | Transcription factor, exercise mimetics, beta-catenin pathway                                                                     |
| <i>Pparg</i>     | <i>PPARG</i>     |                     | Peroxisome proliferator-activated receptor gamma                     | Transcription regulation         | Nuclear receptor that binds peroxisome proliferators such as hypolipidemic drugs and fatty acids.                                 |
| <i>Ppargc1a</i>  | <i>PPARGC1A</i>  | <i>PGC1a</i>        | Peroxisome proliferator-activated receptor gamma coactivator 1-alpha | Transcription regulation         | Transcriptional coactivator for steroid receptors and nuclear receptors. Greatly increases the transcriptional activity of PPARG. |
| <i>Rxra</i>      | <i>RXRA</i>      |                     | Retinoic acid receptor                                               | Transcription regulation         | Receptor for retinoic acid that acts as a transcription factor                                                                    |
| <i>Saa1</i>      | <i>SAA1</i>      |                     | Serum amyloid A-1 protein                                            | Acute phase                      | Major acute phase protein                                                                                                         |
| <i>Scd1</i>      | <i>SCD1</i>      |                     | Acyl-CoA desaturase 1                                                | Lipid metabolism                 | Plays an important role in lipid biosynthesis                                                                                     |
| <i>Serpina12</i> | <i>SERPINA12</i> |                     | Serine Protease inhibitor                                            | Regulation of gluconeogenesis    | Insulin resistance. Adipokine that modulates insulin action.                                                                      |
| <i>Sirt1</i>     | <i>SIRT1</i>     |                     | NAD-dependent protein deacetylase sirtuin-1                          | Biological rhythms and apoptosis | Involved in longevity and ageing associated cancer                                                                                |
| <i>Sirt3</i>     | <i>SIRT3</i>     |                     | NAD-dependent protein deacetylase sirtuin-3                          | Aerobic respiration              | Important for regulating tissue-specific ATP levels                                                                               |
| <i>Slc2a2</i>    | <i>SLC2A2</i>    | <i>GLUT2, Glut2</i> | Solute carrier family 2, facilitated glucose transporter member 2    | Carbohydrate transport           | Facilitative hexose transporter that mediates the transport of glucose and fructose                                               |
| <i>Socs2</i>     | <i>SOCS2</i>     | <i>SSI2</i>         | Suppressor of cytokine signaling 2                                   | Growth regulation                | Cytokine signaling, IGF signaling. Part of a classical negative feedback system that regulates cytokine signal transduction.      |
| <i>Sod2</i>      | <i>SOD2</i>      |                     | Superoxide dismutase                                                 | Oxygen homeostasis               | Mitochondrial antioxidant                                                                                                         |

|               |               |                 |                                              |                                          |                                                                                                                        |
|---------------|---------------|-----------------|----------------------------------------------|------------------------------------------|------------------------------------------------------------------------------------------------------------------------|
| <i>Srebf1</i> | <i>SREBF1</i> | <i>SREBP-1c</i> | Sterol regulatory element-binding protein 1  | Lipid metabolism                         | Key transcription factor that regulates expression of genes involved in cholesterol biosynthesis and lipid homeostasis |
| <i>Tgfb1</i>  | <i>TGFB1</i>  |                 | Transforming growth factor beta-1 proprotein | Cell growth and differentiation          | Multifunctional protein that regulates the growth and differentiation of various cell types.                           |
| <i>Timp1</i>  | <i>TIMP1</i>  |                 | Tissue Inhibitor of Metalloproteinases 1     | Negative regulation of catalytic process | Inhibitor of Metalloproteinases                                                                                        |
| <i>Tlr2</i>   | <i>TLR2</i>   |                 | Toll-Like-Receptor 2                         | Innate immunity                          | Mediates the innate immune response to bacterial lipoproteins and other microbial cell wall components.                |
| <i>Tlr4</i>   | <i>TLR4</i>   |                 | Toll-Like-Receptor 4                         | Innate immunity                          | Mediates the innate immune response to bacterial lipopolysaccharide                                                    |
| <i>Tnf</i>    | <i>TNF</i>    |                 | Tumor necrosis factor                        | Inflammatory response                    | It is mainly secreted by macrophages and can induce cell death and is a potent pyrogen                                 |
| <i>Ucp2</i>   | <i>UCP2</i>   |                 | Mitochondrial uncoupling protein 2           | Adaptive thermogenesis                   | Uncouples oxidative phosphorylation from ATP synthesis. As a result, energy is dissipated in the form of heat          |
