# Supplementary material for: Impact of Maternal Obesity on Liver Disease in the Offspring: A Comprehensive Transcriptomic Analysis and Confirmation of Results in a Murine Model
Source: Biomedicines. 2022 Jan 27;10(2):294. doi: 10.3390/biomedicines10020294 (PMC8869223; doi:10.3390/biomedicines10020294)
Supplement: Supplementary file 1 [file biomedicines-10-00294-s001.zip › Supplementary Table S3_Primers.pdf]

**Supplemental Table S3** Primers used in this study

| Gene            | NM accessions  | Primer forward sequence  | Primer reverse sequence  |
|-----------------|----------------|--------------------------|--------------------------|
| m-EGFR          | NM_207655.2    | GGACTGTGTCTCCTGCCAGAAT   | TCCACAAACTCCCTTGGTTC     |
| m-PPAR $\gamma$ | NM_001127330.2 | CTCACAATGCCATCAGGT       | GCTGGTCGATATCACTGG       |
| m-VEGFb         | NM_011697.3    | ACTGGGCAACACCAAGTCCGAA   | CACATTGGCTGTGTTCTTCCAGG  |
| m-WNT2          | NM_023653.5    | TCTGTCTATCTTGGGCATTCTG   | TTCTTCGCTATGTGATGTTTC    |
| m-NRP1          | NM_001358959.1 | TGAGCCCTGTGGTCTATTCC     | CGTCCTTCTTTCCAGTGGTC     |
| m-VIM           | NM_011701.4    | CGGAAAGTGGAATCCTTGCAGG   | AGCAGTGAGGTCAGGCTTGGAA   |
| m-TLE1          | NM_011599.5    | GTGCCACCCTTGTGAGTTTT     | GGTTTCTCAGGGGTAAGGATG    |
| m-CASP7         | XM_006526616.5 | CCGTCCACAATGACTGCTCTTG   | CCCGTAAATCAGGTCCTCTTCC   |
| m-WNT5b         | NM_001271758.1 | TGTCAGTTGTATCAGGAGCACA   | GTGAAGGCAGTCTCTCGGCTA    |
| m-DAAM1         | NM_026102.3    | GAACACAAGCATGAGCTGGA     | AACACCTCCTCAGAGCCAGA     |
| m-TLR2          | NM_011905.3    | ACAGCAAGGTCTTCCTGGTTC    | GCTCCCTTACAGGCTGAGTTCT   |
| m-FGF21         | NM_020013.4    | CTGGGGGTCTACCAAGCATA     | GCCTACCACTGTTCCATCCT     |
| m-FGFR1         | NM_010206.3    | ACCAAGAAGAGCGACTTCCA     | AACCAGGAGAACCCCAGAGT     |
| m-RXRA          | NM_011305.3    | GTGAAAGATGGGATTCTCCTGGC  | GTCACGCATCTTAGACACCAGC   |
| m-CASP6         | NM_009811      | CATGGTGGATCACCAGACAGAC   | GGAGCCATTACAGTTTCTCGG    |
| m-TLR4          | NM_021297.2    | GGCAGCAGGTGGAATTGTAT     | AGGATTGAGGCTTTTCCAT      |
| m-PPAR $\alpha$ | NM_011144.6    | ACGATGCTGTCCTCCTTGATG    | GTGTGATAAAGCCATTGCCGT    |
| m-PPAR $\delta$ | NM_011145.3    | TCCCAGGGTCAGAAGCTAGA     | CCAGTCTGGATGCTGCTACA     |
| m-TNF           | NM_013693.3    | CTGGGAGTAGACAAGGTACAACCC | CACCAAGTGGAGGAGCAGCT     |
| m-SLC2A2        | NM_031197.2    | AAGGATCTGCTCACATAGTCACT  | TTGCAGCCAACATTGCTTTGA    |
| m-MTTP          | NM_001163457.2 | CCAGGAAAGGTTCTCTATGCC    | GACTCTCTGATGTCGTTGCTTGC  |
| m-MERTK         | NM_008587.2    | ATCATCTCTGGCTGCTTCTGTG   | ACGACCAGTTGGGAATCCTCCT   |
| m-SREBF1        | NM_011480.4    | GCAATCCTTTGGCCTCGCTTTT   | CAGCAACCACTGGGTCCAATTAGA |
