# Supplementary material for: Impact of Maternal Obesity on Liver Disease in the Offspring: A Comprehensive Transcriptomic Analysis and Confirmation of Results in a Murine Model
Source: Biomedicines. 2022 Jan 27;10(2):294. doi: 10.3390/biomedicines10020294 (PMC8869223; doi:10.3390/biomedicines10020294)
Supplement: Supplementary file 1 [file biomedicines-10-00294-s001.zip › Supplementary Table S4_TopDifferentiallyExpressedGenes.csv]

	symbol	cons_up	cons_dn	max_cons	total	median_logFC	FDR_comb	Fisher_P.Val	pathway_reactome
1	Acy3	1	5	5	10	0.19133735	3.92E-08	7.16E-05	Biological oxidations,Metabolism,Aflatoxin activation and detoxification
2	Galnt2	5	0	5	10	0.1911648	4.62E-07	8.27E-08	Intra-Golgi and retrograde Golgi-to-ER traffic,Vesicle-mediated transport,COPI-independent Golgi-to-ER retrograde traffic,Membrane Trafficking,Golgi-to-ER retrograde transport,O-linked glycosylation of mucins,O-linked glycosylation,Post-translational protein modification,Metabolism of proteins
3	Agtr1a	5	1	5	10	0.18137675	2.07E-08	6.18E-12	GPCR ligand binding,Signaling by GPCR,Peptide ligand-binding receptors,Class A/1 (Rhodopsin-like receptors),Signal Transduction,GPCR downstream signalling,G alpha (q) signalling events,Vesicle-mediated transport,Clathrin-mediated endocytosis,Membrane Trafficking,Cargo recognition for clathrin-mediated endocytosis
4	Sae1	0	5	5	10	0.1690515	1.46E-07	4.92E-07	Post-translational protein modification,SAE1),Metabolism of proteins,SUMOylation,Processing and activation of SUMO,SUMO is transferred from E1 to E2 (UBE2I, UBC9)
5	Mttp	5	0	5	10	0.141851	1.30E-06	5.02E-05	Transport of small molecules,Plasma lipoprotein assembly,VLDL assembly,Plasma lipoprotein assembly, remodeling, and clearance,Chylomicron assembly
6	Lcn2	0	4	4	10	1.2322655	1.53E-05	0.000157623	Innate Immune System,Neutrophil degranulation,Immune System,Metal sequestration by antimicrobial proteins,Antimicrobial peptides,Transport of small molecules,Iron uptake and transport
7	Mt1	0	4	4	10	0.73666975	3.10E-05	3.71E-05	Cellular responses to stimuli,Response to metal ions,Metallothioneins bind metals
8	Acot1	4	0	4	8	0.702016948	8.96E-06	2.89E-07	Metabolism of lipids,Fatty acid metabolism,Mitochondrial Fatty Acid Beta-Oxidation,Metabolism,Peroxisomal protein import,Protein localization
9	Egfr	4	2	4	10	0.41829365	1.83E-08	2.06E-08	Signaling by ERBB2,Signaling by Receptor Tyrosine Kinases,Signal Transduction,Signaling by ERBB4,SHC1 events in ERBB2 signaling,PIP3 activates AKT signaling,Intracellular signaling by second messengers,Signaling by EGFR,GRB2 events in EGFR signaling,GAB1 signalosome,SHC1 events in EGFR signaling,EGFR downregulation,PI3K events in ERBB2 signaling,EGFR interacts with phospholipase C-gamma,EGFR Tran…
10	Cyp51	1	4	4	10	0.388610082	1.12E-06	2.13E-05	Cholesterol biosynthesis,Metabolism of steroids,Metabolism of lipids,Metabolism,Endogenous sterols,Biological oxidations,Cytochrome P450 - arranged by substrate type,Phase I - Functionalization of compounds
11	Aldh1b1	0	4	4	10	0.3058252	8.88E-06	0.000558392	Ethanol oxidation,Metabolism,Biological oxidations,Phase I - Functionalization of compounds
12	Cxcl1	0	4	4	10	0.27958975	1.03E-05	2.26E-05	Chemokine receptors bind chemokines,Signal Transduction,Class A/1 (Rhodopsin-like receptors),GPCR ligand binding,Signaling by GPCR,Peptide ligand-binding receptors,GPCR downstream signalling,G alpha (i) signalling events,Innate Immune System,Neutrophil degranulation,Immune System
13	Gpc1	0	4	4	10	0.2566919	7.83E-06	4.95E-08	Chondroitin sulfate/dermatan sulfate metabolism,Heparan sulfate/heparin (HS-GAG) metabolism,Metabolism,Glycosaminoglycan metabolism,A tetrasaccharide linker sequence is required for GAG synthesis,Metabolism of carbohydrates,HS-GAG biosynthesis,HS-GAG degradation,Hemostasis,Cell surface interactions at the vascular wall,Axon guidance,Signaling by ROBO receptors,Developmental Biology,Nervous system…
14	Slco2a1	4	0	4	10	0.25557335	2.76E-05	7.74E-09	Transport of organic anions,SLC-mediated transmembrane transport,Transport of small molecules,Transport of vitamins, nucleosides, and related molecules
15	Cd9	4	0	4	10	0.2392885	1.59E-05	8.49E-13	Platelet degranulation ,Hemostasis,Platelet activation, signaling and aggregation,Response to elevated platelet cytosolic Ca2+,Reproduction,Fertilization,Oocyte Membrane Binding
16	Cd163	4	0	4	10	0.23374775	6.19E-06	9.77E-05	Vesicle-mediated transport,Binding and Uptake of Ligands by Scavenger Receptors,Scavenging of heme from plasma
17	Dcxr	0	4	4	10	0.233025	8.81E-06	7.02E-08	Formation of xylulose-5-phosphate,Metabolism of carbohydrates,Metabolism
18	Apoa5	4	0	4	8	0.22795285	1.10E-05	9.33E-10	Metabolism of proteins,Regulation of Insulin-like Growth Factor (IGF) transport and uptake by Insulin-like Growth Factor Binding Proteins (IGFBPs),Post-translational protein modification,Post-translational protein phosphorylation,Plasma lipoprotein assembly, remodeling, and clearance,Chylomicron remodeling,Plasma lipoprotein remodeling,Transport of small molecules
19	Als2	4	1	4	8	0.2256827	4.71E-07	7.48E-09	RAB GEFs exchange GTP for GDP on RABs,Vesicle-mediated transport,Rab regulation of trafficking,Membrane Trafficking,Signaling by Rho GTPases, Miro GTPases and RHOBTB3,Signal Transduction,RHO GTPase cycle,Signaling by Rho GTPases,RAC1 GTPase cycle
20	Ube2e2	4	2	4	10	0.221758275	3.30E-08	1.24E-07	Adaptive Immune System,Immune System, Ubiquitination & Proteasome degradation,Class I MHC mediated antigen processing & presentation
21	Tgoln1	4	0	4	10	0.21867465	7.83E-06	1.54E-07	Metabolism of proteins,Regulation of Insulin-like Growth Factor (IGF) transport and uptake by Insulin-like Growth Factor Binding Proteins (IGFBPs),Membrane Trafficking,Vesicle-mediated transport,Golgi Associated Vesicle Biogenesis,trans-Golgi Network Vesicle Budding,Intra-Golgi and retrograde Golgi-to-ER traffic,Retrograde transport at the Trans-Golgi-Network,Clathrin-mediated endocytosis,Cargo r…
22	Slc22a18	0	4	4	8	0.21461955	8.61E-06	6.74E-06	Organic cation transport,Transport of small molecules,SLC-mediated transmembrane transport,Organic cation/anion/zwitterion transport,Transport of bile salts and organic acids, metal ions and amine compounds
23	Prnp	0	4	4	10	0.19357657	7.83E-06	5.97E-11	Insertion of tail-anchored proteins into the endoplasmic reticulum membrane,Protein localization
24	Col4a2	0	4	4	10	0.18850625	1.61E-05	0.000224776	Collagen degradation,Degradation of the extracellular matrix,Extracellular matrix organization,Collagen biosynthesis and modifying enzymes,Collagen formation,Signaling by Receptor Tyrosine Kinases,Signaling by PDGF,Signal Transduction,Assembly of collagen fibrils and other multimeric structures,Integrin cell surface interactions,Anchoring fibril formation,Crosslinking of collagen fibrils,Laminin …
25	Aqp1	4	1	4	10	0.1843567	6.65E-07	1.43E-06	Transport of small molecules,O2/CO2 exchange in erythrocytes,Erythrocytes take up carbon dioxide and release oxygen,Erythrocytes take up oxygen and release carbon dioxide,Vasopressin regulates renal water homeostasis via Aquaporins,Aquaporin-mediated transport,Passive transport by Aquaporins
26	Crat	4	0	4	10	0.184351635	7.83E-06	7.38E-05	Fatty acid metabolism,Beta-oxidation of pristanoyl-CoA,Metabolism of lipids,Metabolism,Peroxisomal lipid metabolism,Peroxisomal protein import,Protein localization
27	Ivd	0	4	4	10	0.17942515	1.59E-05	1.33E-07	Metabolism of amino acids and derivatives,Metabolism,Branched-chain amino acid catabolism
28	Fabp5	4	0	4	10	0.170626613	1.06E-05	0.002833701	Metabolism of lipids,Triglyceride catabolism,Triglyceride metabolism,Metabolism,Signaling by Nuclear Receptors,Signal Transduction,Signaling by Retinoic Acid,Innate Immune System,Neutrophil degranulation,Immune System
29	Top1	4	0	4	10	0.152531867	3.10E-05	0.00035326	SUMOylation,Post-translational protein modification,Metabolism of proteins,SUMO E3 ligases SUMOylate target proteins,SUMOylation of DNA replication proteins
30	Fdxr	0	4	4	10	0.14777265	1.59E-05	7.62E-05	Metabolism of steroid hormones,Pregnenolone biosynthesis,Metabolism of steroids,Metabolism,Metabolism of lipids,Endogenous sterols,Biological oxidations,Cytochrome P450 - arranged by substrate type,Phase I - Functionalization of compounds,Mitochondrial iron-sulfur cluster biogenesis,Electron transport from NADPH to Ferredoxin
31	Dap3	0	4	4	10	0.14567565	7.83E-06	2.30E-07	Metabolism of proteins,Translation,Mitochondrial translation elongation,Mitochondrial translation,Mitochondrial translation termination
32	Aldob	4	1	4	10	0.1439077	4.17E-07	2.40E-11	Metabolism of carbohydrates,Metabolism,Glucose metabolism,Glycolysis,Gluconeogenesis,Fructose metabolism,Fructose catabolism
33	Mmp14	4	0	4	10	0.14385925	1.59E-05	4.33E-06	Collagen degradation,Degradation of the extracellular matrix,Extracellular matrix organization,Activation of Matrix Metalloproteinases
34	Ada	4	1	4	10	0.142933006	1.21E-06	3.29E-06	Purine salvage,Nucleotide salvage,Metabolism of nucleotides,Metabolism
35	Pon2	4	0	4	10	0.14016215	1.59E-05	1.79E-07	Fatty acid metabolism,Metabolism of lipids,Synthesis of 5-eicosatetraenoic acids,Metabolism,Arachidonic acid metabolism
36	Atox1	0	4	4	10	0.1335985	1.53E-05	2.47E-06	Ion influx/efflux at host-pathogen interface,Antimicrobial peptides,Immune System,Innate Immune System
37	Tcf3	4	0	4	10	0.12718346	1.03E-05	1.42E-06	Myogenesis,Developmental Biology,Transcriptional regulation by RUNX1,RNA Polymerase II Transcription,RUNX1 regulates transcription of genes involved in differentiation of HSCs,Generic Transcription Pathway,Gene expression (Transcription)
38	Slc30a10	4	0	4	10	0.1264645	7.83E-06	4.56E-06	SLC-mediated transmembrane transport,Metal ion SLC transporters,Transport of small molecules,Transport of bile salts and organic acids, metal ions and amine compounds
39	Entpd2	0	4	4	8	0.12559692	1.70E-05	1.86E-06	Nucleobase catabolism,Metabolism,Phosphate bond hydrolysis by NTPDase proteins,Metabolism of nucleotides
40	Pold4	0	4	4	10	0.12135745	4.56E-06	0.00031076	DNA Damage Bypass,Recognition of DNA damage by PCNA-containing replication complex,DNA Repair,Polymerase switching on the C-strand of the telomere,Telomere Maintenance,Chromosome Maintenance,Telomere C-strand (Lagging Strand) Synthesis,Extension of Telomeres,Cell Cycle,Processive synthesis on the C-strand of the telomere,Removal of the Flap Intermediate from the C-strand,Mismatch Repair,MSH6 (Mut…
41	Amotl2	0	4	4	10	0.11771259	1.92E-05	0.002918575	Signal Transduction,Signaling by Hippo
42	Reck	4	0	4	10	0.108877805	3.52E-05	2.05E-07	synthesis of GPI-anchored proteins,Metabolism of proteins,Post-translational protein modification
43	Zfand6	4	0	4	8	0.108698561	8.61E-06	0.001487934	Peroxisomal protein import,Protein localization
44	Enpp1	4	0	4	8	0.1057729	3.97E-05	0.00014977	Metabolism,Metabolism of water-soluble vitamins and cofactors,Vitamin B2 (riboflavin) metabolism,Metabolism of vitamins and cofactors
45	Scamp1	4	0	4	10	0.102378051	7.83E-06	5.51E-05	Innate Immune System,Neutrophil degranulation,Immune System
46	Lsm3	0	4	4	10	0.10199435	1.53E-05	0.005711157	mRNA decay by 5' to 3' exoribonuclease,Deadenylation-dependent mRNA decay,Metabolism of RNA,mRNA Splicing,mRNA Splicing - Major Pathway,Processing of Capped Intron-Containing Pre-mRNA
47	Orm2	0	3	3	10	0.83863485	0.000365462	0.000547108	Platelet degranulation ,Hemostasis,Platelet activation, signaling and aggregation,Response to elevated platelet cytosolic Ca2+,Innate Immune System,Neutrophil degranulation,Immune System
48	Cyp4a14	3	0	3	10	0.584126934	4.53E-05	0.000440841	Biological oxidations,Fatty acids,Phase I - Functionalization of compounds,Metabolism,Cytochrome P450 - arranged by substrate type,Miscellaneous substrates,Eicosanoids,Metabolism of lipids,Synthesis of Leukotrienes (LT) and Eoxins (EX),Fatty acid metabolism,Arachidonic acid metabolism
49	Krt23	0	3	3	8	0.50514045	6.42E-05	0.00084507	Keratinization,Developmental Biology,Formation of the cornified envelope
50	Cfd	1	3	3	10	0.4800173	4.26E-06	0.003661053	Platelet degranulation ,Hemostasis,Platelet activation, signaling and aggregation,Response to elevated platelet cytosolic Ca2+,Alternative complement activation,Innate Immune System,Initial triggering of complement,Complement cascade,Immune System,Neutrophil degranulation
51	Tubb2b	3	0	3	8	0.428019938	0.000430429	8.71E-07	Microtubule-dependent trafficking of connexons from Golgi to the plasma membrane,Gap junction trafficking and regulation,Vesicle-mediated transport,Gap junction assembly,Membrane Trafficking,Gap junction trafficking,Transport of connexons to the plasma membrane,Adaptive Immune System,Immune System,MHC class II antigen presentation,M Phase,Mitotic Metaphase and Anaphase,Separation of Sister Chroma…
52	Nnmt	0	3	3	10	0.398377809	0.000365462	0.000101105	Biological oxidations,Metabolism,Phase II - Conjugation of compounds,Methylation,Metabolism of water-soluble vitamins and cofactors,Metabolism of vitamins and cofactors,Nicotinate metabolism,Nicotinamide salvaging
53	Slc17a8	3	0	3	10	0.3982077	0.000110475	2.85E-06	Transport of small molecules,Transport of inorganic cations/anions and amino acids/oligopeptides,SLC-mediated transmembrane transport,Organic anion transporters
54	Cyp4a31	3	1	3	8	0.3840199	2.68E-06	3.91E-05	Biological oxidations,Fatty acids,Phase I - Functionalization of compounds,Metabolism,Cytochrome P450 - arranged by substrate type,Miscellaneous substrates,Eicosanoids,Metabolism of lipids,Synthesis of Leukotrienes (LT) and Eoxins (EX),Fatty acid metabolism,Arachidonic acid metabolism
55	Slc13a3	1	3	3	10	0.360936593	3.10E-05	1.38E-08	Transport of small molecules,Transport of bile salts and organic acids, metal ions and amine compounds,Sodium-coupled sulphate, di- and tri-carboxylate transporters,SLC-mediated transmembrane transport
56	St3gal5	3	0	3	8	0.3037586	0.000141956	0.000836483	Metabolism of proteins,Asparagine N-linked glycosylation,Biosynthesis of the N-glycan precursor (dolichol lipid-linked oligosaccharide, LLO) and transfer to a nascent protein,Sialic acid metabolism,Synthesis of substrates in N-glycan biosythesis,Post-translational protein modification
57	Upp2	0	3	3	10	0.302033203	0.000187447	0.017391713	Nucleotide salvage,Pyrimidine salvage,Metabolism,Metabolism of nucleotides,Nucleobase catabolism,Pyrimidine catabolism
58	Gstm1	2	3	3	10	0.2846568	9.52E-07	5.56E-12	Phase II - Conjugation of compounds,Biological oxidations,Glutathione conjugation,Metabolism
59	Gpd2	3	0	3	8	0.28157085	0.000725504	5.87E-06	Metabolism of lipids,Metabolism,Phospholipid metabolism,Glycerophospholipid biosynthesis,Synthesis of PA,Triglyceride catabolism,Triglyceride metabolism
60	Lss	1	3	3	10	0.2770918	2.11E-05	8.18E-08	Cholesterol biosynthesis,Metabolism of steroids,Metabolism of lipids,Metabolism
61	Pparg	0	3	3	10	0.267616691	2.51E-05	0.001804999	Transcriptional regulation of white adipocyte differentiation,Developmental Biology,RNA Polymerase II Transcription,Nuclear Receptor transcription pathway,Generic Transcription Pathway,Gene expression (Transcription)
62	Vegfb	3	0	3	10	0.2631433	0.000187447	3.01E-09	Platelet degranulation ,Hemostasis,Platelet activation, signaling and aggregation,Response to elevated platelet cytosolic Ca2+,Signaling by VEGF,Signaling by Receptor Tyrosine Kinases,VEGF ligand-receptor interactions,Signal Transduction,VEGF binds to VEGFR leading to receptor dimerization
63	Elovl6	3	0	3	10	0.2622286	0.000365462	6.00E-11	Fatty acyl-CoA biosynthesis,Fatty acid metabolism,Metabolism,Synthesis of very long-chain fatty acyl-CoAs,Metabolism of lipids
64	Slc2a2	3	2	3	10	0.24948125	1.63E-06	7.73E-08	Cellular hexose transport,SLC-mediated transmembrane transport,Transport of small molecules,Metabolism,Regulation of insulin secretion,Integration of energy metabolism,Intestinal hexose absorption,Intestinal absorption,Digestion and absorption
65	Il1rn	1	3	3	10	0.248856835	2.11E-05	0.000342268	Cytokine Signaling in Immune system,Immune System,Interleukin-1 family signaling,Interleukin-1 signaling,Signaling by Interleukins
66	Wnt2	3	0	3	10	0.248731776	0.000660185	0.002696828	Signal Transduction,WNT ligand biogenesis and trafficking,Signaling by WNT
67	Gldc	1	3	3	10	0.2486015	5.12E-06	2.31E-05	Metabolism,Glycine degradation,Glyoxylate metabolism and glycine degradation,Metabolism of amino acids and derivatives
68	Chka	1	3	3	10	0.24212015	1.53E-05	0.001810007	Phospholipid metabolism,Metabolism of lipids,Metabolism,Synthesis of PC,Glycerophospholipid biosynthesis,Synthesis of PE
69	Dct	1	3	3	10	0.2395208	1.73E-05	6.14E-10	Metabolism of amino acids and derivatives,Metabolism,Melanin biosynthesis
70	Aspg	0	3	3	6	0.231792	0.000177248	0.001365261	Metabolism of amino acids and derivatives,Aspartate and asparagine metabolism,Metabolism
71	Tpm2	0	3	3	10	0.2253718	7.79E-05	0.002556558	Muscle contraction,Striated Muscle Contraction,Smooth Muscle Contraction
72	Rab3d	3	1	3	8	0.22519395	1.95E-05	1.83E-12	Innate Immune System,Neutrophil degranulation,Immune System,Post-translational protein modification,RAB geranylgeranylation,Metabolism of proteins
73	Blvrb	3	2	3	10	0.22047375	9.52E-07	2.45E-08	Metabolism of porphyrins,Metabolism,Heme degradation,Cellular response to chemical stress,Cytoprotection by HMOX1,Cellular responses to stimuli,Cellular responses to stress
74	Pcsk9	0	3	3	10	0.21923275	2.84E-05	0.003304163	Metabolism of proteins,Regulation of Insulin-like Growth Factor (IGF) transport and uptake by Insulin-like Growth Factor Binding Proteins (IGFBPs),Plasma lipoprotein assembly, remodeling, and clearance,VLDLR internalisation and degradation,Plasma lipoprotein clearance,Transport of small molecules,Post-translational protein modification,Post-translational protein phosphorylation,LDL clearance
75	Nrp1	3	0	3	8	0.21876785	7.75E-05	8.70E-05	Neurophilin interactions with VEGF and VEGFR,Signaling by VEGF,Signal Transduction,Signaling by Receptor Tyrosine Kinases,Sema3A PAK dependent Axon repulsion,Developmental Biology,Axon guidance,Nervous system development,Semaphorin interactions,SEMA3A-Plexin repulsion signaling by inhibiting Integrin adhesion,CRMPs in Sema3A signaling,L1CAM interactions,Signal transduction by L1
76	Adam11	1	3	3	10	0.215889276	2.00E-05	9.94E-06	LGI-ADAM interactions,Developmental Biology
77	Adora1	1	3	3	10	0.2132933	1.37E-06	0.000667591	Class A/1 (Rhodopsin-like receptors),GPCR ligand binding,Signaling by GPCR,Nucleotide-like (purinergic) receptors,Adenosine P1 receptors,Signal Transduction,GPCR downstream signalling,G alpha (i) signalling events
78	Ppm1k	1	3	3	10	0.21255265	1.53E-05	5.20E-11	Metabolism of amino acids and derivatives,Metabolism,Branched-chain amino acid catabolism
79	Oat	1	3	3	10	0.2095907	3.10E-05	0.002572603	Metabolism of amino acids and derivatives,Glutamate and glutamine metabolism,Metabolism
80	Rapgef4	3	0	3	10	0.2067597	6.03E-05	1.92E-05	Hemostasis,Platelet Aggregation (Plug Formation),Platelet activation, signaling and aggregation,Signal Transduction,Integrin signaling,Regulation of insulin secretion,Glucagon-like Peptide-1 (GLP1) regulates insulin secretion,Integration of energy metabolism,Metabolism,Immune System,Adaptive Immune System,Rap1 signalling
81	Prodh	0	3	3	10	0.1988755	0.000187447	0.000256414	Metabolism,Metabolism of amino acids and derivatives,Proline catabolism
82	Vps28	0	3	3	4	0.197957618	7.53E-05	0.00021112	Vesicle-mediated transport,Membrane Trafficking,Endosomal Sorting Complex Required For Transport (ESCRT)
83	Khk	3	1	3	10	0.19780805	2.76E-05	6.26E-06	Fructose metabolism,Fructose catabolism,Metabolism,Metabolism of carbohydrates
84	Amdhd1	0	3	3	8	0.19085355	6.78E-05	0.000964895	Metabolism,Metabolism of amino acids and derivatives,Histidine catabolism
85	Ehd3	3	0	3	10	0.19084725	0.000660185	0.002276405	Hemostasis,Factors involved in megakaryocyte development and platelet production
86	Hexa	0	3	3	10	0.18995135	0.000325009	2.37E-05	Glycosphingolipid metabolism,Sphingolipid metabolism,Metabolism,Metabolism of lipids,Metabolism of carbohydrates,Keratan sulfate/keratin metabolism,Keratan sulfate degradation,Glycosaminoglycan metabolism,Chondroitin sulfate/dermatan sulfate metabolism,CS/DS degradation,Hyaluronan uptake and degradation,Hyaluronan metabolism
87	Gabarapl1	1	3	3	10	0.1886249	3.61E-05	7.98E-05	Macroautophagy,Autophagy
88	Col1a1	0	3	3	10	0.18649979	0.000110475	0.002546148	GPVI-mediated activation cascade,Hemostasis,Platelet activation, signaling and aggregation,Collagen degradation,Degradation of the extracellular matrix,Extracellular matrix organization,Collagen biosynthesis and modifying enzymes,Collagen formation,Immune System,Adaptive Immune System,Immunoregulatory interactions between a Lymphoid and a non-Lymphoid cell,Assembly of collagen fibrils and other m…
89	Slc7a5	3	0	3	8	0.185918743	0.000226744	0.005107318	Basigin interactions,Hemostasis,Cell surface interactions at the vascular wall,Transport of small molecules,Amino acid transport across the plasma membrane,SLC-mediated transmembrane transport,Transport of inorganic cations/anions and amino acids/oligopeptides,Tryptophan catabolism,Metabolism,Metabolism of amino acids and derivatives
90	Pdk4	3	0	3	10	0.1847618	0.000158243	0.040329535	The citric acid (TCA) cycle and respiratory electron transport,Metabolism,Regulation of pyruvate dehydrogenase (PDH) complex,Pyruvate metabolism,Pyruvate metabolism and Citric Acid (TCA) cycle,Signaling by Nuclear Receptors,Signal Transduction,Signaling by Retinoic Acid
91	Zap70	0	3	3	10	0.183263298	0.000110032	0.000347973	Adaptive Immune System,TCR signaling,Immune System,Translocation of ZAP-70 to Immunological synapse,Generation of second messenger molecules,Signal Transduction,RHO GTPase cycle,RHOH GTPase cycle,Signaling by Rho GTPases,Signaling by Rho GTPases, Miro GTPases and RHOBTB3
92	Stard4	3	2	3	10	0.1819902	2.38E-07	0.000638027	Metabolism of steroid hormones,Pregnenolone biosynthesis,Metabolism of steroids,Metabolism,Metabolism of lipids
93	Abcd2	3	1	3	10	0.181081704	3.90E-05	7.62E-10	ABC transporters in lipid homeostasis,Transport of small molecules,ABC-family proteins mediated transport,Class I peroxisomal membrane protein import,Protein localization
94	Mgll	3	0	3	10	0.1810504	0.000365462	2.11E-05	Acyl chain remodeling of DAG and TAG,Glycerophospholipid biosynthesis,Metabolism,Metabolism of lipids,Phospholipid metabolism,Signaling by GPCR,Signal Transduction,Platelet activation, signaling and aggregation,Effects of PIP2 hydrolysis,G alpha (q) signalling events,Hemostasis,Arachidonate production from DAG,GPCR downstream signalling
95	Heatr1	1	3	3	10	0.18089815	9.98E-06	2.03E-07	Major pathway of rRNA processing in the nucleolus and cytosol,Metabolism of RNA,rRNA processing in the nucleus and cytosol,rRNA processing
96	Rpl12	3	0	3	6	0.178089694	0.000408676	0.000577914	Eukaryotic Translation Initiation,Translation,Metabolism of proteins,L13a-mediated translational silencing of Ceruloplasmin expression,SRP-dependent cotranslational protein targeting to membrane,Major pathway of rRNA processing in the nucleolus and cytosol,Metabolism of RNA,rRNA processing in the nucleus and cytosol,rRNA processing,Formation of a pool of free 40S subunits,Cap-dependent Translatio…
97	Gnl3	3	1	3	10	0.17660205	1.78E-05	4.52E-05	Major pathway of rRNA processing in the nucleolus and cytosol,Metabolism of RNA,rRNA processing in the nucleus and cytosol,rRNA processing
98	Uroc1	0	3	3	8	0.17539345	0.000132264	0.011854171	Metabolism,Metabolism of amino acids and derivatives,Histidine catabolism
99	Cept1	3	0	3	8	0.17404785	0.000205993	0.000107174	Phospholipid metabolism,Metabolism of lipids,Metabolism,Synthesis of PC,Glycerophospholipid biosynthesis,Synthesis of PE
100	Slc7a2	0	3	3	10	0.170741468	0.000325769	0.021927092	Transport of small molecules,Amino acid transport across the plasma membrane,SLC-mediated transmembrane transport,Transport of inorganic cations/anions and amino acids/oligopeptides
101	Bdh2	0	3	3	8	0.17009265	3.16E-05	0.002901922	Metabolism of lipids,Synthesis of Ketone Bodies,Ketone body metabolism,Metabolism
102	Mrpl23	1	3	3	6	0.169939	2.18E-05	0.000151306	Metabolism of proteins,Translation,Mitochondrial translation elongation,Mitochondrial translation,Mitochondrial translation termination
103	Tmem86b	0	3	3	10	0.16747585	0.000187447	0.000113818	Metabolism of lipids,Metabolism,Glycerophospholipid biosynthesis,Phospholipid metabolism,Acyl chain remodelling of PC
104	Plxna2	1	3	3	10	0.165386803	3.28E-05	0.002450226	Sema3A PAK dependent Axon repulsion,Developmental Biology,Axon guidance,Nervous system development,Semaphorin interactions,SEMA3A-Plexin repulsion signaling by inhibiting Integrin adhesion,CRMPs in Sema3A signaling
105	Rrm2	3	1	3	10	0.16472305	2.44E-05	2.51E-08	Metabolism of nucleotides,Interconversion of nucleotide di- and triphosphates,Metabolism
106	Cyp2f2	0	3	3	10	0.15744845	0.000660185	0.001440038	Biological oxidations,Fatty acids,Phase I - Functionalization of compounds,Metabolism,Cytochrome P450 - arranged by substrate type,Xenobiotics,CYP2E1 reactions
107	Acsl1	3	0	3	10	0.157278059	2.51E-05	0.004365333	Metabolism of lipids,alpha-linolenic (omega3) and linoleic (omega6) acid metabolism,Linoleic acid (LA) metabolism,Metabolism,Fatty acid metabolism,alpha-linolenic acid (ALA) metabolism,Fatty acyl-CoA biosynthesis,Synthesis of very long-chain fatty acyl-CoAs
108	Rpl24	3	0	3	6	0.153932277	0.00039839	5.17E-06	Eukaryotic Translation Initiation,Translation,Metabolism of proteins,L13a-mediated translational silencing of Ceruloplasmin expression,SRP-dependent cotranslational protein targeting to membrane,Major pathway of rRNA processing in the nucleolus and cytosol,Metabolism of RNA,rRNA processing in the nucleus and cytosol,rRNA processing,Formation of a pool of free 40S subunits,Cap-dependent Translatio…
109	Elovl3	3	0	3	10	0.15355525	7.79E-05	4.34E-06	Metabolism of lipids,alpha-linolenic (omega3) and linoleic (omega6) acid metabolism,Linoleic acid (LA) metabolism,Metabolism,Fatty acid metabolism,alpha-linolenic acid (ALA) metabolism,Fatty acyl-CoA biosynthesis,Synthesis of very long-chain fatty acyl-CoAs
110	Gm2a	3	1	3	10	0.15314795	1.11E-05	9.82E-08	Glycosphingolipid metabolism,Sphingolipid metabolism,Metabolism,Metabolism of lipids,Innate Immune System,Neutrophil degranulation,Immune System
111	Arhgef15	3	0	3	8	0.153116289	0.000725504	0.001211805	Death Receptor Signalling,NRAGE signals death through JNK,Signal Transduction,Cell death signalling via NRAGE, NRIF and NADE,p75 NTR receptor-mediated signalling,Signaling by GPCR,G alpha (12/13) signalling events,GPCR downstream signalling,RHOA GTPase cycle,Signaling by Rho GTPases, Miro GTPases and RHOBTB3,Signaling by Rho GTPases,RHO GTPase cycle,CDC42 GTPase cycle,RAC1 GTPase cycle
112	Snrpd3	3	0	3	10	0.15017535	0.000325009	4.57E-05	SLBP independent Processing of Histone Pre-mRNAs,Metabolism of RNA,Processing of Capped Intronless Pre-mRNA,snRNP Assembly,Metabolism of non-coding RNA,mRNA Splicing,mRNA Splicing - Major Pathway,Processing of Capped Intron-Containing Pre-mRNA,mRNA Splicing - Minor Pathway,RNA Polymerase II Transcription Termination,Gene expression (Transcription),RNA Polymerase II Transcription,SLBP Dependent Pr…
113	Ranbp10	3	0	3	10	0.14720895	0.000187447	0.001611607	Signal Transduction,MET activates RAS signaling,Signaling by Receptor Tyrosine Kinases,Signaling by MET
114	Pigr	1	3	3	10	0.14700234	2.76E-05	0.006957076	Innate Immune System,Neutrophil degranulation,Immune System
115	Glo1	3	0	3	8	0.14637745	0.000357165	0.0013234	Metabolism,Pyruvate metabolism and Citric Acid (TCA) cycle,Pyruvate metabolism,The citric acid (TCA) cycle and respiratory electron transport
116	C2	2	3	3	10	0.1463554	1.51E-06	1.62E-06	Immune System,Complement cascade,Innate Immune System,Initial triggering of complement,Activation of C3 and C5,Regulation of Complement cascade
117	Vim	0	3	3	10	0.145791925	5.85E-05	0.007147346	Apoptotic cleavage of cellular proteins,Caspase-mediated cleavage of cytoskeletal proteins,Apoptosis,Programmed Cell Death,Apoptotic execution phase,Muscle contraction,Striated Muscle Contraction,Signaling by Rho GTPases,RHOBTB1 GTPase cycle,RHOBTB GTPase Cycle,Signaling by Rho GTPases, Miro GTPases and RHOBTB3,Signal Transduction,RHO GTPase cycle,Selective autophagy,Autophagy,Aggrephagy,Macroaut…
118	Sap30	3	0	3	10	0.14495142	0.000660185	0.004434129	Chromatin modifying enzymes,Chromatin organization,HDACs deacetylate histones
119	Slc6a13	3	0	3	10	0.14195995	0.000187447	1.83E-05	Na+/Cl- dependent neurotransmitter transporters,Transport of bile salts and organic acids, metal ions and amine compounds,Transport of small molecules,SLC-mediated transmembrane transport,Neuronal System,Neurotransmitter release cycle,GABA synthesis, release, reuptake and degradation,Transmission across Chemical Synapses,Reuptake of GABA
120	Pigx	3	0	3	8	0.1417185	3.34E-05	0.001799529	synthesis of GPI-anchored proteins,Metabolism of proteins,Post-translational protein modification,Synthesis of glycosylphosphatidylinositol (GPI)
121	Glrx	3	0	3	10	0.14141225	6.37E-05	4.22E-05	Metabolism of nucleotides,Interconversion of nucleotide di- and triphosphates,Metabolism
122	Stard5	2	3	3	10	0.14109825	2.43E-07	3.35E-05	Metabolism,Metabolism of steroids,Bile acid and bile salt metabolism,Recycling of bile acids and salts,Metabolism of lipids
123	Hexb	0	3	3	10	0.1408104	0.000365462	4.69E-08	Glycosphingolipid metabolism,Sphingolipid metabolism,Metabolism,Metabolism of lipids,Metabolism of carbohydrates,Keratan sulfate/keratin metabolism,Keratan sulfate degradation,Glycosaminoglycan metabolism,Chondroitin sulfate/dermatan sulfate metabolism,CS/DS degradation,Hyaluronan uptake and degradation,Hyaluronan metabolism,Innate Immune System,Neutrophil degranulation,Immune System
124	Ngef	1	3	3	10	0.13954165	1.03E-05	3.13E-05	Death Receptor Signalling,NRAGE signals death through JNK,Signal Transduction,Cell death signalling via NRAGE, NRIF and NADE,p75 NTR receptor-mediated signalling,Axon guidance,Nervous system development,EPH-Ephrin signaling,Developmental Biology,EPHA-mediated growth cone collapse,Signaling by GPCR,G alpha (12/13) signalling events,GPCR downstream signalling,RHOA GTPase cycle,Signaling by Rho GTPa…
125	Pmm1	0	3	3	10	0.13931645	3.15E-05	0.001325551	Asparagine N-linked glycosylation,Biosynthesis of the N-glycan precursor (dolichol lipid-linked oligosaccharide, LLO) and transfer to a nascent protein,Metabolism of proteins,Synthesis of GDP-mannose,Post-translational protein modification,Synthesis of substrates in N-glycan biosythesis
126	Ulk1	3	0	3	10	0.1370382	0.000198776	0.004585253	Macroautophagy,Autophagy,Membrane Trafficking,Vesicle-mediated transport,TBC/RABGAPs,Rab regulation of trafficking,RAB GEFs exchange GTP for GDP on RABs,Mitophagy,Receptor Mediated Mitophagy,Selective autophagy
127	Adipor2	3	1	3	10	0.13552165	1.37E-06	0.000378519	Metabolism,Integration of energy metabolism,AMPK inhibits chREBP transcriptional activation activity
128	Gtf2f2	3	0	3	10	0.1353269	0.000414168	4.83E-08	Formation of RNA Pol II elongation complex ,RNA Polymerase II Transcription Elongation,Gene expression (Transcription),RNA Polymerase II Transcription,Formation of the Early Elongation Complex,RNA Polymerase II Pre-transcription Events,Transcriptional Regulation by TP53,TP53 Regulates Transcription of DNA Repair Genes,Generic Transcription Pathway,FGFR2 alternative splicing,Signaling by FGFR,Sign…
129	Rpl37	3	1	3	10	0.13410725	1.59E-05	4.34E-06	Eukaryotic Translation Initiation,Translation,Metabolism of proteins,L13a-mediated translational silencing of Ceruloplasmin expression,SRP-dependent cotranslational protein targeting to membrane,Major pathway of rRNA processing in the nucleolus and cytosol,Metabolism of RNA,rRNA processing in the nucleus and cytosol,rRNA processing,Formation of a pool of free 40S subunits,Cap-dependent Translatio…
130	Col14a1	0	3	3	10	0.132372444	0.000110475	0.018886089	Collagen biosynthesis and modifying enzymes,Collagen formation,Extracellular matrix organization,Assembly of collagen fibrils and other multimeric structures,Collagen chain trimerization
131	Bloc1s1	0	3	3	10	0.130094243	0.000187447	0.002289296	Lysosome Vesicle Biogenesis,Vesicle-mediated transport,trans-Golgi Network Vesicle Budding,Membrane Trafficking,Golgi Associated Vesicle Biogenesis
132	Hao1	3	0	3	10	0.1293381	4.53E-05	0.009823904	Glyoxylate metabolism and glycine degradation,Metabolism,Metabolism of amino acids and derivatives,Peroxisomal protein import,Protein localization
133	Tle1	3	0	3	10	0.1277617	0.000190781	0.011823287	Signal Transduction,Signaling by WNT,TCF transactivating complex,TCF dependent signaling in response to WNT,Deactivation of the beta-catenin transactivating complex,Repression of WNT target genes,Degradation of beta-catenin by the destruction complex
134	Hmg20b	3	0	3	10	0.12701775	0.000425343	5.50E-07	Chromatin modifying enzymes,Chromatin organization,HDACs deacetylate histones,Hemostasis,Factors involved in megakaryocyte development and platelet production
135	Slc25a20	3	0	3	10	0.12585342	0.000109006	0.0141831	Fatty acid metabolism,Carnitine metabolism,Metabolism,Metabolism of lipids
136	Nln	1	3	3	10	0.12458955	8.88E-06	0.0022777	GPCR ligand binding,Signaling by GPCR,Peptide ligand-binding receptors,Class A/1 (Rhodopsin-like receptors),Signal Transduction
137	B3gntl1	0	3	3	8	0.123871	5.71E-05	0.003109335	O-linked glycosylation of mucins,O-linked glycosylation,Post-translational protein modification,Metabolism of proteins
138	Hmgcs2	3	0	3	10	0.122991625	0.000325009	0.000597173	Metabolism of lipids,Synthesis of Ketone Bodies,Ketone body metabolism,Metabolism
139	Uba5	0	3	3	8	0.12247845	3.68E-05	0.0001939	Adaptive Immune System,Immune System, Ubiquitination & Proteasome degradation,Class I MHC mediated antigen processing & presentation
140	C9	0	3	3	10	0.119203165	0.000660185	0.000666095	Innate Immune System,Immune System,Complement cascade,Terminal pathway of complement,Regulation of Complement cascade
141	Cps1	3	0	3	10	0.117338229	0.000172129	0.007086537	Metabolism,Urea cycle,Metabolism of amino acids and derivatives
142	Etfdh	3	0	3	10	0.1165741	0.000325009	0.000230013	Respiratory electron transport, ATP synthesis by chemiosmotic coupling, and heat production by uncoupling proteins.,The citric acid (TCA) cycle and respiratory electron transport,Metabolism,Respiratory electron transport
143	Mtnr1a	0	3	3	10	0.1159813	0.000180338	0.041643725	GPCR ligand binding,Class A/1 (Rhodopsin-like receptors),Signal Transduction,Signaling by GPCR,GPCR downstream signalling,G alpha (i) signalling events
144	Srebf1	0	3	3	10	0.114995106	3.15E-05	0.002108763	Metabolism,Regulation of cholesterol biosynthesis by SREBP (SREBF),Metabolism of lipids,Metabolism of steroids
145	Rgs3	3	0	3	10	0.11391005	0.000190781	0.004328507	Signaling by GPCR,GPCR downstream signalling,Signal Transduction,G alpha (q) signalling events,G alpha (i) signalling events
146	Mrc1	3	0	3	10	0.11386895	6.37E-05	0.000727607	Antigen processing-Cross presentation,Immune System,Class I MHC mediated antigen processing & presentation,Cross-presentation of soluble exogenous antigens (endosomes),Adaptive Immune System
147	Acad10	1	3	3	8	0.1132708	1.13E-05	3.24E-06	Metabolism of lipids,Fatty acid metabolism,Mitochondrial Fatty Acid Beta-Oxidation,Metabolism
148	Sdc4	1	3	3	10	0.11315135	3.90E-05	9.60E-07	Chondroitin sulfate/dermatan sulfate metabolism,Heparan sulfate/heparin (HS-GAG) metabolism,Metabolism,Glycosaminoglycan metabolism,A tetrasaccharide linker sequence is required for GAG synthesis,Metabolism of carbohydrates,HS-GAG biosynthesis,HS-GAG degradation,Hemostasis,Cell surface interactions at the vascular wall,Extracellular matrix organization,Syndecan interactions,Non-integrin membrane-…
149	Casp7	0	3	3	10	0.11294395	0.000187447	9.52E-07	Cytochrome c-mediated apoptotic response,Activation of caspases through apoptosome-mediated cleavage,Programmed Cell Death,Apoptotic factor-mediated response,Intrinsic Pathway for Apoptosis,Apoptosis,SMAC (DIABLO) binds to IAPs ,SMAC, XIAP-regulated apoptotic response,caspase complexes ,Apoptotic execution phase,Apoptotic cleavage of cellular proteins,Caspase-mediated cleavage of cytoskeletal pro…
150	Bri3	3	0	3	10	0.1121908	0.000425343	5.17E-07	Innate Immune System,Neutrophil degranulation,Immune System
151	F13b	3	0	3	10	0.112171445	9.33E-05	0.012395327	Formation of Fibrin Clot (Clotting Cascade),Hemostasis,Common Pathway of Fibrin Clot Formation
152	Dnmt3b	0	3	3	6	0.111446067	0.000577221	8.53E-06	Gene expression (Transcription),Epigenetic regulation of gene expression,PRC2 methylates histones and DNA,SUMOylation,SUMO E3 ligases SUMOylate target proteins,Post-translational protein modification,Metabolism of proteins,SUMOylation of DNA methylation proteins
153	Ercc3	0	3	3	10	0.110918175	5.37E-05	0.006206589	Formation of RNA Pol II elongation complex ,RNA Polymerase II Transcription Elongation,Gene expression (Transcription),RNA Polymerase II Transcription,Formation of the Early Elongation Complex,Nucleotide Excision Repair,DNA Repair,Global Genome Nucleotide Excision Repair (GG-NER),Formation of Incision Complex in GG-NER,Dual Incision in GG-NER,RNA Polymerase II Pre-transcription Events,Transcripti…
154	Pml	0	3	3	10	0.110324105	0.000414168	0.004710059	Metabolism of proteins,Post-translational protein modification,SUMOylation of DNA damage response and repair proteins,SUMOylation,SUMO E3 ligases SUMOylate target proteins,SUMOylation of ubiquitinylation proteins,Generic Transcription Pathway,Regulation of TP53 Activity,Transcriptional Regulation by TP53,RNA Polymerase II Transcription,Regulation of TP53 Activity through Acetylation,Gene expressi…
155	Agxt2	0	3	3	10	0.10949485	0.000365462	6.42E-06	Glyoxylate metabolism and glycine degradation,Metabolism,Metabolism of amino acids and derivatives
156	Slc35b4	3	0	3	10	0.109251315	0.000660185	0.001732609	Transport of vitamins, nucleosides, and related molecules,Transport of small molecules,Transport of nucleotide sugars,SLC-mediated transmembrane transport
157	B4galt1	3	1	3	10	0.1092396	4.60E-06	6.08E-07	Keratan sulfate/keratin metabolism,Keratan sulfate biosynthesis,Metabolism of carbohydrates,Metabolism,Glycosaminoglycan metabolism,Fertilization,Interaction With Cumulus Cells And The Zona Pellucida,Reproduction,Lactose synthesis,Innate Immune System,Neutrophil degranulation,Immune System,Metabolism of proteins,Transport to the Golgi and subsequent modification,N-Glycan antennae elongation,Aspar…
158	Wnt5b	0	3	3	8	0.10900965	0.000357165	4.18E-09	Signal Transduction,WNT ligand biogenesis and trafficking,Signaling by WNT,Beta-catenin independent WNT signaling,PCP/CE pathway
159	Slc22a5	3	0	3	10	0.1088448	5.37E-05	0.000252076	Fatty acid metabolism,Carnitine metabolism,Metabolism,Metabolism of lipids,Organic cation transport,Transport of small molecules,SLC-mediated transmembrane transport,Organic cation/anion/zwitterion transport,Transport of bile salts and organic acids, metal ions and amine compounds
160	Glud1	3	1	3	10	0.10769345	2.76E-05	0.000251188	Organelle biogenesis and maintenance,Mitochondrial biogenesis,Transcriptional activation of mitochondrial biogenesis,Metabolism of amino acids and derivatives,Glutamate and glutamine metabolism,Metabolism
161	Serinc3	3	0	3	10	0.106290615	0.000187447	0.000661518	Serine biosynthesis,Metabolism,Metabolism of amino acids and derivatives
162	Hps4	0	3	3	8	0.10604801	0.000725504	0.00019863	RAB GEFs exchange GTP for GDP on RABs,Vesicle-mediated transport,Rab regulation of trafficking,Membrane Trafficking
163	Tmc6	0	3	3	10	0.1050101	6.96E-05	9.98E-05	Innate Immune System,Neutrophil degranulation,Immune System
164	Asah2	0	3	3	10	0.10472386	0.000325009	7.91E-05	Glycosphingolipid metabolism,Sphingolipid metabolism,Metabolism,Metabolism of lipids
165	Rps21	3	1	3	10	0.10465155	3.87E-06	0.001941613	Eukaryotic Translation Initiation,Translation,Metabolism of proteins,L13a-mediated translational silencing of Ceruloplasmin expression,SRP-dependent cotranslational protein targeting to membrane,Major pathway of rRNA processing in the nucleolus and cytosol,Metabolism of RNA,rRNA processing in the nucleus and cytosol,rRNA processing,Cap-dependent Translation Initiation,Activation of the mRNA upon …
166	Mcm4	1	3	3	10	0.103284415	4.56E-06	0.000626685	Activation of ATR in response to replication stress,G2/M Checkpoints,Cell Cycle,Cell Cycle Checkpoints,Assembly of the pre-replicative complex,DNA Replication,DNA Replication Pre-Initiation,Synthesis of DNA,Cell Cycle, Mitotic,Switching of origins to a post-replicative state,Orc1 removal from chromatin,S Phase,Activation of the pre-replicative complex,Mitotic G1 phase and G1/S transition,G1/S Tra…
167	Mib2	0	3	3	8	0.101683465	4.26E-05	0.001827292	Adaptive Immune System,Immune System, Ubiquitination & Proteasome degradation,Class I MHC mediated antigen processing & presentation
168	Akr1b7	3	0	3	8	0.10111617	0.000736384	0.000779675	Metabolism,Metabolism of steroid hormones,Metabolism of steroids,Metabolism of lipids,Estrogen biosynthesis,Visual phototransduction,Sensory Perception,Retinoid metabolism and transport,Metabolism of fat-soluble vitamins,Metabolism of vitamins and cofactors
169	Rpl28	3	0	3	6	0.100945145	0.000408676	0.011200176	Eukaryotic Translation Initiation,Translation,Metabolism of proteins,L13a-mediated translational silencing of Ceruloplasmin expression,SRP-dependent cotranslational protein targeting to membrane,Major pathway of rRNA processing in the nucleolus and cytosol,Metabolism of RNA,rRNA processing in the nucleus and cytosol,rRNA processing,Formation of a pool of free 40S subunits,Cap-dependent Translatio…
170	Uaca	0	3	3	10	0.10080951	0.000187447	6.12E-08	Signal Transduction,RHO GTPase cycle,RHOH GTPase cycle,Signaling by Rho GTPases,Signaling by Rho GTPases, Miro GTPases and RHOBTB3
171	Daam1	0	3	3	10	0.100660365	0.000187447	0.000227749	Beta-catenin independent WNT signaling,Signal Transduction,Signaling by WNT,PCP/CE pathway,RHO GTPase Effectors,Signaling by Rho GTPases,Signaling by Rho GTPases, Miro GTPases and RHOBTB3,RHO GTPases Activate Formins,RHOA GTPase cycle,RHO GTPase cycle,RHOB GTPase cycle,RHOC GTPase cycle,CDC42 GTPase cycle
