# Supplementary material for: Impact of Maternal Obesity on Liver Disease in the Offspring: A Comprehensive Transcriptomic Analysis and Confirmation of Results in a Murine Model
Source: Biomedicines. 2022 Jan 27;10(2):294. doi: 10.3390/biomedicines10020294 (PMC8869223; doi:10.3390/biomedicines10020294)
Supplement: Supplementary file 1 [file biomedicines-10-00294-s001.zip › Supplementary Table S5_ExpressionGenesOfInterest.pdf]

**Supplemental Table S4:** Expression of previously identified molecular targets involved in the development and progression of chronic liver disease

| Gene         | Gene name                                        | Function                                                                                                                               | Main Associated pathways                                                                                      | Nb Comparison up | Nb Comparison down | Median logFC | Fisher's <i>p</i> -value |
|--------------|--------------------------------------------------|----------------------------------------------------------------------------------------------------------------------------------------|---------------------------------------------------------------------------------------------------------------|------------------|--------------------|--------------|--------------------------|
| <i>Pparg</i> | Peroxisome proliferator-activated receptor gamma | Nuclear receptor involved in critical metabolism regulations of various cell types, notably adipocyte differentiation.                 | <ul style="list-style-type: none"> <li>• MAPK-Erk</li> </ul>                                                  | 0                | 3                  | 0.268        | $1.8 \times 10^{-3}$     |
| <i>Tlr2</i>  | Toll-like receptor 2                             | Membrane surface receptor essential for pathogen recognition and innate immune response activation.                                    | <ul style="list-style-type: none"> <li>• NF-kappa-B</li> <li>• MAPK-Erk</li> </ul>                            | 0                | 2                  | 0.135        | $3.3 \times 10^{-2}$     |
| <i>Fgf21</i> | Fibroblast growth factor 21                      | Hepatokine involved in mitogenic activities. Major regulator of energy homeostasis.                                                    | <ul style="list-style-type: none"> <li>• MAPK-Erk</li> <li>• Insulin signaling</li> </ul>                     | 2                | 0                  | 0.131        | 0.079                    |
| <i>Fgfr1</i> | Fibroblast growth factor receptor 1              | Receptor tyrosine kinase that plays a fundamental role in embryogenesis and cell development.                                          | <ul style="list-style-type: none"> <li>• MAPK-Erk</li> <li>• PI3K/AKT</li> </ul>                              | 0                | 1                  | 0.064        | 0.092                    |
| <i>Rxra</i>  | Retinoid X receptor alpha                        | Transcriptional regulator protein involved in carcinogenesis and mineral and lipid metabolism.                                         | <ul style="list-style-type: none"> <li>• Calcium signaling</li> <li>• MAPK-Erk</li> <li>• PI3K/AKT</li> </ul> | 1                | 1                  | 0.061        | 0.127                    |
| <i>Casp6</i> | Caspase-6                                        | Apoptosis-related cysteinyl aspartate proteinase. Protein coding gene for cell death execution via activation cascades.                | <ul style="list-style-type: none"> <li>• Apoptosis</li> </ul>                                                 | 0                | 0                  | 0.111        | 0.080                    |
| <i>Tlr4</i>  | Toll-like receptor 4                             | Membrane surface receptor essential for pathogen recognition and innate immune response activation.                                    | <ul style="list-style-type: none"> <li>• NF-kappa-B</li> <li>• MAPK-Erk</li> </ul>                            | 0                | 0                  | 0.061        | 0.607                    |
| <i>Ppara</i> | Peroxisome proliferator-activated receptor alpha | Nuclear receptor regulating lipid metabolism and homeostasis in the liver. Important factor in fatty liver disease and carcinogenesis. | <ul style="list-style-type: none"> <li>• MAPK-Erk</li> </ul>                                                  | 0                | 0                  | 0.053        | 0.667                    |
| <i>Ppard</i> | Peroxisome proliferator-activated receptor delta | Nuclear receptor participating in energy metabolism regulations. Synergizes with RXR family.                                           | <ul style="list-style-type: none"> <li>• MAPK-Erk</li> </ul>                                                  | 0                | 0                  | 0.046        | 0.819                    |
| <i>Tnf</i>   | Tumor necrosis factor                            | Key cytokine of the inflammatory cascade and cell death regulation. Implicated in various autoimmune and metabolic diseases.           | <ul style="list-style-type: none"> <li>• NF-kappa-B</li> <li>• MAPK-Erk</li> </ul>                            | 0                | 0                  | 0.039        | 0.733                    |

Abbreviations: Nb comparison up: Number of Gene Enrichments sets in which the gene is upregulated; Nb comparison down: Number of Gene Enrichments sets in which the gene is downregulated; LogFC: log2 Fold Change
