# Supplementary material for: Impact of Maternal Obesity on Liver Disease in the Offspring: A Comprehensive Transcriptomic Analysis and Confirmation of Results in a Murine Model
Source: Biomedicines. 2022 Jan 27;10(2):294. doi: 10.3390/biomedicines10020294 (PMC8869223; doi:10.3390/biomedicines10020294)
Supplement: Supplementary file 1 [file biomedicines-10-00294-s001.zip › Supplementary Table S6_CompleteDataset.csv]

GEOSET	ID	symbol	logFC	CI.L	CI.R	AveExpr	t	P.Value	adj.P.Val	B
GSE133767	10598111		-0.14386875	-0.45074040883629	0.16300290883629	3.736096875	-0.990576057045005	0.336045158482211	0.999996701290797	-4.65058952859413
GSE133767	10401667	0610007P14Rik	-0.160377499999998	-0.481177223570119	0.160422223570122	3.641155	-1.05630075739854	0.305889989810343	0.999996701290797	-4.62498814147044
GSE133767	10385716	0610009B22Rik	-0.464331250000001	-1.31768699699123	0.389024496991232	3.433831875	-1.14967723736029	0.266494166481801	0.999996701290797	-4.58639010324384
GSE133767	10383342	0610009L18Rik	0.00197375000000033	-0.189295661295508	0.193243161295509	4.841579375	0.0218034269491843	0.982863453634688	0.999996701290797	-4.84721877188464
GSE133767	10455212	0610009O20Rik	-0.0755475000000003	-0.267595974463134	0.116500974463133	3.9021	-0.831165241003388	0.417619561042892	0.999996701290797	-4.7069441657668
GSE133767	10384691	0610010F05Rik	0.0465462500000002	-0.162932630110693	0.256025130110694	1.849645625	0.4694859409486	0.644800814436006	0.999996701290797	-4.80152949171039
GSE133767	10387807	0610010K14Rik	0.0219962500000008	-0.185145308856703	0.229137808856705	3.853066875	0.224367290870547	0.825196748900925	0.999996701290797	-4.83677560217566
GSE133767	10442914	0610011F06Rik	0.0457037499999995	-0.191011093860147	0.282418593860146	2.492343125	0.407947691897814	0.688500434124489	0.999996701290797	-4.81265747768983
GSE133767	10439018	0610012G03Rik	0.0220537499999995	-0.524138028583794	0.568245528583794	2.949036875	0.0853130415707951	0.933028134957316	0.999996701290797	-4.84579110298954
GSE133767	10506054	0610025J13Rik	-0.22259125	-0.506427752214575	0.0612452522145741	2.581483125	-1.65698271988664	0.116209739579185	0.999996701290797	-4.3379819922196
GSE133767	10539104	0610030E20Rik	0.0278199999999997	-0.205317566771161	0.26095756677116	2.393955	0.252129117345182	0.804021584158903	0.999996701290797	-4.8340135843463
GSE133767	10506743	0610037L13Rik	-0.0633125000000008	-0.468483725659961	0.34185872565996	2.37939	-0.3301634582062	0.745386798673056	0.999996701290797	-4.82455282801643
GSE133767	10572960	0610038B21Rik	-0.0232524999999999	-0.251541365274591	0.205036365274591	2.48461875	-0.215210303963271	0.832212651473873	0.999996701290797	-4.8376167381065
GSE133767	10478407	0610039K10Rik	-0.0718949999999996	-0.322013386666281	0.178223386666282	2.66928375	-0.607339051143041	0.551804697244517	0.999996701290797	-4.77122906140754
GSE133767	10522004	0610040J01Rik	-0.0641662500000004	-0.314046481713841	0.18571398171384	4.720573125	-0.542566401221441	0.594603953770868	0.999996701290797	-4.78637920754407
GSE133767	10537394	1110001J03Rik	-0.116772499999999	-0.413079884614383	0.179534884614385	3.1972275	-0.832676370038776	0.416790365325979	0.999996701290797	-4.70644973590928
GSE133767	10496405	1110002E22Rik	0.0658775	-0.133278610887807	0.265033610887807	2.70924625	0.698910572479053	0.494238443046924	0.999996701290797	-4.74712022703183
GSE133767	10399224	1110002L01Rik	-0.1042475	-0.566882957863262	0.358387957863261	3.8541725	-0.476107333101366	0.640174074796682	0.999996701290797	-4.80024282741233
GSE133767	10440840	1110004E09Rik	-0.0219612500000008	-0.695311743867111	0.651389243867109	2.778356875	-0.0689118660299935	0.945879121650103	0.999996701290797	-4.84632183105792
GSE133767	10556576	1110004F10Rik	0.38671	-0.129635339555839	0.903055339555839	4.17592875	1.58242552084045	0.132326599496397	0.999996701290797	-4.37799210086077
GSE133767	10409152	1110007C09Rik	0.00165000000000015	-0.174447753911806	0.177747753911806	3.80719625	0.0197974048710587	0.984439870463368	0.999996701290797	-4.84723629104345
GSE133767	10436800	1110008E08Rik	-0.19267125	-0.424378633966336	0.0390361339663362	2.913825625	-1.75693291157662	0.0972673493735437	0.999996701290797	-4.28282599934773
GSE133767	10477929	1110008F13Rik	-0.149101249999999	-0.94758685774074	0.649384357740741	3.958059375	-0.394541170824545	0.698180317089592	0.999996701290797	-4.81488156308771
GSE133767	10395807	1110008L16Rik	-0.00333624999999982	-0.210484888508078	0.203812388508078	1.954943125	-0.0340294273512975	0.973257573032027	0.999996701290797	-4.84707547598317
GSE133767	10481621	1110008P14Rik	-0.0592624999999996	-0.289211392219005	0.170686392219006	2.62105375	-0.544536234549662	0.593278215411241	0.999996701290797	-4.78594214022883
GSE133767	10371904	1110012L19Rik	-0.0639499999999993	-0.419477658653173	0.291577658653175	3.65214	-0.380053987338267	0.708701034546242	0.999996701290797	-4.81720382075408
GSE133767	10512254	1110017D15Rik	-0.14275625	-0.354050488506699	0.0685379885066989	3.374915625	-1.42753121463354	0.17188022725139	0.999996701290797	-4.45760593289405
GSE133767	10440717	1110025L11Rik	0.00747125000000004	-0.325262265138928	0.340204765138928	2.545945625	0.0474432965579794	0.962723320944033	0.999996701290797	-4.84684607843647
GSE133767	10593421	1110032A03Rik	0.0382675000000003	-0.297717312935309	0.37425231293531	2.44789875	0.240651504493845	0.812758068552024	0.999996701290797	-4.83519408528144
GSE133767	10492556	1110032F04Rik	-0.17663125	-0.486494324378419	0.133231824378419	3.671539375	-1.20441416383737	0.24524140766649	0.999996701290797	-4.56260706052454
GSE133767	10476349	1110034G24Rik	-0.0862399999999997	-0.341967387529929	0.16948738752993	2.15328	-0.71254064592345	0.485978513646201	0.999996701290797	-4.7432679456076
GSE133767	10551714	1110035H17Rik	-0.0212449999999995	-0.291962830348995	0.249472830348995	2.463235	-0.165812784292157	0.870297371361068	0.999996701290797	-4.84155414727269
GSE133767	10503283	1110037F02Rik	-0.10357125	-0.301850198518613	0.0947076985186129	2.351635625	-1.10367383780605	0.285402447888378	0.999996701290797	-4.60572442157486
GSE133767	10450365	1110038B12Rik	-0.00954250000000023	-0.464809158659169	0.445724158659169	3.6236375	-0.0442868162088487	0.96520162031212	0.999996701290797	-4.84690685284086
GSE133767	10425024	1110038F14Rik	0.0865337500000001	-0.11083995819168	0.28390745819168	4.574919375	0.926348411798931	0.36747447270941	0.999996701290797	-4.67429739624575
GSE133767	10485013	1110051M20Rik	-0.0212050000000006	-0.250715860744985	0.208305860744984	2.65747375	-0.195214994266899	0.847582703088246	0.999996701290797	-4.8393326505063
GSE133767	10394429	1110057K04Rik	-0.0983762499999994	-0.744477908947414	0.547725408947415	2.756235625	-0.321712210542259	0.751667100059282	0.999996701290797	-4.82569769308706
GSE133767	10436766	1110057P08Rik	0.0257824999999992	-0.205071799913658	0.256636799913656	2.72693875	0.235974565726222	0.816325426744291	0.999996701290797	-4.83565952640656
GSE133767	10353545	1110058L19Rik	-0.19597125	-0.506893422033118	0.114950922033117	2.600268125	-1.33173804589216	0.200858879357724	0.999996701290797	-4.50419491511509
GSE133767	10466676	1110059E24Rik	0.357482499999999	-0.469507625371296	1.18447262537129	3.16169125	0.913340255881818	0.374076586449018	0.999996701290797	-4.67893678095772
GSE133767	10597913	1110059G10Rik	0.0175312499999998	-0.175656362757917	0.210718862757917	1.678450625	0.191739567894016	0.850260863962508	0.999996701290797	-4.83961397006104
GSE133767	10516238	1110065P20Rik	0.0821037499999999	-0.163236157324407	0.327443657324407	4.435179375	0.707087132192179	0.489273568459962	0.999996701290797	-4.7448173711319
GSE133767	10595702	1190002N15Rik	-0.0963187500000002	-0.309730418245463	0.117092918245462	1.695058125	-0.95361003887319	0.353896815913069	0.999996701290797	-4.6643959804038
GSE133767	10582196	1190005I06Rik	-0.0668200000000008	-0.3244461127549	0.190806112754899	3.152	-0.54801787954815	0.590938618931002	0.999996701290797	-4.78516597628234
GSE133767	10371293	1190007I07Rik	-0.0451924999999993	-0.308783610329622	0.218398610329624	2.2851375	-0.362254462795338	0.721710578261059	0.999996701290797	-4.81994130061848
GSE133767	10378271	1200014J11Rik	0.11445	-0.250690952667708	0.479590952667708	3.1824075	0.662267418993009	0.51684616117876	0.999996701290797	-4.75714029764589
GSE133767	10596166	1300017J02Rik	0.0165425000000003	-0.175817410699475	0.208902410699476	2.27361	0.181704094512401	0.858004673911987	0.999996701290797	-4.84039812331381
GSE133767	10519181	1500002C15Rik	-0.0366825000000004	-0.242730556632346	0.169365556632345	4.94805125	-0.376156473886812	0.711541943913503	0.999996701290797	-4.8178141660222
GSE133767	10425723	1500009C09Rik	-0.10591875	-0.382805640913422	0.170968140913423	3.832173125	-0.808255352486682	0.43032049480598	0.999996701290797	-4.71434385460569
GSE133767	10532892	1500011B03Rik	-0.0502549999999986	-0.320519202442176	0.220009202442179	3.03363	-0.392888112864169	0.699377635426373	0.999996701290797	-4.81515080691586
GSE133767	10487476	1500011K16Rik	-0.0689699999999998	-0.364329743687835	0.226389743687836	2.2405425	-0.493386271194032	0.628172415776903	0.999996701290797	-4.79680409257262
GSE133767	10478847	1500012F01Rik	0.0057849999999986	-0.517929939722699	0.529499939722697	4.56151375	0.0233392307388225	0.981656603223329	0.999996701290797	-4.84720421745484
GSE133767	10461975	1500015L24Rik	-0.1046375	-0.3745228217463	0.165247821746301	2.337825	-0.819192989384641	0.424226501997795	0.999996701290797	-4.71083367344359
GSE133767	10345921	1500015O10Rik	0.0547337499999991	-0.178090292371747	0.287557792371746	2.747366875	0.496712988100207	0.625873867915764	0.999996701290797	-4.79612860442363
GSE133767	10520268	1500035N22Rik	-0.0104012500000004	-0.271730492330289	0.250927992330288	1.966208125	-0.0840960626920525	0.933981078074265	0.999996701290797	-4.84583435575245
GSE133767	10448316	1520401A03Rik	-0.0678787499999993	-0.28427829213198	0.148520792131982	3.345415625	-0.662759002811591	0.516539037048857	0.999996701290797	-4.75700914132325
GSE133767	10448495	1600002H07Rik	0.128363750000001	-0.102513271758952	0.359240771758953	2.708329375	1.17473476594118	0.256598713231511	0.999996701290797	-4.57560583981777
GSE133767	10364718	1600002K03Rik	-0.217802499999999	-0.562258096692567	0.126653096692569	3.7445175	-1.3360039806609	0.199490084413926	0.999996701290797	-4.50216663887637
GSE133767	10441919	1600012H06Rik	-0.00451625	-0.239193303375363	0.230160803375363	3.362418125	-0.0406616956431072	0.968048322310354	0.999996701290797	-4.84697149210416
GSE133767	10359293	1600012P17Rik	-0.0652512500000006	-0.343755868817355	0.213253368817354	3.362344375	-0.49503347875881	0.627033806837322	0.999996701290797	-4.79647016887379
GSE133767	10552252	1600014C10Rik	0.0399537500000005	-0.176479051036149	0.25638655103615	3.259991875	0.390043104971973	0.70144020055379	0.999996701290797	-4.81561162160003
GSE133767	10451195	1600014C23Rik	-0.276569999999999	-0.557101907600871	0.00396190760087378	3.0599825	-2.08305598350004	0.0529593635924118	0.999996701290797	-4.09314005794398
GSE133767	10600685	1600014K23Rik	-0.0109812499999991	-0.290489004979583	0.268526504979585	3.430023125	-0.0830110780791811	0.934830751580802	0.999996701290797	-4.84587239402117
GSE133767	10538169	1600015I10Rik	0.0228550000000007	-0.215178742411478	0.260888742411479	2.9025125	0.20287140556788	0.84168950167509	0.999996701290797	-4.83869520521145
GSE133767	10588109	1600029I14Rik	0.141495000000001	-0.0977017110913422	0.380691711091343	2.01947375	1.24986764824779	0.228600077892854	0.999996701290797	-4.54223764728507
GSE133767	10429389	1600029O15Rik	0.222062499999999	-0.839010162994107	1.2831351629941	7.27328	0.442189307108006	0.66403187792044	0.999996701290797	-4.80665107461408
GSE133767	10520501	1700001C02Rik	0.126392499999999	-0.0891169023642536	0.341901902364252	2.80937625	1.23917664283262	0.232433258469093	0.999996701290797	-4.5470781413799
GSE133767	10451559	1700001C19Rik	-0.0340874999999996	-0.271037171604891	0.202862171604892	2.0204025	-0.303960518788997	0.764916914280485	0.999996701290797	-4.82800763377606
GSE133767	10419119	1700001F09Rik	-0.26948	-0.616095242349801	0.0771352423498014	3.0085275	-1.6426953172268	0.119161288638961	0.999996701290797	-4.34572757545304
GSE133767	10535720	1700001J03Rik	-0.185281250000001	-0.448567182507312	0.0780046825073106	3.652431875	-1.48690065963872	0.155698730252697	0.999996701290797	-4.42768474442692
GSE133767	10402608	1700001K19Rik	0.192211249999999	-0.0816064902468521	0.466028990246851	2.700966875	1.48318511497139	0.156673102646991	0.999996701290797	-4.42957970322885
GSE133767	10430993	1700001L05Rik	0.0664887500000009	-0.186084104385071	0.319061604385073	2.907408125	0.556211076379875	0.585451307146631	0.999996701290797	-4.78332107002163
GSE133767	10405964	1700001L19Rik	0.11982875	-0.209753803669313	0.449411303669313	2.420751875	0.768201147968567	0.453106638519635	0.999996701290797	-4.7268425974141
GSE133767	10481499	1700001O22Rik	0.0165462500000011	-0.269690982416114	0.302783482416116	3.476206875	0.122138222408504	0.904248936914545	0.999996701290797	-4.84418899670349
GSE133767	10390498	1700001P01Rik	-0.0226462499999998	-0.262308192611724	0.217015692611724	1.829324375	-0.199652778900047	0.844165746403038	0.999996701290797	-4.83896614101093
GSE133767	10539358	1700003E16Rik	0.0440649999999998	-0.198726485705444	0.286856485705444	2.45918125	0.383476238756873	0.706210187164426	0.999996701290797	-4.81666285698593
GSE133767	10600750	1700003E24Rik	0.0658950000000003	-0.116692770710043	0.248482770710043	2.47173125	0.762533474247799	0.456390049997468	0.999996701290797	-4.72856563525606
GSE133767	10477551	1700003F12Rik	-0.0550299999999995	-0.27527108791158	0.165211087911581	5.05693875	-0.527933603825339	0.604498114271048	0.999996701290797	-4.78957905096056
GSE133767	10501953	1700003H04Rik	-0.0630800000000002	-0.255977918010752	0.129817918010751	1.32663875	-0.690943096045433	0.499104551298326	0.999996701290797	-4.7493407802803
GSE133767	10511984	1700003M02Rik	-0.0161987499999996	-0.244738933784263	0.212341433784263	2.158234375	-0.149760426372696	0.882749482763265	0.999996701290797	-4.84261508757534
GSE133767	10501942	1700006A11Rik	-0.0603962499999999	-0.249036060259957	0.128243560259957	1.867699375	-0.676479687198654	0.508008663177489	0.999996701290797	-4.75331245599236
GSE133767	10381506	1700006E09Rik	0.09355	-0.130085632042323	0.317185632042324	2.1318275	0.883854806259991	0.389336302278101	0.999996701290797	-4.68924645653589
GSE133767	10366645	1700006J14Rik	0.00872250000000019	-0.207350614517437	0.224795614517437	3.85384875	0.0852939806698036	0.933043059600717	0.999996701290797	-4.84579178521851
GSE133767	10572934	1700007B14Rik	-0.0119674999999999	-0.218902688014305	0.194967688014305	1.79539875	-0.122193253227422	0.904206022081021	0.999996701290797	-4.84418617795678
GSE133767	10523497	1700007G11Rik	0.0679912499999995	-0.192820883238145	0.328803383238144	1.604203125	0.550811972501452	0.589064401278531	0.999996701290797	-4.78453971442973
GSE133767	10568512	1700007K09Rik	-0.10267875	-0.393256438654	0.187898938654	2.977606875	-0.746614543331695	0.465690039399429	0.999996701290797	-4.73334421844013
GSE133767	10481272	1700007K13Rik	-0.0790987499999991	-0.340586387312989	0.18238888731299	3.452549375	-0.639140880543988	0.531410852904619	0.999996701290797	-4.76320933391957
GSE133767	10576680	1700008F21Rik	0.0693475000000001	-0.197699527280704	0.336394527280705	1.4742525	0.548682613549328	0.590492458146733	0.999996701290797	-4.78501725650317
GSE133767	10606820	1700008I05Rik	0.0561150000000004	-0.164139332555896	0.276369332555897	1.46023875	0.538310243988859	0.597473472525587	0.999996701290797	-4.78731845664072
GSE133767	10562767	1700008O03Rik	0.0113612500000002	-0.209104087030533	0.231826587030534	2.603373125	0.10888396745658	0.914593620142646	0.999996701290797	-4.84483100973451
GSE133767	10497181	1700008P02Rik	0.0225950000000004	-0.281135454308938	0.326325454308939	2.0334625	0.157181758489008	0.876988474307804	0.999996701290797	-4.84213794457108
GSE133767	10364331	1700009J07Rik	0.00928750000000012	-0.195606937386586	0.214181937386586	2.61406375	0.0957738169376121	0.924841407075528	0.999996701290797	-4.84539372753213
GSE133767	10503958	1700009N14Rik	0.129795	-0.135177575785769	0.394767575785768	1.67861125	1.03498766171418	0.315447204021535	0.999996701290797	-4.63343545738176
GSE133767	10351517	1700009P17Rik	-0.17180375	-0.457429861250714	0.113822361250714	3.041348125	-1.27090435891357	0.221201253243642	0.999996701290797	-4.5326257225113
GSE133767	10479074	1700010B08Rik	-0.00886999999999993	-0.277113751518039	0.259373751518039	5.16906875	-0.0698670075950345	0.945130271917474	0.999996701290797	-4.84629401576142
GSE133767	10600750	1700010D01Rik	0.0658950000000003	-0.116692770710043	0.248482770710043	2.47173125	0.762533474247799	0.456390049997468	0.999996701290797	-4.72856563525606
GSE133767	10531583	1700010H22Rik	-0.0473412500000006	-0.293782194595111	0.19909969459511	2.133353125	-0.40588686139441	0.689984844605716	0.999996701290797	-4.81300404426591
GSE133767	10441706	1700010I14Rik	-0.0776137499999994	-0.28802369303251	0.132796193032511	1.622081875	-0.779382313032068	0.446671989191476	0.999996701290797	-4.72341014344548
GSE133767	10554650	1700010L04Rik	-0.0539837500000004	-0.32398413090151	0.216016630901509	2.300173125	-0.422451454874317	0.678090743386702	0.999996701290797	-4.81017038559881
GSE133767	10427063	1700011A15Rik	0.15821875	-0.167981029592824	0.484418529592824	3.326199375	1.02483139929206	0.320076108003361	0.999996701290797	-4.63741210646103
GSE133767	10453443	1700011E24Rik	0.0492174999999997	-0.226186833772557	0.324621833772557	3.20341125	0.377595593233154	0.71049245328709	0.999996701290797	-4.81758951457915
GSE133767	10419392	1700011H14Rik	-0.0619712499999991	-0.305635309079184	0.181692809079186	2.762218125	-0.537374332750622	0.598105388794666	0.999996701290797	-4.78752405609151
GSE133767	10455866	1700011I03Rik	-0.133808749999999	-0.334388986080613	0.0667714860806143	1.618121875	-1.40953061375458	0.177049828453977	0.999996701290797	-4.46652350124849
GSE133767	10579845	1700011L22Rik	-0.0436225000000001	-0.271613467954015	0.184368467954014	3.73667	-0.404269564064292	0.691150692728501	0.999996701290797	-4.81327483193365
GSE133767	10537098	1700012A03Rik	0.0651562500000002	-0.250080974281025	0.380393474281026	2.288976875	0.436713606681411	0.667919469689098	0.999996701290797	-4.80764293187551
GSE133767	10392476	1700012B07Rik	-0.0779962500000004	-0.317305207784848	0.161312707784847	3.186580625	-0.688641045289139	0.50051568174079	0.999996701290797	-4.74997805223931
GSE133767	10590962	1700012B09Rik	-0.1270175	-0.442204369033884	0.188169369033884	2.01550375	-0.851478294742665	0.406562123260024	0.999996701290797	-4.70023265350746
GSE133767	10598646	1700012L04Rik	0.0851075000000008	-0.159738111007032	0.329953111007034	3.3307975	0.734435476875931	0.472882226595479	0.999996701290797	-4.73693915290468
GSE133767	10518209	1700012P22Rik	-0.1588375	-0.340736374462478	0.0230613744624784	2.05159375	-1.84502038294501	0.0828647655166666	0.999996701290797	-4.23292473147645
GSE133767	10547697	1700013D24Rik	0.1403925	-0.0999608467533127	0.380745846753313	2.016145	1.23416114998895	0.234248603974593	0.999996701290797	-4.5493385708287
GSE133767	10495332	1700013F07Rik	-0.077715	-0.284059078110975	0.128629078110975	2.82104	-0.795776260297411	0.437340726321682	0.999996701290797	-4.71829805739631
GSE133767	10509277	1700013G24Rik	-0.11078125	-0.37345001481611	0.151887514816111	2.886079375	-0.89111953971502	0.385538619290263	0.999996701290797	-4.68673307932827
GSE133767	10604643	1700013H16Rik	0.2051475	-0.300037816028762	0.710332816028761	1.64512	0.858012564308598	0.403046081386075	0.999996701290797	-4.69804386790932
GSE133767	10409796	1700014D04Rik	-0.1155475	-0.397211095696584	0.166116095696584	1.9988	-0.866778183156019	0.398360710362306	0.999996701290797	-4.69508497409643
GSE133767	10351482	1700015E13Rik	-0.1726025	-0.368038544976667	0.0228335449766658	3.21165375	-1.86603830217225	0.0797198296566038	0.999996701290797	-4.22085574349572
GSE133767	10352097	1700016C15Rik	-0.11690625	-0.351676987358691	0.117864487358692	2.796339375	-1.05213605437385	0.307740877313818	0.999996701290797	-4.62664962050842
GSE133767	10577057	1700016D06Rik	0.0359000000000005	-0.268865996330566	0.340665996330567	1.4046425	0.248889213905666	0.806485069718031	0.999996701290797	-4.83435232153908
GSE133767	10531894	1700016H13Rik	-0.14972875	-0.392532728406075	0.093075228406074	2.359994375	-1.30294936240846	0.210292579050532	0.999996701290797	-4.5177653319831
GSE133767	10378749	1700016K19Rik	-0.0340812500000007	-0.332803174839334	0.264640674839333	4.059429375	-0.241060777665186	0.812446093988353	0.999996701290797	-4.83515292524405
GSE133767	10593913	1700017B05Rik	-0.0543299999999989	-0.276094412620943	0.167434412620946	3.63610375	-0.517637805990893	0.611507794041757	0.999996701290797	-4.79178082335461
GSE133767	10466139	1700017D01Rik	-0.18762125	-0.456117806287021	0.0808753062870213	1.603515625	-1.47645917335651	0.158449762174319	0.999996701290797	-4.43300250841041
GSE133767	10497937	1700017G19Rik	-0.124425	-0.351243860333091	0.10239386033309	2.0153675	-1.15906188003164	0.262754973080789	0.999996701290797	-4.58237176935215
GSE133767	10366131	1700017N19Rik	-0.0632174999999995	-0.322606670067696	0.196171670067697	2.2171275	-0.51494828356607	0.61334535886344	0.999996701290797	-4.79234920368189
GSE133767	10408525	1700018A04Rik	0.07037125	-0.111774715189915	0.252517215189915	1.716070625	0.8163076139252	0.425828741489347	0.999996701290797	-4.71176368343636
GSE133767	10582221	1700018B08Rik	0.0189475000000003	-0.188287194974151	0.226182194974152	3.29341	0.19318241315809	0.849148777419956	0.999996701290797	-4.83949778754442
GSE133767	10498002	1700018B24Rik	-0.0971337499999998	-0.337655561378694	0.143388061378694	2.056890625	-0.85328444177213	0.4055882549489	0.999996701290797	-4.69962909510022
GSE133767	10513715	1700018C11Rik	0.0444637499999998	-0.155436408406507	0.244363908406506	2.784655625	0.469971028542894	0.644461342889883	0.999996701290797	-4.80143581568161
GSE133767	10527427	1700018F24Rik	0.0905325000000001	-0.209608664379937	0.390673664379937	2.0293475	0.637319325081805	0.532567627904278	0.999996701290797	-4.76367891208565
GSE133767	10505198	1700018M17Rik	-0.0892587499999999	-0.298395930922964	0.119878430922964	5.490573125	-0.90177395572799	0.380013810270267	0.999996701290797	-4.68301526207157
GSE133767	10354534	1700019A02Rik	-0.0148899999999998	-0.248304300779175	0.218524300779175	1.4913025	-0.134786182842427	0.894393949489697	0.999996701290797	-4.84350786827624
GSE133767	10569757	1700019B03Rik	0.166875	-0.0530107820673267	0.386760782067326	2.2800425	1.60351219592982	0.127586610930595	0.999996701290797	-4.36678049147953
GSE133767	10354529	1700019D03Rik	-0.00766750000000038	-0.22548818122236	0.210153181222359	1.90653125	-0.0743759986342513	0.941595861509565	0.999996701290797	-4.84615754161546
GSE133767	10545886	1700019G17Rik	0.0176699999999999	-0.30731309284387	0.34265309284387	2.793485	0.114882510954619	0.909909801708323	0.999996701290797	-4.84454955306312
GSE133767	10481700	1700019L03Rik	0.1556525	-0.0555435035545712	0.36684850355457	2.40649625	1.55721486898322	0.13818814311425	0.999996701290797	-4.3912843449812
GSE133767	10401950	1700019M22Rik	0.10005875	-0.186285424192196	0.386402924192197	1.946746875	0.738320383800616	0.470580818590325	0.999996701290797	-4.73579819726556
GSE133767	10468738	1700019N19Rik	-0.2669525	-0.494930549147246	-0.0389744508527546	2.88043	-2.47411052404596	0.0244216949793074	0.999996701290797	-3.85337819155886
GSE133767	10348074	1700019O17Rik	-0.0460699999999998	-0.258177667244849	0.166037667244849	3.94221125	-0.458923166918935	0.652212751364274	0.999996701290797	-4.80354628192729
GSE133767	10476130	1700020A23Rik	-0.0915612499999998	-0.281458012374005	0.0983355123740049	2.324275625	-1.01876095060847	0.322865880762424	0.999996701290797	-4.63977383359423
GSE133767	10379685	1700020L24Rik	-0.169812499999998	-0.397248901294713	0.0576239012947168	3.60926125	-1.57756701850441	0.133439591988681	0.999996701290797	-4.38056331563676
GSE133767	10362064	1700020N01Rik	0.0650462500000004	-0.150900854802711	0.280993354802712	3.240808125	0.636433476303497	0.533130686964496	0.999996701290797	-4.76390682744853
GSE133767	10599948	1700020N15Rik	-0.0320162500000003	-0.294173694528212	0.230141194528211	3.421063125	-0.258039626626309	0.799532972405354	0.999996701290797	-4.83338448473143
GSE133767	10362062	1700021A07Rik	-0.0128974999999993	-0.273185267616124	0.247390267616125	3.88142	-0.104695957993555	0.917865658656289	0.999996701290797	-4.84501858927376
GSE133767	10368930	1700021F05Rik	0.8228925	-0.290583669022915	1.93636866902292	4.36268625	1.56149398201865	0.137178102210959	0.999996701290797	-4.38903692661144
GSE133767	10479058	1700021F07Rik	-0.0508312500000003	-0.238211054111373	0.136548554111372	3.016340625	-0.573173557029615	0.574173641404835	0.999996701290797	-4.77941973332327
GSE133767	10439092	1700021K19Rik	0.00501750000000012	-0.234333312266032	0.244368312266032	2.6421775	0.044292542725138	0.96519712381776	0.999996701290797	-4.84690674636902
GSE133767	10462127	1700021P04Rik	-0.0450474999999999	-0.301580964444638	0.211485964444638	2.13374	-0.371026393553062	0.715287947053163	0.999996701290797	-4.81860819601444
GSE133767	10520247	1700022A21Rik	-0.0958762499999999	-0.31626208577193	0.12450958577193	3.872881875	-0.919190437202301	0.371097545474961	0.999996701290797	-4.67685715481594
GSE133767	10504230	1700022I11Rik	-0.1304775	-0.295019202507421	0.0340642025074206	1.94032125	-1.67547432659317	0.112482937248524	0.999996701290797	-4.32790396336401
GSE133767	10522702	1700023E05Rik	-0.19510625	-0.500191195959621	0.109978695959621	2.358428125	-1.35122770283714	0.194665879966955	0.999996701290797	-4.49489228070162
GSE133767	10391854	1700023F06Rik	0.0183824999999991	-0.229224757946519	0.265989757946517	3.75240375	0.156862575444741	0.877236104771695	0.999996701290797	-4.8421589385847
GSE133767	10536973	1700023L04Rik	0.0367899999999999	-0.177327218270197	0.250907218270197	2.81659375	0.363041549813613	0.72113340444776	0.999996701290797	-4.81982295334107
GSE133767	10414245	1700024B05Rik	-0.108666250000002	-0.333464581710518	0.116132081710515	3.203664375	-1.02136208861239	0.321668372200967	0.999996701290797	-4.63876324326556
GSE133767	10418812	1700024G13Rik	0.0850675000000001	-0.148911459086254	0.319046459086254	2.2598075	0.768183549237397	0.453116811280096	0.999996701290797	-4.72684796521078
GSE133767	10385555	1700024J04Rik	-0.0934674999999996	-0.385751837433177	0.198816837433178	3.056935	-0.675667796774069	0.50851117363486	0.999996701290797	-4.75353312814008
GSE133767	10411502	1700024P04Rik	-0.167197500000001	-0.50224897072001	0.167853970720009	1.93020625	-1.05437812728589	0.306743446305243	0.999996701290797	-4.62575581188053
GSE133767	10506470	1700024P16Rik	-0.173756250000001	-0.403173926572037	0.0556614265720359	1.861041875	-1.60026422065126	0.128307190240477	0.999996701290797	-4.36851288683165
GSE133767	10466147	1700025F22Rik	-0.0561362499999998	-0.26337872946861	0.15110622946861	1.270999375	-0.57232505055712	0.574735101933551	0.999996701290797	-4.77961750236006
GSE133767	10358717	1700025G04Rik	0.146356249999999	-0.2408884511314	0.533600951131399	4.212944375	0.798553333132861	0.43577225683656	0.999996701290797	-4.71742278439501
GSE133767	10511814	1700025O08Rik	-0.000997499999999762	-0.191583709648646	0.189588709648646	1.51769375	-0.011058585209949	0.991307890301816	0.999996701290797	-4.84729289869817
GSE133767	10565241	1700026D08Rik	0.2041325	-0.0231747031011135	0.431439703101114	2.1246	1.89747950373748	0.0752128458450741	0.999996701290797	-4.20269245902731
GSE133767	10481312	1700026L06Rik	0.0575024999999991	-0.12577403616803	0.240779036168028	2.96976125	0.662915228257038	0.516441454566548	0.999996701290797	-4.75696744112032
GSE133767	10430433	1700027A07Rik	-0.194825	-0.416633929021383	0.0269839290213829	3.11954	-1.85585395724618	0.08123027013689	0.999996701290797	-4.2267112811175
GSE133767	10365282	1700028I16Rik	-0.00700000000000012	-0.218695495883046	0.204695495883046	2.82581	-0.069865787622852	0.945131228365988	0.999996701290797	-4.846294051533
GSE133767	10562736	1700028J19Rik	-0.12499125	-0.371096215174236	0.121113715174236	4.645608125	-1.07309302720615	0.298508934883849	0.999996701290797	-4.61823608271816
GSE133767	10523865	1700028K03Rik	0.0342687499999998	-0.164206554833475	0.232744054833475	2.080874375	0.364812678247577	0.719835264080037	0.999996701290797	-4.81955572893425
GSE133767	10391870	1700028N14Rik	0.0977887500000008	-0.0810651889231362	0.276642688923138	2.895813125	1.15523017123554	0.264276867226066	0.999996701290797	-4.58401543604478
GSE133767	10466728	1700028P14Rik	-0.0574387499999998	-0.316718754854833	0.201841254854833	1.751558125	-0.468073539843052	0.645789694232975	0.999996701290797	-4.80180171485108
GSE133767	10411353	1700029F12Rik	0.0438974999999999	-0.279914342454521	0.367709342454521	2.69289875	0.286434414949594	0.778072506300291	0.999996701290797	-4.83016184203604
GSE133767	10577179	1700029H14Rik	0.0553649999999997	-0.200508690218014	0.311238690218013	2.07119	0.457180616492908	0.653439145917321	0.999996701290797	-4.80387476188819
GSE133767	10474041	1700029I15Rik	-0.0198499999999999	-0.235358813027252	0.195658813027252	4.8075425	-0.194613791369995	0.848045853087765	0.999996701290797	-4.83938167393538
GSE133767	10578504	1700029J07Rik	-0.13589625	-0.315077626516797	0.0432851265167982	2.188618125	-1.60248045537623	0.127815134478158	0.999996701290797	-4.36733101258339
GSE133767	10509049	1700029M20Rik	-0.22262	-0.61294484902457	0.167704849024569	2.89047625	-1.20508065622871	0.244990850408358	0.999996701290797	-4.56231238741358
GSE133767	10425630	1700029P11Rik	0.0799675000000004	-0.510467707081083	0.670402707081084	4.323815	0.286166907403616	0.778273856035054	0.999996701290797	-4.83019374759361
GSE133767	10399579	1700030C10Rik	-0.0158062500000007	-0.249641917456263	0.218029417456262	4.243916875	-0.142822367600932	0.888141477280734	0.999996701290797	-4.84304037908329
GSE133767	10374704	1700030C12Rik	-0.0865712500000002	-0.253371250684319	0.0802287506843186	1.330715625	-1.09661902857776	0.288387757230489	0.999996701290797	-4.60863523454205
GSE133767	10582014	1700030J22Rik	-0.103799999999999	-0.338651417552179	0.131051417552181	3.11429125	-0.933861142213998	0.363697798510983	0.999996701290797	-4.67159280589294
GSE133767	10572804	1700030K09Rik	-0.0260824999999998	-0.325514959584085	0.273349959584085	2.77496125	-0.184046886795564	0.856195505949636	0.999996701290797	-4.84021880794043
GSE133767	10606146	1700031F05Rik	0.1021475	-0.258581729742451	0.462876729742451	5.26081875	0.598307634866951	0.557672114414061	0.999996701290797	-4.77343723358244
GSE133767	10546098	1700031F10Rik	-0.0354387499999995	-0.328055195951496	0.257177695951497	3.599036875	-0.255892643667949	0.801162626236119	0.999996701290797	-4.8336146688546
GSE133767	10455714	1700034E13Rik	-0.0178562499999999	-0.256523474309599	0.220810974309599	1.834770625	-0.158079521507974	0.87629203711587	0.999996701290797	-4.84207866718369
GSE133767	10361135	1700034H15Rik	-0.0780849999999988	-0.336458391219113	0.180288391219115	2.53295375	-0.638554495045283	0.531783083910109	0.999996701290797	-4.76336063308272
GSE133767	10497958	1700034I23Rik	0.026254999999999	-0.28000184642888	0.332511846428878	3.3296775	0.181135825084563	0.858443630217541	0.999996701290797	-4.84044127420328
GSE133767	10549377	1700034J05Rik	-0.00519625000000001	-0.193040584194879	0.182648084194879	1.917328125	-0.0584480564710516	0.954086217622935	0.999996701290797	-4.84660150099808
GSE133767	10537676	1700034O15Rik	-0.0255400000000006	-0.287021326308784	0.235941326308783	1.63108875	-0.206375601006283	0.838995499189467	0.999996701290797	-4.8383953436709
GSE133767	10586015	1700036A12Rik	-0.11183875	-0.263090292210739	0.039412792210739	3.203010625	-1.56232229404452	0.136983307183018	0.999996701290797	-4.38860147624084
GSE133767	10437263	1700037C18Rik	-0.0552687500000011	-0.300235938086333	0.189698438086331	3.087998125	-0.476705170609988	0.639757079245162	0.999996701290797	-4.8001258071241
GSE133767	10487847	1700037H04Rik	0.105535	-0.160874358170536	0.371944358170535	2.74134625	0.836999455555711	0.414424037524182	0.999996701290797	-4.7050309368501
GSE133767	10552902	1700039E15Rik	0.156928750000001	-0.132021027583151	0.445878527583153	3.783506875	1.14751478059533	0.267361411745772	0.999996701290797	-4.58731250267119
GSE133767	10369806	1700040L02Rik	-0.0384474999999997	-0.285001445630927	0.208106445630928	2.12669125	-0.329483966709122	0.745891067491523	0.999996701290797	-4.82464595156237
GSE133767	10570870	1700041G16Rik	-0.10322875	-0.317409260351246	0.110951760351246	2.174539375	-1.01835419479944	0.323053429126816	0.999996701290797	-4.6399316769787
GSE133767	10607459	1700042B14Rik	-0.113707499999999	-0.375131905794641	0.147716905794642	1.6782525	-0.91901186586853	0.371188239473811	0.999996701290797	-4.67692079942775
GSE133767	10395805	1700047I17Rik2	-0.230036249999997	-0.546388996888438	0.0863164968884446	6.983974375	-1.53639472245657	0.143192149014908	0.999996701290797	-4.40216742685934
GSE133767	10590433	1700048O20Rik	0.00297624999999968	-0.257798467591728	0.263750967591727	2.321153125	0.0241147110214786	0.981047240074022	0.999996701290797	-4.84719649219362
GSE133767	10414245	1700049E17Rik1	-0.108666250000002	-0.333464581710518	0.116132081710515	3.203664375	-1.02136208861239	0.321668372200967	0.999996701290797	-4.63876324326556
GSE133767	10414245	1700049E17Rik2	-0.108666250000002	-0.333464581710518	0.116132081710515	3.203664375	-1.02136208861239	0.321668372200967	0.999996701290797	-4.63876324326556
GSE133767	10551426	1700049G17Rik	-0.26051875	-1.0738791980236	0.552841698023599	2.209304375	-0.676759051701025	0.507835819472021	0.999996701290797	-4.75323646859517
GSE133767	10449289	1700049J03Rik	-0.0391587500000004	-0.319682877567547	0.241365377567546	4.063579375	-0.294942078844337	0.771677450835103	0.999996701290797	-4.82913183608259
GSE133767	10369894	1700049L16Rik	-0.117002499999999	-0.40349769483092	0.169492694830923	3.22888375	-0.862890994316868	0.400434043187238	0.999996701290797	-4.69640032053389
GSE133767	10367626	1700052N19Rik	0.0776887499999992	-0.0899120686291599	0.245289568629158	2.561970625	0.979400080704754	0.341374418691817	0.999996701290797	-4.65480935350329
GSE133767	10504514	1700055D18Rik	-0.0836349999999999	-0.337928935325707	0.170658935325708	1.8205475	-0.694912615110596	0.496676712230569	0.999996701290797	-4.74823736047962
GSE133767	10460255	1700055N04Rik	-0.3304425	-0.760998554167638	0.100113554167638	3.9603025	-1.62160224196607	0.123635834821615	0.999996701290797	-4.35709574204035
GSE133767	10360832	1700056E22Rik	-0.0709787499999992	-0.355030959202667	0.213073459202669	2.470059375	-0.527968865369878	0.604474174942944	0.999996701290797	-4.78957143961543
GSE133767	10587810	1700057G04Rik	0.01751375	-0.237329982252774	0.272357482252774	2.785764375	0.145205586906824	0.886288678528324	0.999996701290797	-4.84289655665318
GSE133767	10446190	1700061G19Rik	0.178473750000001	-0.152424322723024	0.509371822723025	1.730931875	1.13961524029055	0.270547495934978	0.999996701290797	-4.59067079014295
GSE133767	10501744	1700061I17Rik	0.06980875	-0.283588488322201	0.423205988322201	2.270646875	0.417373477183539	0.681727834757447	0.999996701290797	-4.81105071013439
GSE133767	10541491	1700063H04Rik	-0.1133175	-0.307552084289534	0.0809170842895345	2.21979	-1.23267492428137	0.234788641008142	0.999996701290797	-4.55000711537276
GSE133767	10595787	1700065D16Rik	-0.0118112499999998	-0.245719055261326	0.222096555261326	1.890913125	-0.106691368380813	0.916306476638789	0.999996701290797	-4.84493013100868
GSE133767	10454836	1700066B19Rik	0.036813749999999	-0.198811726729333	0.272439226729331	3.560770625	0.3301155253845	0.745422366999822	0.999996701290797	-4.82455940331423
GSE133767	10346337	1700066M21Rik	0.173635	-0.11105488422571	0.45832488422571	5.02749875	1.28867490937146	0.21509829601537	0.999996701290797	-4.52441715783465
GSE133767	10573281	1700067K01Rik	-0.186615	-0.450967911146422	0.0777379111464229	2.9823375	-1.49155952228674	0.154484078803773	0.999996701290797	-4.42530455038772
GSE133767	10445743	1700067P10Rik	-0.216141249999999	-0.503116694244778	0.0708341942447798	2.173426875	-1.59136960631619	0.130298196846685	0.999996701290797	-4.37324689992369
GSE133767	10557109	1700069B07Rik	-0.0579474999999996	-0.326029779769653	0.210134779769654	3.5446275	-0.456714429870347	0.653767418343267	0.999996701290797	-4.80396243708685
GSE133767	10532716	1700069L16Rik	0.0791949999999995	-0.235281126187595	0.393671126187594	3.497065	0.532093825498919	0.601676920370537	0.999996701290797	-4.78867772922487
GSE133767	10389062	1700071K01Rik	-0.105309999999999	-0.407632801109574	0.197012801109576	3.15529875	-0.735998361053695	0.471955565844782	0.999996701290797	-4.73648080081465
GSE133767	10542724	1700073E17Rik	-0.0819437500000002	-0.33760806932488	0.17372056932488	2.141270625	-0.677210760448695	0.507556417152793	0.999996701290797	-4.75311354274611
GSE133767	10544307	1700074P13Rik	0.0328324999999996	-0.189456363749778	0.255121363749777	1.59822625	0.312078884015969	0.758847774040682	0.999996701290797	-4.82696719205369
GSE133767	10596322	1700080E11Rik	0.00408499999999989	-0.143300708042886	0.151470708042886	2.539345	0.0585618551426986	0.953996931396268	0.999996701290797	-4.8465987064566
GSE133767	10604557	1700080O16Rik	0.1052375	-0.141605148981666	0.352080148981666	2.14195	0.900800174027329	0.380516545302004	0.999996701290797	-4.68335662053688
GSE133767	10351465	1700084C01Rik	-0.01129625	-0.313175118501631	0.290582618501631	2.572955625	-0.0790641705258794	0.937922331311225	0.999996701290797	-4.8460066065135
GSE133767	10583548	1700084C06Rik	0.173485	-0.101533551032577	0.448503551032578	2.6544625	1.33284018465432	0.200504525246986	0.999996701290797	-4.5036713201178
GSE133767	10481451	1700084E18Rik	-0.10701625	-0.392383078988211	0.178350578988211	4.557429375	-0.792363344622287	0.439273168145553	0.999996701290797	-4.71937004948645
GSE133767	10428066	1700084J12Rik	-0.0722437499999999	-0.386173693471825	0.241686193471825	1.999253125	-0.486234395008364	0.633127234539475	0.999996701290797	-4.79824161130827
GSE133767	10600750	1700084M14Rik	0.0658950000000003	-0.116692770710043	0.248482770710043	2.47173125	0.762533474247799	0.456390049997468	0.999996701290797	-4.72856563525606
GSE133767	10386992	1700086D15Rik	-0.21037125	-0.444363170317465	0.0236206703174649	1.712571875	-1.89960657081152	0.0749162928478925	0.999996701290797	-4.2014590838317
GSE133767	10396466	1700086L19Rik	0.19313375	-0.111455799864877	0.497723299864877	2.941559375	1.33974242833855	0.198296667575913	0.999996701290797	-4.50038550751281
GSE133767	10458538	1700086O06Rik	-0.109474999999999	-0.365545200106396	0.146595200106399	4.2194975	-0.90330424313554	0.379224668746773	0.999996701290797	-4.68247818774978
GSE133767	10430447	1700088E04Rik	-0.0400887499999993	-0.234331072075848	0.154153572075849	3.068683125	-0.436070583379701	0.66837663981341	0.999996701290797	-4.80775862652705
GSE133767	10469693	1700092C17Rik	0.00529500000000027	-0.264520662322675	0.275110662322675	2.0476275	0.041464548960301	0.967417825163018	0.999996701290797	-4.84695765193524
GSE133767	10437171	1700093J21Rik	0.0536225000000004	-0.142216181937031	0.249461181937032	3.933655	0.578531109886623	0.570635087832658	0.999996701290797	-4.77816465879552
GSE133767	10384685	1700093K21Rik	-0.124591250000001	-0.361722215093766	0.112539715093764	2.208094375	-1.11013913156985	0.28268668455009	0.999996701290797	-4.60304407402354
GSE133767	10481337	1700101E01Rik	0.0034449999999997	-0.335797343735044	0.342687343735043	2.85045	0.021456422313114	0.983136139486351	0.999996701290797	-4.84722192321821
GSE133767	10353792	1700101I19Rik	-0.0946762499999987	-0.298025216477517	0.10867271647752	3.622861875	-0.983732943944814	0.339301319256101	0.999996701290797	-4.65317802485602
GSE133767	10588927	1700102P08Rik	-0.0956324999999998	-0.356045642001169	0.164780642001169	2.539135	-0.775926793725811	0.448654522410931	0.999996701290797	-4.72447563960896
GSE133767	10578120	1700104B16Rik	0.0115412500000009	-0.34012514302417	0.363207643024172	2.959199375	0.0693425995789173	0.945541411584907	0.999996701290797	-4.84630933474241
GSE133767	10380244	1700106J16Rik	-0.142004999999999	-0.489841306585524	0.205831306585526	3.1965825	-0.862594853039243	0.40059228763027	0.999996701290797	-4.69650031991806
GSE133767	10519346	1700109H08Rik	0.0545924999999998	-0.187053137538828	0.296238137538827	1.51447125	0.477344761493101	0.639311098019599	0.999996701290797	-4.80000045849908
GSE133767	10417498	1700110I01Rik	-0.0559849999999997	-0.324253615189586	0.212283615189586	2.5286975	-0.440940461573724	0.664917659175865	0.999996701290797	-4.80687833573302
GSE133767	10537300	1700111E14Rik	0.104038750000001	-0.144162860289289	0.352240360289291	1.484314375	0.885663339285393	0.388388564137847	0.999996701290797	-4.68862240283196
GSE133767	10413152	1700112E06Rik	0.0576762500000001	-0.266509937620344	0.381862437620345	2.127855625	0.375907201341065	0.711723788884226	0.999996701290797	-4.81785299351235
GSE133767	10365537	1700113H08Rik	0.0429074999999988	-0.238991574057394	0.324806574057391	3.00913625	0.321601228495364	0.75174969390891	0.999996701290797	-4.82571253397714
GSE133767	10436206	1700116B05Rik	-0.0922237499999996	-0.336103442305065	0.151655942305066	3.833101875	-0.798997234925548	0.435521873217001	0.999996701290797	-4.71728262707579
GSE133767	10369735	1700120B22Rik	-0.12923375	-0.350477567025128	0.0920100670251285	2.639401875	-1.23419260876021	0.234237183463	0.999996701290797	-4.54932441348136
GSE133767	10451637	1700122O11Rik	-0.23441	-0.560733297407882	0.0919132974078828	2.37028125	-1.51777079330754	0.147796043666672	0.999996701290797	-4.41182855234079
GSE133767	10460771	1700123I01Rik	-0.0855375000000014	-0.362545466565688	0.191470466565685	3.38043625	-0.652442782190645	0.523005854043575	0.999996701290797	-4.75974279817116
GSE133767	10535027	1700123K08Rik	-0.0173612500000004	-0.273114632472523	0.238392132472522	3.181949375	-0.143429254794381	0.887669597966406	0.999996701290797	-4.84300397965206
GSE133767	10546551	1700123L14Rik	0.0382775	-0.182414363727969	0.258969363727969	2.37234	0.366467427999291	0.718623219569069	0.999996701290797	-4.8193049183201
GSE133767	10415095	1700123O20Rik	-0.0496399999999992	-0.269681662304681	0.170401662304683	3.23556125	-0.476655921814317	0.639791425905811	0.999996701290797	-4.80013545235895
GSE133767	10379880	1700125H20Rik	0.0927075000000004	-0.0969077182945988	0.2823227182946	1.77085875	1.03304637173339	0.316328253334436	0.999996701290797	-4.63419800584947
GSE133767	10570141	1700128E19Rik	-0.0682	-0.346281927869699	0.209881927869699	2.18544125	-0.518190857355243	0.611130262521314	0.999996701290797	-4.79166359788422
GSE133767	10583159	1700128F08Rik	-0.17290625	-0.473554819342834	0.127742319342834	2.229236875	-1.21514943022747	0.241229482599438	0.999996701290797	-4.55784608850271
GSE133767	10420472	1700129C05Rik	-0.0757112499999999	-0.396169652072242	0.244747152072242	2.913520625	-0.499191165717752	0.6241641813586	0.999996701290797	-4.79562259999436
GSE133767	10461268	1810009A15Rik	0.152422499999999	-0.16508187694394	0.469926876943939	3.2431125	1.01432586778255	0.324915011260346	0.999996701290797	-4.64149212622858
GSE133767	10544320	1810009J06Rik	-0.0262762500000004	-0.288165003987418	0.235612503987417	2.235636875	-0.211994538757666	0.834680008414567	0.999996701290797	-4.83790388954403
GSE133767	10382136	1810010H24Rik	-0.0787437500000014	-0.311742094734195	0.154254594734192	3.218345625	-0.714070998423613	0.485056222944922	0.999996701290797	-4.74283121360383
GSE133767	10469568	1810010K12Rik	-0.1918625	-0.601331819557475	0.217606819557474	2.45922	-0.990026614154246	0.336305786826258	0.999996701290797	-4.65079790642052
GSE133767	10413928	1810011H11Rik	0.018205	-0.192852382904809	0.229262382904809	2.26455	0.182250308408075	0.857582799457824	0.999996701290797	-4.84035652059834
GSE133767	10577641	1810011O10Rik	0.169444999999999	-0.0389763468434124	0.377866346843411	2.16652625	1.7177687487533	0.104343861409314	0.999996701290797	-4.30463422676635
GSE133767	10497086	1810013D15Rik	-0.0840875000000012	-0.373000015702346	0.204825015702343	3.16873375	-0.614954837273114	0.546882821450347	0.999996701290797	-4.76934309714373
GSE133767	10433472	1810013L24Rik	-0.043215	-0.383764417276131	0.297334417276131	4.3049125	-0.268122038802247	0.791892845790318	0.999996701290797	-4.83227813815253
GSE133767	10497335	1810022K09Rik	-0.136775000000001	-0.532383746872352	0.258833746872351	3.498055	-0.730497906201842	0.4752217222301	0.999996701290797	-4.73809005160342
GSE133767	10487366	1810024B03Rik	-0.0514199999999994	-0.355963779408506	0.253123779408507	2.40895375	-0.356747120613691	0.725753957739661	0.999996701290797	-4.82076238182956
GSE133767	10583694	1810026J23Rik	0.12221875	-0.0924479972181926	0.336885497218192	1.826619375	1.20296003482348	0.24578874554924	0.999996701290797	-4.56324954872924
GSE133767	10603651	1810030O07Rik	-0.0160437499999999	-0.270996190026382	0.238908690026382	2.001106875	-0.132961176880696	0.895814891634581	0.999996701290797	-4.84361027654753
GSE133767	10382838	1810032O08Rik	0.0673150000000007	-0.336846793175804	0.471476793175805	2.644235	0.351912531043298	0.729310314388003	0.999996701290797	-4.82147304651778
GSE133767	10405820	1810034E14Rik	-0.000496250000000753	-0.166411030135056	0.165418530135055	2.152530625	-0.00631965807127077	0.995032641216677	0.999996701290797	-4.84731018794809
GSE133767	10604019	1810037I17Rik	0.587005	-0.626880987689356	1.80089098768936	5.162515	1.02174386696108	0.321492876343955	0.999996701290797	-4.63861473970151
GSE133767	10431140	1810041L15Rik	-0.170613749999999	-0.452480415762404	0.111252915762406	2.451164375	-1.27893492654927	0.218426714618141	0.999996701290797	-4.52892625999923
GSE133767	10364338	1810043G02Rik	-0.12134875	-0.314781576517269	0.0720840765172689	2.657654375	-1.32551078705887	0.202870415354438	0.999996701290797	-4.50714770935979
GSE133767	10593473	1810046K07Rik	-0.0976149999999993	-0.356099532026171	0.160869532026172	4.34775	-0.797921443027149	0.436128831931931	0.999996701290797	-4.71762217864338
GSE133767	10427814	1810049J17Rik	-0.111672500000001	-0.287984644842447	0.0646396448424454	5.52924375	-1.33826508458676	0.198767594174838	0.999996701290797	-4.50108977445566
GSE133767	10460196	1810055G02Rik	0.0209825000000006	-0.150404994035226	0.192369994035227	2.7783	0.258676061730244	0.799050073135085	0.999996701290797	-4.83331588587912
GSE133767	10537292	1810058I24Rik	-0.114087499999999	-0.358774822782474	0.130599822782475	2.709875	-0.985155375938251	0.338622669358291	0.999996701290797	-4.6526411855259
GSE133767	10491547	1810062G17Rik	-0.108134999999999	-0.343446748624003	0.127176748624004	3.26428125	-0.970958819040119	0.345438599552937	0.999996701290797	-4.65797043592143
GSE133767	10412978	1810062O18Rik	-0.17876125	-0.487046679208542	0.129524179208543	2.593634375	-1.22517611438997	0.237528105904848	0.999996701290797	-4.55337131401482
GSE133767	10376376	1810065E05Rik	-0.133005	-0.383664553293632	0.117654553293632	1.66489625	-1.12114515227231	0.278107651258567	0.999996701290797	-4.59845332422003
GSE133767	10368695	2010001E11Rik	-0.27145875	-0.561148176782099	0.0182306767820984	2.472146875	-1.9799277280357	0.0644550363542123	0.999996701290797	-4.15448432992014
GSE133767	10404939	2010001K21Rik	-0.0951837499999999	-0.299832686924101	0.109465186924101	3.054806875	-0.982723757201682	0.3397833849653	0.999996701290797	-4.65355851452921
GSE133767	10467149	2010002M12Rik	-0.0651700000000002	-0.230863392637206	0.100523392637206	1.26873875	-0.831037588798674	0.417689655711028	0.999996701290797	-4.7069858967371
GSE133767	10464772	2010003K11Rik	0.146605	-0.0632686940410283	0.356478694041028	3.49880625	1.47594071349277	0.158587402075846	0.999996701290797	-4.43326594902396
GSE133767	10585282	2010007H06Rik	-0.0413837499999987	-0.272654181714177	0.189886681714179	3.323218125	-0.378083624782527	0.710136687881869	0.999996701290797	-4.81751314170543
GSE133767	10463695	2010012O05Rik	-0.0491487499999996	-0.22226161485776	0.12396411485776	2.155911875	-0.599875701148468	0.556651017804462	0.999996701290797	-4.77305605420543
GSE133767	10501048	2010016I18Rik	-0.0545787500000006	-0.325106984521256	0.215949484521255	3.166486875	-0.426274274475659	0.675358044847663	0.999996701290797	-4.80950087253832
GSE133767	10601484	2010106E10Rik	-0.0115649999999996	-0.22415417753459	0.201024177534591	1.78013375	-0.114943025050018	0.909862567847794	0.999996701290797	-4.84454663699787
GSE133767	10402752	2010107E04Rik	0.0808074999999988	-0.62670060239148	0.788315602391478	8.36761125	0.241322819289581	0.812246365929183	0.999996701290797	-4.8351265357634
GSE133767	10543895	2010107G12Rik	-0.03768875	-0.248034471408848	0.172656971408848	2.527866875	-0.378578711183802	0.709775850113794	0.999996701290797	-4.81743556676329
GSE133767	10369525	2010107G23Rik	0.109452500000001	-0.125356724134449	0.34426172413445	4.25597	0.984892135253057	0.338748191108971	0.999996701290797	-4.65274058315754
GSE133767	10523293	2010109A12Rik	-0.05629	-0.401835441815506	0.289255441815506	1.8646625	-0.34419473076184	0.735000754106808	0.999996701290797	-4.82258790483697
GSE133767	10429555	2010109I03Rik	0.0273012500000003	-0.232254272018909	0.28685677201891	3.111598125	0.222244179742804	0.826822101133162	0.999996701290797	-4.8369737168091
GSE133767	10405757	2010111I01Rik	0.0529774999999999	-0.188833495489857	0.294788495489857	2.37515375	0.462906791404446	0.649412963966183	0.999996701290797	-4.80279084322289
GSE133767	10603316	2010204K13Rik	0.12965125	-0.100493113567754	0.359795613567754	1.773765625	1.1902947070821	0.250595598227992	0.999996701290797	-4.5688211750009
GSE133767	10354019	2010300C02Rik	-0.0792512500000004	-0.368827334987302	0.210324834987301	2.973510625	-0.578257888330287	0.570815270268778	0.999996701290797	-4.77822892917066
GSE133767	10561706	2200002D01Rik	0.02971375	-0.256061113836778	0.315488613836778	4.800010625	0.219690651016509	0.828778033706642	0.999996701290797	-4.83720952353346
GSE133767	10552000	2200002J24Rik	-0.0824824999999998	-0.376957479804023	0.211992479804023	2.3038075	-0.591822609134334	0.561905591691217	0.999996701290797	-4.77500378520437
GSE133767	10544326	2210010C04Rik	0.0421237499999982	-0.23614681776047	0.320394317760467	2.902630625	0.319843765521453	0.75305802719176	0.999996701290797	-4.82594687865536
GSE133767	10580058	2210011C24Rik	-0.236388749999999	-0.525480430825433	0.0527029308254346	3.563664375	-1.72770403379503	0.102507611324466	0.999996701290797	-4.29912505410929
GSE133767	10409684	2210016F16Rik	0.1649975	-0.146187616024536	0.476182616024535	3.08651625	1.12030605872515	0.278454802639771	0.999996701290797	-4.59880455515979
GSE133767	10524640	2210016L21Rik	-0.0786587499999998	-0.319667511597422	0.162350011597423	3.773053125	-0.689592209789673	0.499932348981207	0.999996701290797	-4.74971497813876
GSE133767	10565738	2210018M11Rik	-0.12451875	-0.302128656614286	0.0530911566142862	2.625750625	-1.48130914376929	0.157166975597625	0.999996701290797	-4.43053534860612
GSE133767	10529544	2210406O10Rik	0.0380487500000002	-0.184966658305738	0.261064158305738	2.594275625	0.360482064057092	0.723010918071574	0.999996701290797	-4.82020688349896
GSE133767	10386197	2210407C18Rik	0.223217500000001	0.0306808965835033	0.415754103416498	1.60455	2.44958814190837	0.0256664851922233	0.999996701290797	-3.86862550838533
GSE133767	10406364	2210408I21Rik	0.0561625000000001	-0.143603178986907	0.255928178986907	1.4656875	0.594023591356345	0.560466872472744	0.999996701290797	-4.7744738922208
GSE133767	10380250	2210409E12Rik	0.14213125	-0.349939967851576	0.634202467851577	3.985210625	0.610294912598339	0.549891584907112	0.999996701290797	-4.77049966960068
GSE133767	10479176	2210418O10Rik	-0.631482500000001	-2.05950450778147	0.796539507781469	5.50035625	-0.934339170695093	0.363458391936609	0.999996701290797	-4.67142009421701
GSE133767	10444886	2300002M23Rik	-0.0553737500000002	-0.318491966281701	0.207744466281701	3.338431875	-0.444663166740311	0.662278732263062	0.999996701290797	-4.80619906239656
GSE133767	10390934	2300003K06Rik	-0.132401249999999	-0.315827648998479	0.0510251489984803	4.384543125	-1.52513533256602	0.145960942956738	0.999996701290797	-4.4080166545095
GSE133767	10429510	2300005B03Rik	0.0156587500000001	-0.261180791329867	0.292498291329867	2.786054375	0.119510787097087	0.9062982499608	0.999996701290797	-4.84432210380811
GSE133767	10594377	2300009A05Rik	-0.0617687499999997	-0.29858081645498	0.175043316454981	4.672044375	-0.551116130443087	0.58886055955778	0.999996701290797	-4.78447135993843
GSE133767	10478381	2310001K24Rik	0.0235012499999998	-0.251090547398569	0.298093047398569	1.915180625	0.180834604155565	0.858676325907811	0.999996701290797	-4.84046409260413
GSE133767	10513945	2310002L09Rik	-0.0476087500000006	-0.272596448329103	0.177378948329102	2.551934375	-0.447101516967792	0.660552726710987	0.999996701290797	-4.80575116370408
GSE133767	10393761	2310003H01Rik	-0.0330425000000001	-0.262577491838229	0.196492491838229	3.89224875	-0.304160024342153	0.764767576607361	0.999996701290797	-4.82798238811526
GSE133767	10522904	2310003L06Rik	0.0703812500000003	-0.150324651356677	0.291087151356678	1.377638125	0.673784734694307	0.509677768565168	0.999996701290797	-4.75404401242094
GSE133767	10356764	2310007B03Rik	-0.180609999999999	-0.445946717490782	0.084726717490783	3.26620875	-1.43821090618899	0.168871826225086	0.999996701290797	-4.45228067874196
GSE133767	10382096	2310007L24Rik	0.0445074999999995	-0.263603715313183	0.352618715313182	3.53869875	0.305213564394534	0.763979119403603	0.999996701290797	-4.82784880213084
GSE133767	10370777	2310011J03Rik	-0.0163087500000003	-0.28231639295806	0.24969889295806	2.754603125	-0.129540240093772	0.898479398794368	0.999996701290797	-4.84379849022387
GSE133767	10550059	2310014L17Rik	0.280321249999999	-0.00389925707905758	0.564541757079056	2.319116875	2.08390899092981	0.0528725951963677	0.999996701290797	-4.09262834536861
GSE133767	10363856	2310015B20Rik	-0.0757462500000003	-0.294095792880673	0.142603292880673	3.004833125	-0.732971329116704	0.47375133623048	0.999996701290797	-4.73736775345784
GSE133767	10552715	2310016G11Rik	-0.18919875	-0.422419948509128	0.0440224485091288	1.859959375	-1.71406930272796	0.105034846798589	0.999996701290797	-4.30668148529219
GSE133767	10551382	2310022A10Rik	-0.0343450000000005	-0.295735165080297	0.227045165080296	2.45624375	-0.277621064381174	0.784714691371242	0.999996701290797	-4.83119755881448
GSE133767	10582664	2310022B05Rik	0.157777500000001	-0.114460230121234	0.430015230121235	4.86588375	1.22454540384746	0.237759636574301	0.999996701290797	-4.5536535860805
GSE133767	10593413	2310030G06Rik	0.10417875	-0.0989607964783372	0.307318296478337	3.100559375	1.0835845420154	0.293963756159472	0.999996701290797	-4.61397478049717
GSE133767	10376482	2310033P09Rik	0.0998537499999994	-0.215145050814128	0.414852550814127	3.391008125	0.669782222494429	0.512162479656965	0.999996701290797	-4.75512558054061
GSE133767	10436748	2310034C09Rik	-0.127474999999999	-0.41107175667435	0.156121756674352	3.74111	-0.949733808260274	0.355806014169369	0.999996701290797	-4.6658184644649
GSE133767	10349016	2310035C23Rik	0.13647375	-0.113124701463027	0.386072201463027	1.774173125	1.15527500123201	0.264259023172561	0.999996701290797	-4.58399622946354
GSE133767	10573515	2310036O22Rik	-0.183807499999999	-0.843844500157603	0.476229500157606	4.69859	-0.588400568496771	0.564146346942234	0.999996701290797	-4.77582400257005
GSE133767	10445627	2310039H08Rik	-0.0157550000000004	-0.290766199040786	0.259256199040785	3.71423125	-0.121044807803041	0.905101680561548	0.999996701290797	-4.84424474025341
GSE133767	10522666	2310040G07Rik	0.34602	-0.158014295562137	0.850054295562136	2.06603	1.45050507047818	0.165462179215267	0.999996701290797	-4.44611899823043
GSE133767	10572301	2310045N01Rik	-0.0659650000000007	-0.39843879634402	0.266508796344018	3.35067375	-0.419212555734872	0.680409659311553	0.999996701290797	-4.81073307352506
GSE133767	10377416	2310047M10Rik	-0.112975000000001	-0.470790355336927	0.244840355336925	3.091415	-0.66711624030207	0.513821310593532	0.999996701290797	-4.75584271415865
GSE133767	10368477	2310057J18Rik	-0.0824649999999996	-0.32012013550457	0.155190135504571	2.0469475	-0.733163097111595	0.47363744930517	0.999996701290797	-4.73731166091127
GSE133767	10568521	2310057M21Rik	0.00312749999999928	-0.267643237583022	0.27389823758302	2.6687375	0.0244047142886721	0.98081936205052	0.999996701290797	-4.84719353834933
GSE133767	10440669	2310057N15Rik	-0.16489625	-0.352470340242578	0.0226778402425791	1.646593125	-1.85744544829596	0.0809925771585268	0.999996701290797	-4.22579716285454
GSE133767	10450614	2310061I04Rik	-0.0354212499999997	-0.266829044131232	0.195986544131233	4.327966875	-0.323417888904016	0.750398110007338	0.999996701290797	-4.82546897279203
GSE133767	10440664	2310061N02Rik	0.0363312500000008	-0.194717922415253	0.267380422415255	2.999643125	0.332241638797937	0.743845265446499	0.999996701290797	-4.82426684998785
GSE133767	10382573	2310067B10Rik	-0.11922375	-0.31144011560056	0.0729926156005606	3.688938125	-1.31054082291098	0.207771557479513	0.999996701290797	-4.51420686689629
GSE133767	10440655	2310079G19Rik	-0.113685000000001	-0.310792735424904	0.0834227354249024	2.6898225	-1.21864618997988	0.239933639264865	0.999996701290797	-4.55628859715613
GSE133767	10502417	2410002F23Rik	0.0173112499999992	-0.191008398300823	0.225630898300822	3.689894375	0.17558052038559	0.862737287456944	0.999996701290797	-4.8408560342343
GSE133767	10496742	2410004B18Rik	0.0273475000000003	-0.533870534250207	0.588565534250208	3.22727125	0.102958960699971	0.919223201942053	0.999996701290797	-4.84509423509393
GSE133767	10399549	2410004P03Rik	-0.14964875	-0.371231390656776	0.0719338906567767	3.308401875	-1.42697215012364	0.172038910810316	0.999996701290797	-4.45788399762346
GSE133767	10588077	2410012M07Rik	-0.00815625000000031	-0.290017562524735	0.273705062524734	2.247775625	-0.0611410927365907	0.951973437834403	0.999996701290797	-4.8465339116511
GSE133767	10452110	2410015M20Rik	0.18120375	-0.364754911986185	0.727162411986185	3.438580625	0.701270480006575	0.492802472759423	0.999996701290797	-4.74645807525887
GSE133767	10397143	2410016O06Rik	0.17043375	-0.335878349669486	0.676745849669486	4.138851875	0.711238784169501	0.486763915692985	0.999996701290797	-4.74363880349261
GSE133767	10444997	2410017I17Rik	0.11774	-0.0881853622390218	0.323665362239022	1.52141875	1.20807064116995	0.24386922577697	0.999996701290797	-4.5609889562006
GSE133767	10394931	2410018L13Rik	0.0662862500000001	-0.380388612601274	0.512961112601274	4.091326875	0.313552360950277	0.757747953985574	0.999996701290797	-4.8267754667716
GSE133767	10500798	2410024N13Rik	-0.0130349999999999	-0.609674667334919	0.58360466733492	1.3936525	-0.0461611956149708	0.96372991200295	0.999996701290797	-4.84687126802455
GSE133767	10462088	2410080I02Rik	-0.0895437499999998	-0.324092117867402	0.145004617867402	4.481765625	-0.806642314476905	0.431223887131483	0.999996701290797	-4.71485801734317
GSE133767	10570002	2410089E03Rik	-0.0297662500000011	-0.26179828574171	0.202265785741708	2.759144375	-0.271053058357163	0.78967586412169	0.999996701290797	-4.83194867045492
GSE133767	10436955	2410124H12Rik	0.22179875	0.0424621396699088	0.401135360330092	2.254399375	2.61317367623417	0.0183765489716443	0.999996701290797	-3.76668916094162
GSE133767	10595205	2410127L17Rik	0.281497499999999	-0.180524059155658	0.743519059155656	3.883085	1.28733162411093	0.215554948381379	0.999996701290797	-4.52504046611101
GSE133767	10524973	2410131K14Rik	0.0803687500000012	-0.117454238433083	0.278191738433086	3.915741875	0.85839779355029	0.402839415027933	0.999996701290797	-4.69791437630829
GSE133767	10450835	2410137M14Rik	0.0121487500000006	-0.214140693498941	0.238438193498942	2.659921875	0.113434572325581	0.911040083541258	0.999996701290797	-4.84461886980808
GSE133767	10410237	2410141K09Rik	0.388633749999999	-0.46304164742716	1.24030914742716	3.448106875	0.964149873524128	0.348741325225433	0.999996701290797	-4.66050375333831
GSE133767	10434248	2510002D24Rik	-0.219905000000001	-0.444622839378372	0.00481283937837024	3.27906375	-2.06764364428979	0.0545496321607984	0.999996701290797	-4.10237429595983
GSE133767	10369620	2510003E04Rik	0.1005175	-0.14880208925105	0.349837089251049	2.5228275	0.851850559769847	0.406361274642339	0.999996701290797	-4.70010834460653
GSE133767	10438572	2510009E07Rik	-0.15508875	-0.384142435710545	0.0739649357105439	3.221811875	-1.43060964430115	0.171008593562644	0.999996701290797	-4.45607354173141
GSE133767	10510256	2510039O18Rik	-0.0549874999999993	-0.276030950842937	0.166055950842938	4.59053	-0.525611017766598	0.606075957586449	0.999996701290797	-4.79007932984265
GSE133767	10567999	2510046G10Rik	0.19032625	-0.0883721558576024	0.469024655857602	2.857231875	1.4429203001791	0.167558986464733	0.999996701290797	-4.449924340688
GSE133767	10481380	2600006K01Rik	-0.0872487499999992	-0.37237281664581	0.197875316645812	3.684304375	-0.646552022001103	0.526718803284244	0.999996701290797	-4.76128607318906
GSE133767	10543226	2610001J05Rik	0.0557587500000016	-0.504033411307669	0.615550911307672	3.776518125	0.210457474063698	0.835859980359127	0.999996701290797	-4.83803962777032
GSE133767	10511007	2610002J02Rik	-0.0930000000000009	-0.297561349661466	0.111561349661464	3.48095125	-0.960588770621143	0.350477360547834	0.999996701290797	-4.66182279932039
GSE133767	10606376	2610002M06Rik	0.19729375	-0.0416186290517646	0.436206129051765	1.490969375	1.74482876327922	0.0994084246620809	0.999996701290797	-4.28959206971962
GSE133767	10457223	2610005L07Rik	-0.129041249999998	-1.04242345415905	0.784340954159049	4.322156875	-0.298506747744275	0.76900295261448	0.999996701290797	-4.82869145605247
GSE133767	10370544	2610008E11Rik	-0.0309562499999996	-0.287669290134409	0.225756790134409	1.706366875	-0.254787755327557	0.802001653717674	0.999996701290797	-4.83373238693229
GSE133767	10435802	2610015P09Rik	-0.0135262500000004	-0.209782413124153	0.182729913124153	1.709323125	-0.145623761004869	0.885963644911374	0.999996701290797	-4.84287107623924
GSE133767	10556790	2610020H08Rik	0.0401287500000005	-0.213308555715498	0.293566055715499	1.858139375	0.334551688467694	0.742133053647266	0.999996701290797	-4.82394690322547
GSE133767	10552314	2610021A01Rik	0.232826250000001	-0.0858400717430921	0.551492571743093	1.815021875	1.54373913165597	0.141409891364148	0.999996701290797	-4.39833823833971
GSE133767	10364155	2610028H24Rik	-0.12036125	-0.300107414828967	0.0593849148289664	3.676405625	-1.4148330423821	0.175514036781233	0.999996701290797	-4.46390429555028
GSE133767	10564849	2610034B18Rik	-0.192798749999999	-0.376102647393713	-0.00949485260628566	2.708034375	-2.22234076191483	0.0403966050234146	0.999996701290797	-4.00879011121755
GSE133767	10452386	2610034M16Rik	0.0693225000000002	-0.150587355887676	0.289232355887677	2.5439025	0.666051268487861	0.51448481124936	0.999996701290797	-4.75612845281298
GSE133767	10417769	2610042L04Rik	-0.0381499999999999	-0.30542239167455	0.22912239167455	4.0203575	-0.301591140505014	0.766691214543341	0.999996701290797	-4.82830621329928
GSE133767	10584595	2610203C20Rik	-0.0372875000000001	-0.228737274768039	0.154162274768039	2.4467575	-0.411515827885249	0.685933414314063	0.999996701290797	-4.81205341217428
GSE133767	10554712	2610206C17Rik	0.0216875000000001	-0.173359425484202	0.216734425484202	1.364345	0.234935432122786	0.817118598797339	0.999996701290797	-4.8357617123532
GSE133767	10503251	2610301B20Rik	-0.12972125	-0.339317208551217	0.0798747085512183	1.874865625	-1.30769468285362	0.208713905068724	0.999996701290797	-4.51554267300744
GSE133767	10595892	2610303G11Rik	-0.148333749999999	-0.376664484199885	0.0799969841998857	1.596993125	-1.37263080207696	0.188042055822552	0.999996701290797	-4.48457096480647
GSE133767	10510201	2610305D13Rik	0.1142925	-0.192158365655403	0.420743365655404	2.9100225	0.788015966745311	0.441742456394098	0.999996701290797	-4.72072966073136
GSE133767	10455967	2610318N02Rik	-0.0956174999999999	-0.375007892461995	0.183772892461996	3.86464875	-0.723109478087445	0.479630202087992	0.999996701290797	-4.74023454950856
GSE133767	10379075	2610507B11Rik	0.219207500000001	-0.00141428578362821	0.439829285783631	2.87720875	2.09935145656038	0.0513240328457788	0.999996701290797	-4.08335322659871
GSE133767	10532896	2610524H06Rik	-0.183175	-0.928657749105945	0.562307749105945	2.90141625	-0.519166593479941	0.610464467350919	0.999996701290797	-4.79145648993933
GSE133767	10419034	2610528A11Rik	0.0644112500000009	-0.0876041154349951	0.216426615434997	3.321589375	0.895266588396409	0.383381839696067	0.999996701290797	-4.68529045619843
GSE133767	10507551	2610528J11Rik	-0.0764037499999999	-0.32589047988926	0.17308297988926	3.394824375	-0.647061204021385	0.526397286113035	0.999996701290797	-4.76115318541827
GSE133767	10571911	2700029M09Rik	-0.0667649999999997	-0.425464238633547	0.291934238633548	3.85903875	-0.393275177503006	0.699097209174497	0.999996701290797	-4.81508786165579
GSE133767	10459329	2700046A07Rik	-0.0684025000000008	-0.326518637923158	0.189713637923157	2.015475	-0.559931568931629	0.582968100750071	0.999996701290797	-4.78247479684758
GSE133767	10462501	2700046G09Rik	-0.145277500000001	-0.374068554788691	0.0835135547886892	3.68917375	-1.34164449945094	0.197691664574119	0.999996701290797	-4.49947798605624
GSE133767	10396237	2700049A03Rik	-0.10283125	-0.387201777514224	0.181539277514224	2.645069375	-0.764044526231824	0.455513237851863	0.999996701290797	-4.72810736930268
GSE133767	10417778	2700060E02Rik	-0.0665037499999999	-0.50046762273307	0.36746012273307	4.959849375	-0.323795415867437	0.750117337132669	0.999996701290797	-4.82541818869429
GSE133767	10454326	2700062C07Rik	-0.0636725	-0.582365427567959	0.455020427567959	1.92855625	-0.259369982638731	0.79852365177828	0.999996701290797	-4.83324090075952
GSE133767	10461071	2700081O15Rik	0.0257387499999999	-0.188856462852659	0.240333962852659	3.616806875	0.253422726638464	0.803038570274436	0.999996701290797	-4.83387712646219
GSE133767	10542264	2700089E24Rik	0.11204125	-0.122710163027658	0.346792663027658	1.730686875	1.00843490059269	0.327651064150859	0.999996701290797	-4.64376505559939
GSE133767	10484425	2700094K13Rik	0.390702499999997	-0.0321468134445063	0.8135518134445	6.072765	1.95226468207495	0.0678997783673308	0.999996701290797	-4.17074821968566
GSE133767	10400383	2700097O09Rik	0.25560625	-0.0928714674976301	0.604083967497631	1.611811875	1.54979620327947	0.139954063306776	0.999996701290797	-4.39517211666933
GSE133767	10474093	2810002D19Rik	0.0838162499999995	-0.12280120470486	0.290433704704859	2.761464375	0.857115514617675	0.403527596067128	0.999996701290797	-4.69834520913913
GSE133767	10582699	2810004N23Rik	0.381838750000001	-0.195342815600039	0.959020315600041	4.123483125	1.39780208852388	0.180485690154587	0.999996701290797	-4.47229409269212
GSE133767	10525726	2810006K23Rik	-0.09207375	-0.302349331689905	0.118201831689905	2.297283125	-0.925177635134154	0.368065420853964	0.999996701290797	-4.67471722149525
GSE133767	10560131	2810007J24Rik	-0.0653487499999998	-0.327948333245875	0.197250833245876	1.902968125	-0.525800977917064	0.605946833065825	0.999996701290797	-4.79003849140499
GSE133767	10382888	2810008D09Rik	0.0775075000000003	-0.130784857397427	0.285799857397427	2.9047725	0.786228044674326	0.442760500796621	0.999996701290797	-4.72128690120631
GSE133767	10376427	2810021J22Rik	0.0200450000000005	-0.288280586568041	0.328370586568042	2.69634625	0.137364538518526	0.892387084183267	0.999996701290797	-4.84336081556462
GSE133767	10350848	2810025M15Rik	-0.16383875	-0.675844595661175	0.348167095661175	5.366336875	-0.676113867583478	0.50823504789519	0.999996701290797	-4.75341191589662
GSE133767	10394389	2810032G03Rik	-0.10247875	-0.367218780357969	0.16226128035797	2.091896875	-0.817885186490758	0.424952243254593	0.999996701290797	-4.71125555858343
GSE133767	10424705	2810039B14Rik	0.0520262499999999	-0.145831328007819	0.249883828007819	3.770571875	0.55558175107457	0.585871874147196	0.999996701290797	-4.7834636929094
GSE133767	10559878	2810047C21Rik1	-0.0178724999999997	-0.277188451870582	0.241443451870583	2.91379	-0.145624420354343	0.885963132436227	0.999996701290797	-4.84287103600577
GSE133767	10493292	2810403A07Rik	0.179150000000001	-0.0569560799966461	0.415256079996648	2.7315225	1.6032002760667	0.127655662461673	0.999996701290797	-4.36694694821569
GSE133767	10436742	2810407A14Rik	-0.0407774999999999	-0.223275223735504	0.141720223735504	1.51170125	-0.472107915188186	0.642966882254884	0.999996701290797	-4.80102205499696
GSE133767	10387723	2810408A11Rik	-0.1207425	-0.410009654897747	0.168524654897747	2.86788375	-0.881940277533228	0.390341258837477	0.999996701290797	-4.68990589585564
GSE133767	10489719	2810408M09Rik	0.2728775	-0.0321314908967646	0.577886490896764	1.97491375	1.8903108338616	0.0762200074608322	0.999996701290797	-4.20684496781057
GSE133767	10393749	2810410L24Rik	0.0417549999999998	-0.187270043657866	0.270780043657866	3.233045	0.385215408707905	0.704945665504442	0.999996701290797	-4.8163861358325
GSE133767	10350838	2810417H13Rik	0.0908524999999996	-0.16801933799215	0.349724337992149	2.6296025	0.741532538055103	0.468683056353076	0.999996701290797	-4.73485074023149
GSE133767	10579296	2810428I15Rik	0.00281250000000055	-0.265065145636278	0.270690145636279	3.38595125	0.022183710810623	0.98256461855885	0.999996701290797	-4.84721526026852
GSE133767	10348000	2810459M11Rik	-0.0132287499999997	-0.240704591721225	0.214247091721226	2.850270625	-0.122874472292946	0.903674810508837	0.999996701290797	-4.84415118023222
GSE133767	10542885	2810474O19Rik	0.29605625	-0.0753303392358992	0.6674428392359	2.687299375	1.68432600435482	0.110735654603991	0.999996701290797	-4.32305884576798
GSE133767	10520271	2900005J15Rik	0.00174624999999962	-0.239293222986321	0.24278572298632	2.306958125	0.0153072222279976	0.98796867597511	0.999996701290797	-4.84726938197025
GSE133767	10433709	2900011O08Rik	0.0376962499999993	-0.231797093868046	0.307189593868045	3.042094375	0.295548148579068	0.771222518897103	0.999996701290797	-4.82905732909789
GSE133767	10532669	2900026A02Rik	-0.107092499999998	-0.304181012199453	0.0899960121994582	4.0204925	-1.14808986511814	0.267130569694109	0.999996701290797	-4.58706732865992
GSE133767	10382932	2900041M22Rik	0.0425525000000002	-0.19416399075065	0.27926899075065	2.68269625	0.379817266364734	0.708873455523886	0.999996701290797	-4.81724106547016
GSE133767	10393751	2900052L18Rik	0.126462499999999	-0.0723359155182046	0.325260915518203	3.43708125	1.34408576521926	0.196917318334633	0.999996701290797	-4.49831191469003
GSE133767	10455292	2900055J20Rik	0.0461812499999996	-0.226391608264863	0.318754108264862	2.232516875	0.357982018788588	0.724846588958694	0.999996701290797	-4.82057933986428
GSE133767	10554547	2900076A07Rik	-0.131223750000001	-0.347776537219194	0.0853290372191923	1.932875625	-1.28034439299899	0.217942575165271	0.999996701290797	-4.52827525014242
GSE133767	10550015	2900092C05Rik	0.0666475	-0.111106570358572	0.244401570358572	1.371115	0.792213878255514	0.439357920374289	0.999996701290797	-4.71941690370211
GSE133767	10386947	3000002C10Rik	-0.15345625	-0.394937191537697	0.0880246915376978	7.117878125	-1.34270268670426	0.197355719498993	0.999996701290797	-4.498972720189
GSE133767	10542875	3010003L21Rik	0.125755	-0.0930711157867235	0.344581115786723	2.29628	1.21423919404998	0.241567682531055	0.999996701290797	-4.55825097661806
GSE133767	10375704	3010026O09Rik	-0.123515000000001	-0.330766625753956	0.083736625753955	2.43878375	-1.25921501605897	0.225289071401503	0.999996701290797	-4.53798093450429
GSE133767	10516227	3100002H09Rik	0.1127825	-0.135854916666663	0.361419916666663	2.9909775	0.958414486741953	0.35154026017155	0.999996701290797	-4.66262616909562
GSE133767	10433660	3110001I22Rik	-0.14182	-0.302328919397201	0.0186889193972004	2.51216625	-1.86688019028173	0.0795960907340242	0.999996701290797	-4.22037107632945
GSE133767	10453918	3110002H16Rik	0.15233375	-0.191519136987239	0.496186636987239	3.094880625	0.936055491525699	0.362599710236814	0.999996701290797	-4.67079937642974
GSE133767	10601588	3110007F17Rik	-0.0566499999999999	-0.201280332797662	0.0879803327976625	1.59704625	-0.827596539293879	0.419582009802071	0.999996701290797	-4.70810870881585
GSE133767	10349333	3110009E18Rik	0.0613662499999998	-0.290163904706323	0.412896404706323	4.084609375	0.368846050044404	0.71688231893387	0.999996701290797	-4.81894245302393
GSE133767	10398193	3110018I06Rik	-0.0607312500000003	-0.366304779160988	0.244842279160987	1.923146875	-0.419927800607622	0.679897288946553	0.999996701290797	-4.81060917539139
GSE133767	10541186	3110021A11Rik	-0.116296250000001	-0.343295153245831	0.110702653245828	4.392333125	-1.08248051935499	0.294439647696311	0.999996701290797	-4.61442473591072
GSE133767	10344743	3110035E14Rik	0.0789100000000005	-0.281964362634272	0.439784362634273	2.42100625	0.462012952129744	0.650040707312575	0.999996701290797	-4.80296089247595
GSE133767	10395596	3110039M20Rik	-0.0319574999999999	-0.273866033656331	0.209951033656331	2.99011375	-0.279125649013382	0.783579531565855	0.999996701290797	-4.83102300136752
GSE133767	10565170	3110040N11Rik	0.0132287500000006	-0.226621380525516	0.253078880525517	2.596986875	0.116535162810418	0.90861996123903	0.999996701290797	-4.84446936446522
GSE133767	10512030	3110043O21Rik	-0.19353	-0.46819800633624	0.0811380063362389	2.26046875	-1.48873829066726	0.155218684191155	0.999996701290797	-4.42674645464957
GSE133767	10442236	3110052M02Rik	-0.0575312500000003	-0.294868578334513	0.179806078334512	2.442224375	-0.512172077705985	0.615244935460472	0.999996701290797	-4.79293295322885
GSE133767	10394843	3110053B16Rik	0.12451	-0.177381441571666	0.426401441571666	4.33944125	0.871428118271461	0.395889838829778	0.999996701290797	-4.69350484728173
GSE133767	10491820	3110057O12Rik	0.00907250000000004	-0.306103078964986	0.324248078964986	1.78390125	0.0608208597368762	0.952224652667589	0.999996701290797	-4.84654210815815
GSE133767	10543872	3110062M04Rik	-0.0224900000000008	-0.257785717454998	0.212805717454997	2.12955375	-0.201954516387203	0.84239473578773	0.999996701290797	-4.83877282450937
GSE133767	10412417	3110070M22Rik	0.0974049999999997	-0.0774831764378688	0.272293176437868	2.69629875	1.17678991690415	0.255799627452685	0.999996701290797	-4.574713561705
GSE133767	10348240	3110079O15Rik	0.0825537500000006	-0.216844944749527	0.381952444749529	4.209351875	0.582592702563324	0.567960068513215	0.999996701290797	-4.77720589123293
GSE133767	10535084	3110082I17Rik	-0.0749712499999995	-0.415596207075471	0.265653707075472	3.144735625	-0.465046547251693	0.647911318086218	0.999996701290797	-4.80238248291413
GSE133767	10528925	3110082J24Rik	-0.0207774999999999	-0.225789171440997	0.184234171440998	3.90555875	-0.214137556081513	0.833035538372496	0.999996701290797	-4.8377130053289
GSE133767	10455146	3222401L13Rik	0.107345	-0.170840306066937	0.385530306066938	1.999995	0.815315635660845	0.426380473493394	0.999996701290797	-4.71208275241598
GSE133767	10397703	3300002A11Rik	-0.0272162499999995	-0.272468285739797	0.218035785739798	2.410281875	-0.234473519245583	0.817471243243743	0.999996701290797	-4.83580699251933
GSE133767	10488451	3300002I08Rik	0.0649687499999998	-0.217351993626964	0.347289493626964	3.309606875	0.486227881797053	0.633131755142815	0.999996701290797	-4.79824291132267
GSE133767	10418846	3425401B19Rik	0.0512662500000003	-0.185887205662644	0.288419705662645	3.702940625	0.456751761554222	0.653741127972161	0.999996701290797	-4.80395541932247
GSE133767	10419416	3632451O06Rik	-0.0803299999999996	-0.296125917398945	0.135465917398946	2.28334125	-0.786525269371163	0.442591159326752	0.999996701290797	-4.72119434297931
GSE133767	10599680	3830403N18Rik	-0.13073625	-0.326337211400183	0.0648647114001829	1.136659375	-1.41222266029931	0.176268745371562	0.999996701290797	-4.46519452978657
GSE133767	10412701	3830406C13Rik	0.255728749999999	-0.0366979660729116	0.54815546607291	2.340271875	1.847739086672	0.0824518747581412	0.999996701290797	-4.23136695789928
GSE133767	10407049	3830408C21Rik	0.19855375	-0.0659987413283939	0.463106241328395	1.950041875	1.58578525504157	0.131561545080802	0.999996701290797	-4.37621141551557
GSE133767	10599866	3830417A13Rik	-0.0665700000000005	-0.353205463622041	0.22006546362204	1.65863	-0.490712106000189	0.630022953173544	0.999996701290797	-4.79734394132101
GSE133767	10576967	3930402G23Rik	-0.110846250000001	-0.326173225370241	0.10448072537024	2.534021875	-1.08767889690973	0.292203792899229	0.999996701290797	-4.61230293643995
GSE133767	10466903	4430402I18Rik	0.21125	0.0332291450551582	0.389270854944841	1.7245125	2.50728655875721	0.0228282281762346	0.999996701290797	-3.83272654936817
GSE133767	10474057	4631405J19Rik	0.0378124999999996	-0.203494893861434	0.279119893861433	1.6792275	0.331087588015211	0.744701168428383	0.999996701290797	-4.82442587560248
GSE133767	10361265	4631405K08Rik	-0.0566550000000006	-0.284489275901761	0.171179275901759	2.35840375	-0.525408773139483	0.606213447197911	0.999996701290797	-4.79012279387967
GSE133767	10499652	4632404H12Rik	-0.0368062499999997	-0.263243027120885	0.189630527120886	2.127129375	-0.343441477628722	0.735556996240897	0.999996701290797	-4.82269542053881
GSE133767	10490986	4632415L05Rik	-0.118092499999999	-0.350935498037989	0.11475049803799	2.65934625	-1.07161126752259	0.299154977760374	0.999996701290797	-4.61883528415405
GSE133767	10565567	4632427E13Rik	0.0214049999999992	-0.299515494776081	0.342325494776079	2.38643	0.14092755469533	0.889615048711416	0.999996701290797	-4.84315303541102
GSE133767	10363445	4632428N05Rik	-0.0273612499999998	-0.309861682719963	0.255139182719964	2.861854375	-0.204642086020734	0.840327958871427	0.999996701290797	-4.83854432094167
GSE133767	10534638	4731417B20Rik	-0.1111025	-0.306114731485647	0.0839097314856463	2.15129625	-1.20376057890115	0.245487303116648	0.999996701290797	-4.56289590973142
GSE133767	10493496	4731419I09Rik	0.0750699999999997	-0.235920048095328	0.386060048095328	2.6096175	0.510032747526792	0.616710664412058	0.999996701290797	-4.79338074189909
GSE133767	10352971	4732440D04Rik	-0.113657499999999	-0.34600191669159	0.118686916691593	5.16027625	-1.03357975874108	0.316086001530124	0.999996701290797	-4.63398860358414
GSE133767	10432734	4732456N10Rik	-0.3113675	-0.515671536637166	-0.107063463362835	3.5950425	-3.22013789273956	0.005122379393404	0.999996701290797	-3.39131212604991
GSE133767	10401418	4732463B04Rik	-0.1737575	-0.395124245678876	0.0476092456788765	2.182445	-1.65847647711209	0.115904802620111	0.999996701290797	-4.3371701020904
GSE133767	10551155	4732471J01Rik	-0.230541249999999	-0.435464851626267	-0.0256176483737315	4.627220625	-2.37703075394183	0.0297089429022415	0.999996701290797	-3.91362911916781
GSE133767	10455550	4833403I15Rik	-0.1434375	-0.377919531695038	0.0910445316950385	1.76365625	-1.29250215551193	0.213801389356075	0.999996701290797	-4.52263873479726
GSE133767	10443814	4833413E03Rik	-0.115472500000001	-0.400852052026556	0.169907052026554	3.4340975	-0.854936490020199	0.404698809908975	0.999996701290797	-4.69907606315422
GSE133767	10407370	4833420G17Rik	0.0483862500000001	-0.279257320129849	0.376029820129849	2.717810625	0.312031509982875	0.758883143418428	0.999996701290797	-4.82697334154446
GSE133767	10410973	4833422C13Rik	-0.0505512500000003	-0.286631852682262	0.185529352682262	1.470628125	-0.45242826696583	0.656789007402129	0.999996701290797	-4.8047645041252
GSE133767	10484520	4833423E24Rik	-0.11708625	-0.397889366977025	0.163716866977024	1.804518125	-0.881012580076015	0.390828835779553	0.999996701290797	-4.69022499118859
GSE133767	10593460	4833427G06Rik	0.0141575000000005	-0.235314866866084	0.263629866866085	2.02109875	0.119906371276495	0.905989663376839	0.999996701290797	-4.84430224790514
GSE133767	10409330	4833439L19Rik	-0.0440524999999994	-0.294567522229064	0.206462522229065	3.2496125	-0.371547996249161	0.714906726764835	0.999996701290797	-4.81852794748812
GSE133767	10449977	4921501E09Rik	0.0370387499999998	-0.249020177813204	0.323097677813203	2.106415625	0.27357660276716	0.78776857864389	0.999996701290797	-4.83166217675255
GSE133767	10480360	4921504E06Rik	0.0217625000000001	-0.192773384188482	0.236298384188482	1.73030125	0.214331980417842	0.832886383871914	0.999996701290797	-4.83769559327886
GSE133767	10474088	4921507L20Rik	-0.11481375	-0.339874993826245	0.110247493826245	2.051031875	-1.07788226047518	0.29642780183851	0.999996701290797	-4.61629491419288
GSE133767	10544689	4921507P07Rik	0.0150987499999995	-0.2104045989103	0.240602098910299	2.968160625	0.141470580519544	0.889192701736246	0.999996701290797	-4.84312090296189
GSE133767	10476342	4921508D12Rik	0.0416675000000002	-0.22315166038688	0.30648666038688	1.9566575	0.332449877348158	0.743690861870254	0.999996701290797	-4.82423809749334
GSE133767	10400002	4921508M14Rik	-0.0809762499999995	-0.303198716489554	0.141246216489555	2.846549375	-0.769923958884611	0.452111467565532	0.999996701290797	-4.72631659256755
GSE133767	10488553	4921509C19Rik	-0.277346250000001	-0.617738629403728	0.0630461294037265	1.700184375	-1.72155382943315	0.103640962400145	0.999996701290797	-4.30253726648889
GSE133767	10601607	4921511C20Rik	0.00282749999999954	-0.331168960708819	0.336823960708818	1.57958625	0.0178870568027474	0.985941164402816	0.999996701290797	-4.84725140414468
GSE133767	10519490	4921511H03Rik	0.1891925	0.0131715910982498	0.36521340890175	1.5263275	2.27100345068977	0.0367000826843384	0.999996701290797	-3.97899451650271
GSE133767	10607409	4921511M17Rik	-0.22041375	-0.475553402605297	0.0347259026052982	1.584256875	-1.82531936323553	0.0859117556540718	0.999996701290797	-4.2441825691453
GSE133767	10447079	4921513D11Rik	-0.0416450000000004	-0.293718297151433	0.210428297151433	1.78188375	-0.349071314663737	0.731403309713085	0.999996701290797	-4.8218862768014
GSE133767	10366649	4921513I03Rik	-0.212698749999999	-0.400373678892579	-0.0250238211074197	2.199294375	-2.3946211549332	0.0286773249296267	0.999996701290797	-3.90273584431301
GSE133767	10509927	4921514A10Rik	-0.0998225000000001	-0.332320993502008	0.132675993502008	3.31888125	-0.907165314118749	0.377238480553624	0.999996701290797	-4.68111965882033
GSE133767	10409779	4921517D22Rik	-0.247093750000001	-0.452574022578738	-0.0416134774212629	2.011571875	-2.54079581011377	0.0213190669076622	0.999996701290797	-3.81184479145562
GSE133767	10570005	4921522P10Rik	0.15443125	-0.110392815417349	0.419255315417348	2.199268125	1.23212813818022	0.234987563985322	0.999996701290797	-4.5502529268506
GSE133767	10580365	4921524J17Rik	-0.0771787499999999	-0.374026448470352	0.219668948470352	4.952465625	-0.549341224915561	0.590050573854365	0.999996701290797	-4.78486973887261
GSE133767	10453694	4921524L21Rik	-0.2398575	-0.515849134906274	0.0361341349062749	1.75439625	-1.83626569532207	0.0842067911287869	0.999996701290797	-4.23793412102821
GSE133767	10589872	4921528I07Rik	-0.0198737500000004	-0.244161864402863	0.204414364402862	2.403964375	-0.187219766729791	0.853746638835289	0.999996701290797	-4.8399723201513
GSE133767	10416727	4921530L21Rik	-0.0636724999999994	-0.361985572376508	0.234640572376509	1.7837925	-0.450980490215779	0.657811027216585	0.999996701290797	-4.80503378367603
GSE133767	10383785	4921536K21Rik	0.0112712499999996	-0.251544454336426	0.274086954336426	2.259383125	0.0906147522482161	0.928877925851748	0.999996701290797	-4.84559543455133
GSE133767	10514751	4921539E11Rik	-0.0241550000000004	-0.242722554138386	0.194412554138386	1.577475	-0.233506775514157	0.818209428110628	0.999996701290797	-4.83590147459816
GSE133767	10548340	4922502D21Rik	-0.066316250000001	-0.325240747408282	0.19260824740828	1.754530625	-0.541159087033816	0.595552009699754	0.999996701290797	-4.78669054693759
GSE133767	10482052	4930402F06Rik	0.24174875	-0.0876195577515743	0.571117057751575	1.644438125	1.55081704603391	0.139709945354301	0.999996701290797	-4.39463778800924
GSE133767	10487748	4930402H24Rik	-0.10076875	-0.310224668439963	0.108687168439963	2.489376875	-1.01650933709989	0.323905035903284	0.999996701290797	-4.64064694053271
GSE133767	10598571	4930402K13Rik	0.0298187499999996	-0.176841659124548	0.236479159124547	2.910486875	0.304866908159588	0.764238523470641	0.999996701290797	-4.82789280727124
GSE133767	10376127	4930404A10Rik	-0.147668749999999	-0.416961959636901	0.121624459636902	2.581263125	-1.15862083322293	0.262929812778236	0.999996701290797	-4.58256117302321
GSE133767	10371154	4930404N11Rik	-0.0165000000000015	-0.237431587867405	0.204431587867402	4.97581	-0.157799007590007	0.876509633807785	0.999996701290797	-4.84209722501295
GSE133767	10425651	4930407I10Rik	-0.0110462499999997	-0.287032883808562	0.264940383808563	2.901363125	-0.0845677850243332	0.933611688282793	0.999996701290797	-4.84581766387641
GSE133767	10398082	4930408O17Rik	-0.0930100000000005	-0.393124689282534	0.207104689282533	4.70664125	-0.654817879186494	0.521512989312997	0.999996701290797	-4.75911692222406
GSE133767	10606589	4930412D23Rik	0.0543874999999998	-0.223658506478954	0.332433506478953	2.79623875	0.413295400195698	0.684654614053029	0.999996701290797	-4.8117502379246
GSE133767	10386470	4930412M03Rik	-0.142964999999999	-0.416233133814901	0.130303133814903	2.722445	-1.10539851017435	0.284676117669569	0.999996701290797	-4.60501060787609
GSE133767	10469129	4930412O13Rik	0.223006249999999	-0.037244437315999	0.483256937315997	2.836514375	1.81051983445278	0.0882652363059421	0.999996701290797	-4.25260359220516
GSE133767	10374327	4930415F15Rik	-0.0166237499999999	-0.215788881107366	0.182541381107366	2.278526875	-0.176357457780365	0.862136528089741	0.999996701290797	-4.84079880027744
GSE133767	10605648	4930415L06Rik	-0.0157237500000005	-0.245317094649012	0.213869594649011	1.552264375	-0.14470214622241	0.886680014903214	0.999996701290797	-4.84292713576102
GSE133767	10426606	4930415O20Rik	-0.11490625	-0.323355473087262	0.0935429730872621	1.398818125	-1.16471993290423	0.2605197783051	0.999996701290797	-4.57993712679196
GSE133767	10381502	4930417O22Rik	-0.150454999999999	-0.379449212115254	0.0785392121152561	3.58663875	-1.38822626430454	0.18333083830265	0.999996701290797	-4.47698197545794
GSE133767	10454229	4930426D05Rik	-0.0358349999999996	-0.256317205707003	0.184647205707004	4.6081725	-0.343409259554234	0.735580791158893	0.999996701290797	-4.82270001405624
GSE133767	10469538	4930426L09Rik	-0.0235087499999995	-0.267164720815464	0.220147220815465	2.891874375	-0.203859341272412	0.840929776689596	0.999996701290797	-4.83861118106135
GSE133767	10399011	4930427A07Rik	-0.122857499999999	-0.418558218156704	0.172843218156705	2.7761775	-0.877864388351656	0.39248646443104	0.999996701290797	-4.69130571346278
GSE133767	10600541	4930428D18Rik	-0.09163375	-0.292603336929318	0.109335836929318	1.516016875	-0.963392491757801	0.349110048133977	0.999996701290797	-4.6607846294874
GSE133767	10485747	4930430A15Rik	0.000919999999999366	-0.147818002121038	0.149658002121037	1.47394875	0.0130690500434548	0.989727741745444	0.999996701290797	-4.84728271515859
GSE133767	10372130	4930430F08Rik	0.0533725000000005	-0.201734689614486	0.308479689614487	2.05763625	0.442051618264156	0.66412951276574	0.999996701290797	-4.80667616116597
GSE133767	10521702	4930431F12Rik	-0.0297812500000001	-0.319476800499791	0.259914300499791	2.713554375	-0.217209709494187	0.830679477624429	0.999996701290797	-4.83743604127157
GSE133767	10551754	4930432E11Rik	-0.0924150000000001	-0.372842902999891	0.18801290299989	1.97346375	-0.696304786694178	0.495826862446975	0.999996701290797	-4.74784901250064
GSE133767	10573332	4930432K21Rik	-0.13309875	-0.378175061065024	0.111977561065024	2.141855625	-1.14749494078491	0.267369378224664	0.999996701290797	-4.58732095924472
GSE133767	10495668	4930432M17Rik	-0.1021925	-0.393021624926934	0.188636624926935	3.57779375	-0.742436414002219	0.468149875292119	0.999996701290797	-4.73458346764009
GSE133767	10562595	4930433I11Rik	0.0623975000000008	-0.184364623386477	0.309159623386479	2.26638125	0.534277430050979	0.600198740299821	0.999996701290797	-4.78820196696128
GSE133767	10590640	4930433N12Rik	-0.1395125	-0.464559588682033	0.185534588682033	1.60115375	-0.906869879924404	0.377390208169599	0.999996701290797	-4.68122378189421
GSE133767	10439509	4930435E12Rik	-0.149775	-0.35981365767555	0.0602636576755494	2.45192	-1.50667031393309	0.150598396303365	0.999996701290797	-4.4175530948942
GSE133767	10529890	4930435H24Rik	0.0604487499999999	-0.159958260935123	0.280855760935123	2.571061875	0.579482142333642	0.570008137754055	0.999996701290797	-4.77794072404568
GSE133767	10376332	4930438A08Rik	-0.11901625	-0.321373903468188	0.0833414034681882	2.477548125	-1.24269561197578	0.231166095172856	0.999996701290797	-4.54548820644911
GSE133767	10371080	4930442H23Rik	-0.0618212499999999	-0.309127794311601	0.185485294311601	3.309321875	-0.528178003193033	0.604332199250758	0.999996701290797	-4.78952628648518
GSE133767	10368222	4930444G20Rik	0.13836375	-0.222091597144788	0.498819097144788	2.309166875	0.811052540147684	0.428756758266763	0.999996701290797	-4.7134501008678
GSE133767	10353258	4930444P10Rik	0.1307625	-0.122915460847539	0.38444046084754	2.843915	1.08912722518218	0.291583081045561	0.999996701290797	-4.61171035598772
GSE133767	10423791	4930447A16Rik	-0.0382712500000002	-0.340398533936617	0.263856033936617	2.601075625	-0.267646049792799	0.792253051244515	0.999996701290797	-4.83233130932615
GSE133767	10400948	4930447C04Rik	-0.0195449999999999	-0.213829963607808	0.174739963607808	1.3760175	-0.212556613264291	0.834248617070505	0.999996701290797	-4.83785400821075
GSE133767	10604864	4930447F04Rik	0.0582737500000001	-0.17730643273778	0.29385393273778	1.674900625	0.522651678415193	0.608089288598925	0.999996701290797	-4.79071373480938
GSE133767	10511486	4930448K20Rik	0.297425	-0.0222251702758763	0.617075170275877	1.75857625	1.96598711611832	0.0661708401186079	0.999996701290797	-4.16269122972485
GSE133767	10492281	4930449A18Rik	0.0505575000000005	-0.197727906727865	0.298842906727866	2.23751375	0.430241732464627	0.672526886995698	0.999996701290797	-4.80879987211183
GSE133767	10416911	4930449E01Rik	-0.08257125	-0.320961602496269	0.155819102496269	2.294131875	-0.731843669731468	0.474421361610749	0.999996701290797	-4.73769732920098
GSE133767	10409547	4930451E10Rik	-0.0234412500000007	-0.271931724748707	0.225049224748705	2.897709375	-0.199319210413432	0.844422473429512	0.999996701290797	-4.8389939740736
GSE133767	10433340	4930451G09Rik	0.0351262499999998	-0.233227994471263	0.303480494471263	2.903655625	0.276567699000459	0.785509718974629	0.999996701290797	-4.83131921394146
GSE133767	10568060	4930451I11Rik	-0.0384312500000004	-0.324556934140137	0.247694434140136	4.137750625	-0.283795695227428	0.78005934833743	0.999996701290797	-4.83047527846101
GSE133767	10417579	4930452B06Rik	-0.0878500000000004	-0.367851654435029	0.192151654435028	2.56568125	-0.662917227947533	0.516440205575427	0.999996701290797	-4.756966907298
GSE133767	10440284	4930453N24Rik	0.2442875	-0.141023669088815	0.629598669088815	1.97684125	1.33957731416602	0.198349256070562	0.999996701290797	-4.50046424573502
GSE133767	10365339	4930463O16Rik	0.0407912499999994	-0.251321006565156	0.332903506565154	2.127143125	0.295049831917017	0.771596562262386	0.999996701290797	-4.82911860048623
GSE133767	10456889	4930465K10Rik	0.0105300000000004	-0.269818872876459	0.29087887287646	1.9266525	0.0793611027867651	0.937689710554725	0.999996701290797	-4.84599673659627
GSE133767	10579060	4930467E23Rik	-0.18932375	-0.600613063376801	0.221965563376801	2.290139375	-0.972603459680395	0.344644129378864	0.999996701290797	-4.65735632390358
GSE133767	10417275	4930469B13Rik	0.00194375000000013	-0.24985489136823	0.25374239136823	2.267470625	0.0163104206285431	0.987180243867359	0.999996701290797	-4.847262723116
GSE133767	10359419	4930469G21Rik	-0.16620875	-0.440305177893838	0.107887677893837	2.091793125	-1.28123456019507	0.217637244578263	0.999996701290797	-4.52786383432016
GSE133767	10490094	4930470P17Rik	0.00203500000000023	-0.281585803940205	0.285655803940205	2.610435	0.0151601838155959	0.988084237271132	0.999996701290797	-4.84727032245169
GSE133767	10487675	4930473A02Rik	-0.18906	-0.359870653962604	-0.0182493460373966	2.38978375	-2.33863710202969	0.0320826246097889	0.999996701290797	-3.93736092405106
GSE133767	10414156	4930474N05Rik	0.00013749999999968	-0.239387161536426	0.239662161536426	2.11754125	0.00121291565160242	0.999046621179462	0.999996701290797	-4.84731826364693
GSE133767	10600581	4930480E11Rik	0.0272787500000002	-0.278370196576367	0.332927696576367	2.413334375	0.188573082199777	0.852702600084905	0.999996701290797	-4.83986591363263
GSE133767	10425503	4930483J18Rik	-0.151779999999999	-0.425089058109248	0.121529058109249	3.168635	-1.17337994267716	0.257126530936518	0.999996701290797	-4.57619341747487
GSE133767	10409857	4930486L24Rik	0.0718687499999993	-0.15072342657335	0.294460926573349	2.035399375	0.682194686474989	0.504479491597571	0.999996701290797	-4.75175226845209
GSE133767	10351471	4930500M09Rik	0.0442374999999999	-0.233853995359986	0.322328995359985	3.38538	0.336109668485999	0.740979062699939	0.999996701290797	-4.82372989477161
GSE133767	10599663	4930502E18Rik	0.237881249999999	-0.0176095340312573	0.493372034031256	1.888869375	1.96726610865056	0.0660117281635427	0.999996701290797	-4.16193918912723
GSE133767	10502725	4930503B20Rik	0.0362612500000004	-0.182677395178861	0.255199895178862	2.885255625	0.349943943875224	0.730760250087135	0.999996701290797	-4.82175970851724
GSE133767	10414245	4930503E14Rik	-0.108666250000002	-0.333464581710518	0.116132081710515	3.203664375	-1.02136208861239	0.321668372200967	0.999996701290797	-4.63876324326556
GSE133767	10602749	4930503H13Rik	0.2497725	-0.0641852220739254	0.563730222073926	1.7540425	1.68093758776103	0.111401731806425	0.999996701290797	-4.32491513699616
GSE133767	10459643	4930503L19Rik	-0.0721074999999998	-0.309557293798594	0.165342293798595	1.48869	-0.641633128464357	0.529830412482486	0.999996701290797	-4.76256485439618
GSE133767	10386173	4930504O13Rik	-0.114387499999999	-0.32097249860335	0.0921974986033513	4.0956625	-1.16992473761841	0.25847634755556	0.999996701290797	-4.57768960489175
GSE133767	10384930	4930505A04Rik	0.0262075000000002	-0.183280006690731	0.235695006690731	1.83689625	0.264329481393223	0.794764209888531	0.999996701290797	-4.83269920535856
GSE133767	10463513	4930505N22Rik	0.0123525	-0.241402456070633	0.266107456070633	3.96851625	0.102853355951857	0.919305745247524	0.999996701290797	-4.84509879343018
GSE133767	10579913	4930505O20Rik	-0.0283300000000002	-0.355066482525045	0.298406482525044	1.8863075	-0.18320068046256	0.856848874862382	0.999996701290797	-4.84028383918355
GSE133767	10447688	4930506C21Rik	0.30589	0.00322506517999926	0.60855493482	2.06831875	2.13541017602263	0.047868133187616	0.999996701290797	-4.06161505442061
GSE133767	10468762	4930506M07Rik	-0.10486875	-0.316397096669414	0.106659596669413	1.909089375	-1.04750391245221	0.309808995593582	0.999996701290797	-4.62849142165424
GSE133767	10363557	4930507D05Rik	-0.0116762499999998	-0.221180695721102	0.197828195721102	2.157090625	-0.117757419240647	0.907666199273534	0.999996701290797	-4.84440932433364
GSE133767	10585328	4930510E17Rik	-0.0494887500000005	-0.317356275954016	0.218378775954015	2.444459375	-0.390359322127501	0.701210831319972	0.999996701290797	-4.81556056354151
GSE133767	10396121	4930512B01Rik	-0.059895	-0.287800217253395	0.168010217253395	1.96223375	-0.555283078655211	0.586071525221059	0.999996701290797	-4.78353132731874
GSE133767	10384365	4930512M02Rik	0.0149399999999997	-0.15699781330105	0.186877813301049	2.14700125	0.183593514543308	0.856545548277655	0.999996701290797	-4.84025368677955
GSE133767	10574410	4930513N10Rik	-0.10460875	-0.338557865058797	0.129340365058798	3.438184375	-0.944767060540295	0.358262684718914	0.999996701290797	-4.66763407457703
GSE133767	10601973	4930513O06Rik	0.0941712499999996	-0.171685072532417	0.360027572532416	2.826030625	0.748427056485325	0.464625381483451	0.999996701290797	-4.73280468258586
GSE133767	10532888	4930515G01Rik	-0.198971250000001	-0.461489206618343	0.0635467066183416	3.370491875	-1.60143549592476	0.128046939941846	0.999996701290797	-4.36788838369621
GSE133767	10448184	4930515G13Rik	0.12824	-0.214111638624869	0.470591638624869	1.84450625	0.791460482899186	0.439785275794287	0.999996701290797	-4.71965295671205
GSE133767	10416785	4930517O19Rik	0.0290137500000003	-0.174601752802329	0.23262925280233	2.046124375	0.301072549885171	0.767079737913385	0.999996701290797	-4.82837125777454
GSE133767	10489053	4930518I15Rik	0.0357962500000002	-0.372961259111081	0.444553759111081	2.619344375	0.185033313389469	0.855434006711176	0.999996701290797	-4.84014262489822
GSE133767	10368475	4930519F09Rik	-0.150170000000001	-0.339792715718277	0.0394527157182762	2.44020625	-1.67328899940917	0.112917945540318	0.999996701290797	-4.32909807029342
GSE133767	10606163	4930519F16Rik	-0.0492600000000001	-0.240522198005846	0.142002198005846	1.7361375	-0.544181035031428	0.593517162711527	0.999996701290797	-4.78602106252049
GSE133767	10524606	4930519G04Rik	-0.00670875000000004	-0.142911211833723	0.129493711833723	3.128850625	-0.104072212661229	0.918353114459286	0.999996701290797	-4.84504589856044
GSE133767	10488802	4930519P11Rik	-0.0466899999999995	-0.381763635287877	0.288383635287878	3.66774	-0.294416234402596	0.772072233037956	0.999996701290797	-4.82919635874194
GSE133767	10589886	4930520O04Rik	0.02004125	-0.215533750836227	0.255616250836227	1.814423125	0.179752004252406	0.859512753946593	0.999996701290797	-4.84054579126837
GSE133767	10515080	4930522H14Rik	0.0372912500000002	-0.167861813898596	0.242444313898597	1.720083125	0.384067068875743	0.705780504791308	0.999996701290797	-4.81656898586671
GSE133767	10532305	4930522L14Rik	0.00551000000000057	-1.21373322986396	1.22475322986396	3.15144875	0.0095485930227505	0.992494711333119	0.999996701290797	-4.84729943124311
GSE133767	10523513	4930522N08Rik	-0.2166775	-0.445780074452718	0.012425074452718	2.10597125	-1.99830596118994	0.0622543088537075	0.999996701290797	-4.14363227536617
GSE133767	10350977	4930523C07Rik	-0.0544775	-0.313914944512187	0.204959944512187	2.7738725	-0.443672640948626	0.662980444516602	0.999996701290797	-4.80638033807145
GSE133767	10375014	4930524B15Rik	-0.162062500000001	-0.381057566334779	0.0569325663347774	2.82552	-1.5636024436768	0.136682711166646	0.999996701290797	-4.38792822672206
GSE133767	10523516	4930524J08Rik	0.13456875	-0.182759279321669	0.451896779321669	3.465109375	0.896012195638421	0.382994924616337	0.999996701290797	-4.68503047838362
GSE133767	10607425	4930524N10Rik	0.00750749999999978	-0.219284510696021	0.234299510696021	1.86948125	0.069943236834985	0.945070508969408	0.999996701290797	-4.8462917793578
GSE133767	10549582	4930526A20Rik	0.0976912499999996	-0.117987432603081	0.31336993260308	4.602704375	0.95703226962139	0.352217115738226	0.999996701290797	-4.66313609363676
GSE133767	10360540	4930527J03Rik	-0.0431937499999995	-0.242565307692051	0.156177807692052	4.968749375	-0.457757897303837	0.653032746320063	0.999996701290797	-4.8037660743014
GSE133767	10426093	4930529C04Rik	-0.06536125	-0.392639713227629	0.261917213227629	2.274618125	-0.421969498115847	0.678435594117045	0.999996701290797	-4.81025438003199
GSE133767	10363887	4930533K18Rik	-0.0883975000000004	-0.32868047166451	0.151885471664509	2.0185275	-0.777311558486407	0.447859387789657	0.999996701290797	-4.72404915707499
GSE133767	10516225	4930535I16Rik	-0.148958749999999	-0.378193690366347	0.0802761903663483	4.817254375	-1.37297725368686	0.187936346827174	0.999996701290797	-4.48440299761886
GSE133767	10515861	4930538K18Rik	-0.11778625	-0.340535189510534	0.104962689510534	2.324818125	-1.11726729825869	0.27971469836439	0.999996701290797	-4.60007482862207
GSE133767	10449510	4930539E08Rik	-0.152324999999998	-0.365738389497483	0.0610883894974857	3.892805	-1.5080913904161	0.150237190326909	0.999996701290797	-4.41682166575153
GSE133767	10595169	4930542C12Rik	-0.00562749999999745	-0.295544858383611	0.284289858383616	3.88026	-0.04101280017635	0.967772590022646	0.999996701290797	-4.84696547279157
GSE133767	10418164	4930542C16Rik	-0.0151949999999998	-0.215479873567866	0.185089873567867	1.62524375	-0.160298954959319	0.874570767862039	0.999996701290797	-4.84193068075175
GSE133767	10538829	4930544G11Rik	0.0227775000000001	-0.170655894219513	0.216210894219513	1.80577375	0.248801354304037	0.806551903785659	0.999996701290797	-4.83436144712031
GSE133767	10558403	4930544L04Rik	-0.00589249999999963	-0.189159447967937	0.177374447967937	1.89116875	-0.0679350002067845	0.946645057648904	0.999996701290797	-4.8463498833221
GSE133767	10407300	4930544M13Rik	0.103475	-0.103588542696264	0.310538542696265	2.39034625	1.05586873948518	0.306081612914856	0.999996701290797	-4.62516073529835
GSE133767	10459614	4930546C10Rik	-0.0162175000000007	-0.221049360396605	0.188614360396604	2.63594375	-0.167287901901443	0.869154802540337	0.999996701290797	-4.84145126553688
GSE133767	10362669	4930547M16Rik	-0.0519062499999983	-0.380109344883363	0.276296844883367	4.247520625	-0.334160505593026	0.742422901179809	0.999996701290797	-4.82400123547478
GSE133767	10424064	4930548G14Rik	0.0399949999999998	-0.173696915928976	0.253686915928975	1.40231125	0.39545379304514	0.697519651187521	0.999996701290797	-4.81473244869066
GSE133767	10520796	4930548H24Rik	-0.0670112500000002	-0.233500873094181	0.0994783730941803	2.131694375	-0.850430223649857	0.407127937748302	0.999996701290797	-4.70058237886725
GSE133767	10509253	4930549C01Rik	-0.0977900000000003	-0.316819617145354	0.121239617145353	3.6166075	-0.943343235044353	0.358969086450185	0.999996701290797	-4.66815309133972
GSE133767	10585347	4930550C14Rik	0.27659125	0.0844569903671315	0.468725509632869	1.636534375	3.04166767992892	0.00749185617425342	0.999996701290797	-3.50036175590044
GSE133767	10599822	4930550L24Rik	0.1716175	-0.231259676523402	0.574494676523401	2.60412125	0.900050844384841	0.380903705904904	0.999996701290797	-4.68361908401826
GSE133767	10514333	4930553M12Rik	-0.149643749999999	-0.446656899127007	0.147369399127008	2.630930625	-1.06453769342202	0.302253072488645	0.999996701290797	-4.62168668949094
GSE133767	10571763	4930555F03Rik	-0.0910337500000002	-0.403828365941724	0.221760865941723	2.382521875	-0.614923798776459	0.546902832532382	0.999996701290797	-4.76935082779481
GSE133767	10417773	4930555G01Rik	-0.10028625	-0.372672000652648	0.172099500652649	2.659316875	-0.777920371895432	0.447510082827381	0.999996701290797	-4.72386144000511
GSE133767	10383810	4930556J24Rik	0.152908749999999	-0.187307583300742	0.493125083300741	2.980885625	0.949631945217204	0.355856281263881	0.999996701290797	-4.66585578062217
GSE133767	10488584	4930556L07Rik	-0.14005125	-0.428020705696858	0.147918205696858	2.844998125	-1.02758723604755	0.318815313770598	0.999996701290797	-4.63633619617709
GSE133767	10598601	4930557A04Rik	0.0658325000000004	-0.213292459589132	0.344957459589133	3.14138875	0.498333188671031	0.624755847464677	0.999996701290797	-4.79579805682514
GSE133767	10408241	4930558J22Rik	0.0103650000000002	-0.231289960721453	0.252019960721453	1.448745	0.0906257740292698	0.928869300096445	0.999996701290797	-4.84559501550901
GSE133767	10359473	4930558K02Rik	0.0745537500000002	-0.101293732799719	0.250401232799719	2.032656875	0.895800858644939	0.383104566368304	0.999996701290797	-4.68510418594024
GSE133767	10433302	4930562C15Rik	-0.0277375000000002	-0.24868507017387	0.193210070173869	2.38780625	-0.265250506974774	0.794066615826879	0.999996701290797	-4.83259749286419
GSE133767	10359303	4930562F07Rik	-0.0870712499999995	-0.442886103550588	0.268743603550589	2.039683125	-0.51704559526144	0.611912182088028	0.999996701290797	-4.79190621735738
GSE133767	10440985	4930563D23Rik	-0.00874000000000041	-0.283866080760405	0.266386080760404	2.05686375	-0.0671209057435273	0.94728340988753	0.999996701290797	-4.84637295566062
GSE133767	10378065	4930563E22Rik	-0.159540000000001	-0.432882763944762	0.113802763944761	2.54644875	-1.23321881892567	0.234590899130052	0.999996701290797	-4.54976252492603
GSE133767	10416488	4930564B18Rik	-0.0904775	-0.338896416868425	0.157941416868425	2.62201	-0.769545079084184	0.45233020932829	0.999996701290797	-4.72643236122386
GSE133767	10495077	4930564D02Rik	0.0490662500000001	-0.1796153213109	0.2777478213109	2.295633125	0.453346050858075	0.656141484863856	0.999996701290797	-4.80459337114647
GSE133767	10604918	4930567H17Rik	-0.142165000000001	-0.416085535148363	0.131755535148362	1.61649125	-1.09659493389524	0.288397992372649	0.999996701290797	-4.60864515101181
GSE133767	10482045	4930568D16Rik	-0.127678750000001	-0.319982858095924	0.0646253580959227	2.309154375	-1.40284018357121	0.179003213384804	0.999996701290797	-4.46981915621523
GSE133767	10524842	4930569F06Rik	-0.0337012499999996	-0.261135506977341	0.193733006977342	1.454071875	-0.313089329389441	0.758093508471529	0.999996701290797	-4.82683581080972
GSE133767	10418244	4930570N19Rik	0.137595	-0.119857004856898	0.395047004856898	2.4229175	1.12923547133425	0.274777002148642	0.999996701290797	-4.59505644055754
GSE133767	10557315	4930571K23Rik	-0.0914600000000001	-0.32553560550313	0.14261560550313	2.41699875	-0.82556862348044	0.420699805647043	0.999996701290797	-4.70876851214282
GSE133767	10528183	4930572O03Rik	-0.117985	-0.335453741550702	0.099483741550701	2.5180825	-1.14632586805397	0.26783912240137	0.999996701290797	-4.58781907097815
GSE133767	10491920	4930577N17Rik	-0.0137412500000003	-0.230150835469315	0.202668335469315	3.317104375	-0.134161493764888	0.894880288433588	0.999996701290797	-4.84354307864485
GSE133767	10603796	4930578C19Rik	0.0952787500000001	-0.198595601928441	0.389153101928441	2.038495625	0.685034593893211	0.502731032465989	0.999996701290797	-4.75097252238299
GSE133767	10504139	4930578G10Rik	0.0360650000000016	-0.118360518613726	0.190490518613729	3.65153625	0.493452104218661	0.628126891059964	0.999996701290797	-4.7967907671935
GSE133767	10420798	4930578I06Rik	-0.0356912499999997	-0.266009173650423	0.194626673650423	2.059069375	-0.327425243333504	0.747419626184769	0.999996701290797	-4.82492695028272
GSE133767	10587665	4930579C12Rik	0.10434375	-0.0823606186507259	0.291048118650725	1.737230625	1.18083739487365	0.25423140558801	0.999996701290797	-4.57295285811903
GSE133767	10502395	4930579F01Rik	0.11409625	-0.131124192448497	0.359316692448498	2.323556875	0.983088999011252	0.339608861867859	0.999996701290797	-4.6534208459637
GSE133767	10415092	4930579G18Rik	0.0482825000000009	-0.25904498754319	0.355609987543191	2.9770075	0.331945267151607	0.744065036862854	0.999996701290797	-4.82430774103054
GSE133767	10492679	4930579G24Rik	-0.112785000000001	-0.363381097725556	0.137811097725555	4.4616775	-0.950944513831203	0.355208932959349	0.999996701290797	-4.66537468313149
GSE133767	10595895	4930579K19Rik	0.03342	-0.232236591415656	0.299076591415656	2.147545	0.26580551455016	0.793646334303548	0.999996701290797	-4.83253603265765
GSE133767	10584187	4930581F22Rik	0.0223387500000003	-0.302273515921364	0.346951015921364	2.303036875	0.145402568694128	0.886135568153726	0.999996701290797	-4.84288456314226
GSE133767	10452445	4930583I09Rik	-0.201767499999999	-0.429147295558199	0.0256122955581998	2.22538	-1.87489727775422	0.0784262673400788	0.999996701290797	-4.21575101830622
GSE133767	10556613	4930583K01Rik	0.0435350000000003	-0.183008647943978	0.270078647943979	2.5621175	0.406036239167303	0.68987720431983	0.999996701290797	-4.81297898078609
GSE133767	10528827	4930584F24Rik	-0.0117374999999997	-0.266323854331056	0.242848854331057	1.76666625	-0.0974133817878368	0.923559027341521	0.999996701290797	-4.84532729037669
GSE133767	10434226	4930588K23Rik	-0.148197499999999	-0.401489638692451	0.105094638692452	4.56822125	-1.23622437849516	0.233500499694714	0.999996701290797	-4.54840950275444
GSE133767	10492668	4930589L23Rik	0.0228600000000005	-0.261712832248862	0.307432832248863	2.60642375	0.169730905070223	0.867263204505726	0.999996701290797	-4.84127888554131
GSE133767	10540148	4930590J08Rik	0.0219087500000001	-0.213943463339091	0.257760963339091	2.530175625	0.196270839798626	0.846769448263181	0.999996701290797	-4.83924619121783
GSE133767	10479270	4930591A17Rik	-0.0467712499999982	-0.347529022792875	0.253986522792879	2.886273125	-0.3285793409022	0.746562598993748	0.999996701290797	-4.82476963795508
GSE133767	10417208	4930594M22Rik	0.0291224999999988	-0.23199945540795	0.290244455407948	3.9803075	0.23564780670148	0.816574820236098	0.999996701290797	-4.83569170720999
GSE133767	10605561	4930595M18Rik	-0.145821249999999	-0.379960640801061	0.0883181408010619	1.837996875	-1.31590479658249	0.206004724064189	0.999996701290797	-4.51168385139648
GSE133767	10418982	4930596D02Rik	-0.105032500000001	-0.347578618979725	0.137513618979724	3.503505	-0.914971381101832	0.373244361495648	0.999996701290797	-4.67835807607255
GSE133767	10545127	4930597O21Rik	-0.000496249999999421	-0.249392116673799	0.2483996166738	5.268360625	-0.00421270426637896	0.996688729779639	0.999996701290797	-4.84731484673918
GSE133767	10537426	4930599N23Rik	-0.0822650000000005	-0.333519617781029	0.168989617781029	4.0859775	-0.691797816534478	0.498581205664996	0.999996701290797	-4.74910367685938
GSE133767	10599863	4931400O07Rik	-0.12565	-0.32646139278255	0.0751613927825497	1.7290625	-1.32206339841037	0.203990864610783	0.999996701290797	-4.50877826072523
GSE133767	10413180	4931403M11Rik	-0.127711249999999	-0.328102270959935	0.0726797709599365	2.043073125	-1.34657031104857	0.196131735124849	0.999996701290797	-4.49712368707496
GSE133767	10562696	4931406B18Rik	-0.11030375	-0.350029916186929	0.129422416186928	2.530114375	-0.972194085566713	0.344841765076841	0.999996701290797	-4.65750926530766
GSE133767	10591022	4931406C07Rik	-0.20355625	-0.480413517341287	0.0733010173412875	2.350713125	-1.55348352131315	0.139073987933543	0.999996701290797	-4.3932411288546
GSE133767	10562368	4931406P16Rik	-0.0988999999999987	-0.276601375497923	0.0788013754979252	2.70058625	-1.17593587371551	0.256131467841186	0.999996701290797	-4.57508450116429
GSE133767	10353669	4931408C20Rik	-0.0253900000000007	-0.22362085504765	0.172840855047648	2.12761	-0.270626040754777	0.78999873900059	0.999996701290797	-4.83199689010935
GSE133767	10528630	4931409K22Rik	0.0467650000000002	-0.200648595755778	0.294178595755779	2.27242625	0.399370070400415	0.694687425764144	0.999996701290797	-4.81408876997555
GSE133767	10419803	4931414P19Rik	-0.0253924999999999	-0.274166826641459	0.223381826641459	1.80254125	-0.215664190197973	0.831864543353477	0.999996701290797	-4.83757586330996
GSE133767	10570199	4931415C17Rik	0.0143137500000003	-0.300388290950361	0.329015790950362	2.457534375	0.0961019069522122	0.924584775464111	0.999996701290797	-4.845380523018
GSE133767	10545524	4931417E11Rik	-0.0297449999999995	-0.25575276629693	0.196262766296931	1.819265	-0.278079355026973	0.784368872986716	0.999996701290797	-4.83114448773276
GSE133767	10485540	4931422A03Rik	-0.0522749999999998	-0.261867682159843	0.157317682159843	1.72238875	-0.526982342200686	0.605144108213835	0.999996701290797	-4.78978420285777
GSE133767	10469755	4931423N10Rik	-0.11409	-0.345889035505738	0.117709035505737	1.42084375	-1.03995391170352	0.313201299681639	0.999996701290797	-4.63147945072945
GSE133767	10581188	4931428F04Rik	0.02215875	-0.238161282930084	0.282478782930084	2.957869375	0.179852220642821	0.859435318464175	0.999996701290797	-4.84053824889017
GSE133767	10353721	4931428L18Rik	-0.0367962499999996	-0.237311278620516	0.163718778620517	2.246801875	-0.387734789247278	0.703115444502334	0.999996701290797	-4.81598311694342
GSE133767	10592493	4931429I11Rik	0.0234587499999996	-0.166176701421233	0.213094201421232	2.528471875	0.261374656120914	0.797003431729462	0.999996701290797	-4.83302316186921
GSE133767	10593177	4931429L15Rik	-0.0549950000000003	-0.288329751983493	0.178339751983492	3.13508875	-0.497991486056119	0.624991561232446	0.999996701290797	-4.79586785514308
GSE133767	10409044	4931429P17Rik	0.0490899999999996	-0.142796679435824	0.240976679435823	2.26402875	0.540538138679874	0.595970559127976	0.999996701290797	-4.78682767619026
GSE133767	10529480	4931431C16Rik	0.0216799999999995	-0.26431227533522	0.307672275335219	2.53223125	0.160170714221434	0.874670206697157	0.999996701290797	-4.84193928742141
GSE133767	10566304	4931431F19Rik	-0.0783049999999998	-0.382624275366663	0.226014275366663	2.83375625	-0.543673506389605	0.593858667250653	0.999996701290797	-4.78613374668865
GSE133767	10384883	4931440F15Rik	-0.0876487500000009	-0.368705973232581	0.193408473232579	1.908416875	-0.658914573028267	0.518943652972629	0.999996701290797	-4.75803246666811
GSE133767	10490824	4931440P22Rik	-0.0304862499999992	-0.299373867758251	0.238401367758253	6.565045625	-0.239558365085201	0.813591489311135	0.999996701290797	-4.83530368171693
GSE133767	10389754	4932411E22Rik	-0.16331375	-0.384042242230923	0.0574147422309221	3.594751875	-1.5633005898152	0.136753540339569	0.999996701290797	-4.3880870050199
GSE133767	10606583	4932411N23Rik	-0.0340575000000001	-0.28483290823999	0.21671790823999	1.62675	-0.286949819882888	0.77768461305338	0.999996701290797	-4.83010028709149
GSE133767	10439520	4932412D23Rik	0.0126775000000001	-0.245427545009354	0.270782545009354	2.08834125	0.10378038153469	0.918581191457425	0.999996701290797	-4.84505861981098
GSE133767	10445935	4932414J04Rik	-0.00548500000000018	-0.227433578521945	0.216463578521944	2.19399125	-0.0522158559108867	0.958976918219636	0.999996701290797	-4.84674624908552
GSE133767	10472469	4932414N04Rik	-0.0914800000000002	-0.301212159275804	0.118252159275803	1.88133875	-0.921593207329639	0.369878671093628	0.999996701290797	-4.6759997686666
GSE133767	10371286	4932415D10Rik	-0.100385	-0.363875349407527	0.163105349407528	1.74218125	-0.804974730237728	0.432159089899774	0.999996701290797	-4.71538861775223
GSE133767	10574508	4932416K20Rik	-0.0181274999999999	-0.273548684537045	0.237293684537045	2.814235	-0.149954373398854	0.882598838450757	0.999996701290797	-4.84260291036752
GSE133767	10480939	4932418E24Rik	0.0796899999999998	-0.114394471040318	0.273774471040317	2.8498925	0.867543331354854	0.397953431783481	0.999996701290797	-4.69482546372251
GSE133767	10531479	4932430I15Rik	0.0405862499999992	-0.200974426268914	0.282146926268913	2.102901875	0.355002021971073	0.727036924461251	0.999996701290797	-4.82101999558085
GSE133767	10551750	4932431P20Rik	-0.0811537499999995	-0.246140377480911	0.0838328774809124	2.702935625	-1.03929295861678	0.313499540171428	0.999996701290797	-4.63174020761615
GSE133767	10392787	4932435O22Rik	-0.15001875	-0.322209861629775	0.0221723616297753	2.491449375	-1.84082689122181	0.0835052180610877	0.999996701290797	-4.23532554648238
GSE133767	10491611	4932438A13Rik	-0.0566199999999988	-0.364517600649879	0.251277600649881	3.14212	-0.388545333790761	0.702527017572119	0.999996701290797	-4.81585291361617
GSE133767	10440903	4932438H23Rik	-0.0475350000000008	-0.295431118309782	0.20036111830978	2.41092	-0.405155658833938	0.690511841419624	0.999996701290797	-4.8131266008386
GSE133767	10605753	4932442L08Rik	-0.00966000000000022	-0.193223165693587	0.173903165693587	1.70915625	-0.111191022721082	0.912791818310888	0.999996701290797	-4.84472454229492
GSE133767	10576840	4932443L11Rik	-0.101474999999999	-0.322391863614288	0.119441863614289	2.38006875	-0.970528578730421	0.345646644268143	0.999996701290797	-4.65813094666673
GSE133767	10607945	4933400A11Rik	0.0150637499999999	-0.181989695886471	0.212117195886471	1.198588125	0.161520333600251	0.873623810312079	0.999996701290797	-4.84184836640566
GSE133767	10601430	4933401B06Rik	-0.0356299999999998	-0.389011471978341	0.317751471978342	2.92243125	-0.213034619186418	0.833881791099344	0.999996701290797	-4.8378114845267
GSE133767	10355134	4933402D24Rik	0.0526412499999998	-0.201906947246043	0.307189447246043	2.188299375	0.436952576938911	0.667749603339122	0.999996701290797	-4.80759989376899
GSE133767	10599858	4933402E13Rik	0.0468387499999992	-0.172258889668163	0.265936389668161	2.037315625	0.451695469612321	0.657306218897106	0.999996701290797	-4.80490090460781
GSE133767	10573696	4933402J07Rik	0.0792725000000001	-0.143743504419349	0.30228850441935	1.58510375	0.751042755399951	0.463091547217643	0.999996701290797	-4.7320239959907
GSE133767	10568496	4933402N03Rik	-0.0960437500000006	-0.294066345865235	0.101978845865234	3.150788125	-1.02478437848481	0.320097650851626	0.999996701290797	-4.63743044366672
GSE133767	10519677	4933402N22Rik	0.13959625	-0.0264490918843501	0.305641591884351	1.901394375	1.77633630659112	0.093919051195847	0.999996701290797	-4.27193248336774
GSE133767	10387651	4933402P03Rik	0.0561875000000001	-0.281153459923104	0.393528459923104	2.80540125	0.351923906573896	0.729301938963157	0.999996701290797	-4.82147138547146
GSE133767	10369225	4933403O03Rik	-0.0364287499999989	-0.224096007966139	0.151238507966141	4.540179375	-0.410141672490253	0.686921554866762	0.999996701290797	-4.81228665190673
GSE133767	10574872	4933405L10Rik	-0.081354999999999	-0.377469111675054	0.214759111675056	3.11703875	-0.580501414034121	0.569336600704944	0.999996701290797	-4.77770033894306
GSE133767	10553471	4933405O20Rik	0.0117612500000006	-0.307996403092111	0.331518903092112	2.253413125	0.0777160414270202	0.938978546368743	0.999996701290797	-4.84605095305789
GSE133767	10475427	4933406J08Rik	-0.263027499999999	-0.527768440449688	0.00171344044968919	1.83208625	-2.0992211200537	0.0513369278292289	0.999996701290797	-4.08343159850805
GSE133767	10349997	4933406M09Rik	0.14979875	-0.119935963585685	0.419533463585685	1.986368125	1.17340918924567	0.257115128254948	0.999996701290797	-4.57618073882415
GSE133767	10368173	4933406P04Rik	0.0658349999999999	-0.143883921995937	0.275553921995937	1.3972425	0.663280700024853	0.516213212148475	0.999996701290797	-4.75686985299412
GSE133767	10507903	4933407E24Rik	-0.106031249999999	-0.325492642498948	0.11343014249895	3.758164375	-1.02083108956933	0.321912575346398	0.999996701290797	-4.6389697157658
GSE133767	10347988	4933407L21Rik	0.124585	-0.178132807836753	0.427302807836754	2.6376625	0.869572754698889	0.396874523448319	0.999996701290797	-4.69413620308555
GSE133767	10458130	4933408B17Rik	-0.0321862500000001	-0.300553401429737	0.236180901429736	2.077243125	-0.253407323044439	0.803050273469486	0.999996701290797	-4.83387875538603
GSE133767	10365812	4933408J17Rik	0.0645524999999996	-0.200096700114108	0.329201700114107	2.548145	0.515371760463407	0.613055849858982	0.999996701290797	-4.79225989623214
GSE133767	10472449	4933409G03Rik	0.0193874999999999	-0.230977869206916	0.269752869206916	1.62409125	0.163615970011752	0.87199948585319	0.999996701290797	-4.84170568343661
GSE133767	10369038	4933411G06Rik	-0.18550875	-0.42125375630466	0.0502362563046605	1.277905625	-1.66264692822483	0.115057073913414	0.999996701290797	-4.33490129737982
GSE133767	10527164	4933411G11Rik	0.00965125000000011	-0.295433805735837	0.314736305735837	2.052529375	0.0668406659169531	0.947503161659974	0.999996701290797	-4.84638083366833
GSE133767	10463209	4933411K16Rik	-0.0564074999999984	-0.350092471822754	0.237277471822758	3.11171375	-0.405819830893251	0.690033148411496	0.999996701290797	-4.81301528813346
GSE133767	10436498	4933411O13Rik	-0.130955	-0.352546504513641	0.0906365045136406	2.2810275	-1.24866838505541	0.229027603471385	0.999996701290797	-4.542782126812
GSE133767	10464407	4933412A08Rik	-0.0488650000000002	-0.290928447409255	0.193198447409255	2.6962525	-0.426527292851739	0.67517734182064	0.999996701290797	-4.80945635446654
GSE133767	10428910	4933412E24Rik	0.00861250000000036	-0.226591925939905	0.243816925939906	2.37396875	0.0773680912315226	0.939251173085868	0.999996701290797	-4.84606227515934
GSE133767	10413270	4933413J09Rik	-0.0685012500000002	-0.260372760245504	0.123370260245504	2.475993125	-0.754338267190042	0.46116346784871	0.999996701290797	-4.73103694346675
GSE133767	10385671	4933414I15Rik	-0.192738749999999	-0.48674548290796	0.101267982907962	3.383051875	-1.38512797038094	0.184259127812462	0.999996701290797	-4.47849419038175
GSE133767	10375322	4933415A04Rik	-0.106775	-0.364125401556079	0.150575401556078	1.98349375	-0.876643197438455	0.393130713710348	0.999996701290797	-4.69172403532628
GSE133767	10353519	4933415F23Rik	0.0586924999999998	-0.141600303938677	0.258985303938677	1.74220625	0.619149318916577	0.544182209188629	0.999996701290797	-4.76829506055304
GSE133767	10372524	4933416C03Rik	-0.0659350000000001	-0.293330480008511	0.161460480008511	1.97620125	-0.612649833640723	0.548369975269837	0.999996701290797	-4.7699162104176
GSE133767	10404566	4933417A18Rik	0.17535625	-0.0329716915649814	0.383684191564982	1.978690625	1.77849178726084	0.0935533907693437	0.999996701290797	-4.27071880827774
GSE133767	10562643	4933421I07Rik	-0.0274162499999995	-0.282311246528862	0.227478746528863	2.532528125	-0.227260981685776	0.822982796366238	0.999996701290797	-4.83650257854336
GSE133767	10382523	4933422H20Rik	0.00106374999999925	-0.181029287354651	0.18315678735465	2.593273125	0.0123431034879443	0.990298303283891	0.999996701290797	-4.84728658802938
GSE133767	10407024	4933425L06Rik	-0.167925	-0.440076267271943	0.104226267271943	1.79574625	-1.30371641365682	0.210036758896363	0.999996701290797	-4.51740643568324
GSE133767	10396919	4933426M11Rik	0.0289787500000003	-0.125012685188356	0.182970185188356	2.255646875	0.397613589269918	0.695957128597374	0.999996701290797	-4.81437822576258
GSE133767	10539921	4933427D06Rik	0.08184375	-0.1478140031465	0.311501503146499	3.145541875	0.752978447852987	0.461958452575445	0.999996701290797	-4.73144469687647
GSE133767	10388132	4933427D14Rik	-0.12508	-0.360465438268726	0.110305438268727	2.32855625	-1.12275867003558	0.277441007757777	0.999996701290797	-4.59777736090692
GSE133767	10424660	4933427E11Rik	0.0760312500000002	-0.203184204928422	0.355246704928423	3.910853125	0.575348273902294	0.572735917821283	0.999996701290797	-4.77891159809568
GSE133767	10374739	4933427E13Rik	-0.0398287500000005	-0.258312118893047	0.178654618893046	1.693601875	-0.385173526709883	0.704976106769634	0.999996701290797	-4.81639281401937
GSE133767	10557060	4933427G17Rik	0.0243225000000002	-0.240256755393732	0.288901755393732	2.8480375	0.194236372824087	0.848336635137337	0.999996701290797	-4.83941237279071
GSE133767	10528519	4933427G23Rik	-0.3527225	-0.781565650348319	0.0761206503483183	2.77206625	-1.73785214191925	0.100661055148567	0.999996701290797	-4.29348144917166
GSE133767	10507880	4933427I04Rik	0.26835375	0.0224659317829747	0.514241568217025	2.611189375	2.30594419190598	0.0342424419140616	0.999996701290797	-3.95751548167588
GSE133767	10390426	4933428G20Rik	-0.108687499999998	-0.534439943048585	0.317064943048588	3.48716125	-0.53938714007076	0.596746775264433	0.999996701290797	-4.7870814675365
GSE133767	10601978	4933428M09Rik	-0.19860125	-0.448942778754199	0.051740278754198	2.206279375	-1.67620532072755	0.112337748706014	0.999996701290797	-4.32750434989065
GSE133767	10497644	4933429H19Rik	-0.00284250000000164	-0.225225477475191	0.219540477475187	5.98861	-0.0270070451164874	0.978774588114182	0.999996701290797	-4.84716545228121
GSE133767	10505308	4933430I17Rik	-0.0648399999999998	-0.245011693794073	0.115331693794074	2.04857625	-0.760386822735116	0.45763745906837	0.999996701290797	-4.72921527260117
GSE133767	10501183	4933431E20Rik	-0.13881875	-0.428039206039131	0.150401706039131	3.679738125	-1.01413847638791	0.325001794306818	0.999996701290797	-4.64156459366415
GSE133767	10480621	4933433C11Rik	0.0330412499999997	-0.210942910281846	0.277025410281845	2.862928125	0.28613631107915	0.778296886559434	0.999996701290797	-4.83019739493949
GSE133767	10409986	4933434E20Rik	-0.00969375000000072	-0.460883705809209	0.441496205809208	3.400980625	-0.045395262253428	0.964331284653475	0.999996701290797	-4.84688598728849
GSE133767	10382336	4933434M16Rik	-0.0249224999999993	-0.264331228285318	0.21448622828532	3.08329875	-0.219952935371185	0.828577077453717	0.999996701290797	-4.83718542717389
GSE133767	10604885	4933436I01Rik	-0.0448049999999993	-0.241121087308558	0.151511087308559	1.50039625	-0.482223897884166	0.635913613448815	0.999996701290797	-4.79903894362869
GSE133767	10376507	4933439C10Rik	-0.0711937499999999	-0.279839095875683	0.137451595875683	3.064866875	-0.720960223791662	0.480917167126954	0.999996701290797	-4.7408546811632
GSE133767	10567739	4933440M02Rik	0.10830125	-0.126500778255134	0.343103278255134	1.894628125	0.974562648474193	0.343699374032072	0.999996701290797	-4.65662363815708
GSE133767	10547204	4933440N22Rik	-0.0368650000000015	-0.280523513235797	0.206793513235794	5.19030875	-0.31967655442917	0.753182546969951	0.999996701290797	-4.82596910942808
GSE133767	10528821	5031410I06Rik	-0.0315525000000001	-0.260113556205129	0.197008556205129	2.16001375	-0.291682033034945	0.774125994574153	0.999996701290797	-4.82953002803864
GSE133767	10416423	5031414D18Rik	0.018829999999999	-0.240008196487879	0.277668196487877	2.28807625	0.153709281380013	0.879683212968477	0.999996701290797	-4.84236406131297
GSE133767	10528482	5031425E22Rik	0.1068125	-0.196332105007628	0.409957105007627	2.53842125	0.7444754376529	0.466948437894899	0.999996701290797	-4.73397946413825
GSE133767	10546812	5031434C07Rik	-0.0775749999999995	-0.262941300458616	0.107791300458617	3.01446625	-0.884237927589962	0.389135404371262	0.999996701290797	-4.6891143474989
GSE133767	10431170	5031439G07Rik	-0.0978237499999994	-0.381426771495995	0.185779271495996	2.648823125	-0.728805415262551	0.476229438448662	0.999996701290797	-4.73858303265068
GSE133767	10404895	5033430I15Rik	0.0403837500000006	-0.242416771969007	0.323184271969009	2.820468125	0.301720330832457	0.766594436288748	0.999996701290797	-4.82828999242727
GSE133767	10411390	5330416C01Rik	0.242543749999999	0.0321784469806192	0.45290905301938	1.773223125	2.43609440868881	0.0263767366809011	0.999996701290797	-3.87700825306225
GSE133767	10501374	5330417C22Rik	-0.0716175000000008	-0.315281802923196	0.172046802923195	3.359975	-0.621019710946263	0.542980297335876	0.999996701290797	-4.7678255921842
GSE133767	10566630	5330417H12Rik	-0.232131249999999	-0.45392404847957	-0.010338451520428	2.621534375	-2.21138473116676	0.04127505060296	0.999996701290797	-4.01547754699407
GSE133767	10439881	5330426P16Rik	0.00613125000000059	-0.29902055387539	0.311283053875391	2.827009375	0.0424532770986238	0.966641387324791	0.999996701290797	-4.84694023582239
GSE133767	10366519	5330438D12Rik	0.123493749999999	-0.148455886114876	0.395443386114874	2.867258125	0.959477144143348	0.351020501346923	0.999996701290797	-4.66223371990875
GSE133767	10359814	5330438I03Rik	0.117828749999999	-0.166508897385397	0.402166397385395	4.200756875	0.875578405496381	0.39369302407212	0.999996701290797	-4.69208837467176
GSE133767	10542223	5430401F13Rik	-0.22328875	-0.469758983846351	0.0231814838463507	1.573416875	-1.91416998756993	0.072913727239744	0.999996701290797	-4.19299928543272
GSE133767	10605482	5430402E10Rik	0.0626587499999998	-0.148003036619216	0.273320536619215	2.194593125	0.628454877091246	0.538216785070336	0.999996701290797	-4.76594639119633
GSE133767	10532305	5430403G16Rik	0.00551000000000057	-1.21373322986396	1.22475322986396	3.15144875	0.0095485930227505	0.992494711333119	0.999996701290797	-4.84729943124311
GSE133767	10504419	5430416O09Rik	0.0986800000000005	-0.092951365438647	0.290311365438648	2.04308125	1.0880295333797	0.292053431346915	0.999996701290797	-4.61215953107351
GSE133767	10558192	5430419D17Rik	-0.0540124999999998	-0.282516212778821	0.174491212778822	2.98845125	-0.499435208745203	0.623995936145092	0.999996701290797	-4.79557264051899
GSE133767	10600698	5430427O19Rik	0.08643	-0.180954694899746	0.353814694899746	2.08929375	0.682977042550837	0.503997465530764	0.999996701290797	-4.75153775387575
GSE133767	10349661	5430435G22Rik	-0.100065	-0.36210940134206	0.16197940134206	1.9993775	-0.80683634188071	0.431115157334851	0.999996701290797	-4.71479621803671
GSE133767	10542267	5530400C23Rik	-0.22926125	-0.620074267769692	0.161551767769693	2.155453125	-1.2394807088487	0.23232355381551	0.999996701290797	-4.54694088789968
GSE133767	10379505	5530401A14Rik	-0.0331937500000001	-0.245714189058848	0.179326689058847	1.596808125	-0.330015054304901	0.745496923018866	0.999996701290797	-4.82457318263821
GSE133767	10508178	5730409E04Rik	-0.12116	-0.302139883988827	0.0598198839888274	4.15657	-1.41451349919495	0.175606280934832	0.999996701290797	-4.46406231955643
GSE133767	10389010	5730455P16Rik	0.0362012499999997	-0.170705711322572	0.243108211322572	1.662309375	0.369680549687127	0.716271933045462	0.999996701290797	-4.81881474690223
GSE133767	10502900	5730460C07Rik	0.0849074999999995	-0.151700836094676	0.321515836094675	2.69689125	0.758218103495955	0.458899811521086	0.999996701290797	-4.72986992912253
GSE133767	10394802	5730507C01Rik	-0.0514837499999996	-0.578711686347532	0.475744186347533	2.754800625	-0.206324069781758	0.839035101221769	0.999996701290797	-4.8383997902097
GSE133767	10502071	5730508B09Rik	0.0593499999999993	-0.103661919046475	0.222361919046474	1.83690625	0.769271247454013	0.452488343423358	0.999996701290797	-4.72651600032196
GSE133767	10384776	5730522E02Rik	0.00634749999999862	-0.241199134505943	0.25389413450594	6.61715	0.0541781062425216	0.95743685674603	0.999996701290797	-4.84670243166316
GSE133767	10358177	5730559C18Rik	0.0958912500000002	-0.0606249259709561	0.252407425970957	3.477193125	1.29448758200676	0.213131034654503	0.999996701290797	-4.5217146955927
GSE133767	10538305	5730596B20Rik	-0.109807500000001	-0.360584739967897	0.140969739967896	2.613865	-0.925171025380111	0.368068758952582	0.999996701290797	-4.67471959039757
GSE133767	10558631	5830411N06Rik	-0.0133762499999994	-0.19065519922264	0.163902699222641	2.660961875	-0.159424603465534	0.875248789423736	0.999996701290797	-4.8419892254889
GSE133767	10512747	5830415F09Rik	-0.0317587499999989	-0.262333253780144	0.198815753780146	2.530414375	-0.291024971377111	0.774619796389361	0.999996701290797	-4.8296097564202
GSE133767	10468527	5830416P10Rik	0.0538012500000007	-0.1741560263569	0.281758526356902	2.195068125	0.498674365699946	0.624520538076869	0.999996701290797	-4.79572832035391
GSE133767	10532305	5830428H23Rik	0.00551000000000057	-1.21373322986396	1.22475322986396	3.15144875	0.0095485930227505	0.992494711333119	0.999996701290797	-4.84729943124311
GSE133767	10590323	5830454E08Rik	0.0451275000000013	-0.204228148228662	0.294483148228665	2.76891625	0.382384431643142	0.707004475138728	0.999996701290797	-4.81683595372809
GSE133767	10597134	5830462I19Rik	-0.0840749999999999	-0.266420491380737	0.0982704913807372	2.067395	-0.974204168876267	0.343872104113458	0.999996701290797	-4.65675779125362
GSE133767	10523111	5830473C10Rik	-0.14272875	-0.382989162744199	0.0975316627441989	1.726973125	-1.25518395999523	0.226712332900131	0.999996701290797	-4.53981944261416
GSE133767	10362534	5930403N24Rik	-0.0324724999999999	-0.237245202328036	0.172300202328036	2.61005375	-0.335059395903751	0.741756926625433	0.999996701290797	-4.82387629386497
GSE133767	10534014	5930412G12Rik	0.0275899999999991	-0.149393056363519	0.204573056363517	2.8018	0.329380699087984	0.745967715569826	0.999996701290797	-4.82466008782863
GSE133767	10427049	6030408B16Rik	-0.0369012499999988	-0.294181878359761	0.220379378359764	4.245929375	-0.303048492024055	0.765599723305183	0.999996701290797	-4.82812283545993
GSE133767	10585834	6030419C18Rik	-0.175483749999999	-0.370941643352736	0.0199741433527383	3.812571875	-1.89697597278032	0.0752832003946911	0.999996701290797	-4.20298434658842
GSE133767	10509244	6030445D17Rik	-0.0518037500000004	-0.348113339667107	0.244505839667106	2.344713125	-0.369397225375841	0.716479145425285	0.999996701290797	-4.81885813643428
GSE133767	10575029	6030452D12Rik	0.0751137500000003	-0.159063643848054	0.309291143848054	2.486106875	0.677723606361438	0.50723930558981	0.999996701290797	-4.75297388847055
GSE133767	10427849	6030458C11Rik	0.29495125	-0.000348271488824825	0.590250771488824	2.409683125	2.1104041639108	0.0502412243474858	0.999996701290797	-4.07670179571975
GSE133767	10382973	6030468B19Rik	0.0240225000000005	-0.181031064511502	0.229076064511503	2.83186375	0.247530669312007	0.807518675542677	0.999996701290797	-4.83449307143688
GSE133767	10599342	6030498E09Rik	0.39000625	0.161159989658979	0.618852510341021	1.444640625	3.60085707913283	0.00226206592740541	0.999996701290797	-3.16542367600903
GSE133767	10417946	6230400D17Rik	0.1327725	-0.241964710928202	0.507509710928202	2.64413375	0.748616594579866	0.464514133550659	0.999996701290797	-4.73274819460272
GSE133767	10360664	6330403A02Rik	-0.0487799999999998	-0.28267119991334	0.18511119991334	4.378545	-0.440662456703217	0.665114912096562	0.999996701290797	-4.80692884198981
GSE133767	10388042	6330403K07Rik	-0.00743500000000097	-0.32262552199891	0.307755521998908	2.88467125	-0.049840909717113	0.960841104898022	0.999996701290797	-4.84679712127457
GSE133767	10526880	6330403L08Rik	-0.0132687499999991	-0.217680333904836	0.191142833904838	5.079241875	-0.137152158006453	0.892552362486272	0.999996701290797	-4.84337303330036
GSE133767	10560097	6330408A02Rik	0.0711937499999991	-0.0752093618055064	0.217596861805505	2.545653125	1.02747129757362	0.318868283949545	0.999996701290797	-4.63638150690401
GSE133767	10481678	6330409D20Rik	-0.0446825	-0.224173279118234	0.134808279118234	2.44658875	-0.525985120424387	0.605821675896086	0.999996701290797	-4.78999889032176
GSE133767	10505465	6330416G13Rik	-0.0174837500000002	-0.255314043043514	0.220346543043514	3.358516875	-0.155326499228373	0.878428015520571	0.999996701290797	-4.84225937871224
GSE133767	10599693	6330419J24Rik	0.1211875	-0.165066084929016	0.407441084929017	3.2869625	0.894509648466459	0.383774902884108	0.999996701290797	-4.68555419687266
GSE133767	10500371	6330549D23Rik	0.0366537499999997	-0.163357181013386	0.236664681013386	1.630826875	0.387206660552891	0.703498951988276	0.999996701290797	-4.81606781177377
GSE133767	10500155	6330562C20Rik	-0.0444425000000002	-0.267389756866051	0.178504756866051	2.0960775	-0.421186541294489	0.678995973843374	0.999996701290797	-4.81039063466407
GSE133767	10476868	6430503K07Rik	-0.058643749999999	-0.361828693927206	0.244541193927208	3.796558125	-0.408688333443096	0.687967271589319	0.999996701290797	-4.81253251003072
GSE133767	10568865	6430531B16Rik	-0.107802500000001	-0.311808441464156	0.0962034414641539	2.19689125	-1.11651395037354	0.280027696188127	0.999996701290797	-4.60038933264104
GSE133767	10575993	6430548M08Rik	-0.18306625	-0.397818513425575	0.0316860134255749	2.528476875	-1.80114498321368	0.0897852446194018	0.999996701290797	-4.25792165333832
GSE133767	10488959	6430550D23Rik	-0.0694050000000002	-0.292480981348072	0.153670981348072	2.62187875	-0.657379389333305	0.519905641919649	0.999996701290797	-4.7584395805275
GSE133767	10588582	6430571L13Rik	0.00439749999999917	-0.286816051238249	0.295611051238248	3.1575725	0.0319060032399847	0.974925670868115	0.999996701290797	-4.84710486626802
GSE133767	10571353	6430573F11Rik	-0.0549637499999998	-0.231397634234496	0.121470134234496	2.815585625	-0.658222157213075	0.519377415727339	0.999996701290797	-4.75821619572196
GSE133767	10507236	6430628N08Rik	-0.254805000000001	-0.478437752587039	-0.0311722474129628	4.1341475	-2.40741340118388	0.0279483325098163	0.999996701290797	-3.89480662327578
GSE133767	10481349	6530402F18Rik	-0.0766137500000013	-0.284158401666698	0.130930901666695	3.782600625	-0.779961761029389	0.446340076472787	0.999996701290797	-4.72323106178424
GSE133767	10536743	6530409C15Rik	-0.1096675	-0.300093622577983	0.0807586225779832	2.62723	-1.21682901303143	0.240606386050129	0.999996701290797	-4.55709839636973
GSE133767	10447697	6530411M01Rik	0.0386562499999996	-0.188905583364674	0.266218083364673	1.634720625	0.358920640878988	0.72415719768787	0.999996701290797	-4.82043980050372
GSE133767	10409059	6720427I07Rik	0.32057375	-0.11338518715231	0.754532687152311	2.259616875	1.56083666346662	0.137332850422269	0.999996701290797	-4.38938238855252
GSE133767	10409990	6720489N17Rik	-0.330013750000001	-0.982335937256624	0.322308437256622	1.918665625	-1.06892693849448	0.300327930397982	0.999996701290797	-4.61991911730475
GSE133767	10477107	6820408C15Rik	-0.0778687499999995	-0.290721686922699	0.1349841869227	2.593160625	-0.772968317771589	0.45035621440137	0.999996701290797	-4.72538453437532
GSE133767	10457223	6820431F20Rik	-0.129041249999998	-1.04242345415905	0.784340954159049	4.322156875	-0.298506747744275	0.76900295261448	0.999996701290797	-4.82869145605247
GSE133767	10588079	7420426K07Rik	-0.0203962499999992	-0.291985415383392	0.251192915383394	4.128164375	-0.158677746218033	0.875828023978526	0.999996701290797	-4.84203898114141
GSE133767	10359520	7420461P10Rik	-0.0970237500000006	-0.348828228100372	0.154780728100371	1.870991875	-0.814128098650567	0.427041572458749	0.999996701290797	-4.71246427550886
GSE133767	10476906	8030411F24Rik	0.119582499999999	-0.115032916189786	0.354197916189785	2.990035	1.07693432734714	0.29683887728877	0.999996701290797	-4.61667967158936
GSE133767	10530041	8030423F21Rik	-0.0246825000000004	-0.242120655437704	0.192755655437703	2.0594375	-0.23984547411099	0.813372572062259	0.999996701290797	-4.83527494440036
GSE133767	10405999	8030423J24Rik	-0.00984875000000063	-0.215719408485377	0.196021908485376	2.002191875	-0.101079898492979	0.920692064972392	0.999996701290797	-4.84517464566447
GSE133767	10505481	8030451A03Rik	-0.0575774999999998	-0.270123332211016	0.154968332211016	1.62632125	-0.57237195737232	0.574704056078493	0.999996701290797	-4.77960657654298
GSE133767	10459837	8030462N17Rik	-0.000621249999999574	-0.197780346072086	0.196537846072087	2.117220625	-0.00665775363907722	0.994766896403318	0.999996701290797	-4.84730926682126
GSE133767	10601266	8030474K03Rik	0.24219875	-0.271739622602207	0.756137122602207	3.831873125	0.995724033465633	0.333610110095283	0.999996701290797	-4.64863254105214
GSE133767	10541071	8430408G22Rik	-0.115175	-0.351099293567849	0.120749293567849	2.5452725	-1.03148684804475	0.317037315282309	0.999996701290797	-4.63480975936519
GSE133767	10542340	8430419L09Rik	-0.00695375000000054	-0.305698370192842	0.291790870192841	2.624258125	-0.0491809730428682	0.961359156591732	0.999996701290797	-4.84681083718745
GSE133767	10373751	8430429K09Rik	-0.0707187499999993	-0.304573702213216	0.163136202213217	1.781864375	-0.638948921986699	0.531532690181606	0.999996701290797	-4.76325887717293
GSE133767	10345902	8430432A02Rik	-0.12939125	-0.385930856976566	0.127148356976566	2.007639375	-1.06568443002174	0.301749245612686	0.999996701290797	-4.62122544940417
GSE133767	10362874	9030612E09Rik	-0.0525937499999989	-0.379074663252907	0.273887163252909	2.808945625	-0.340372510817974	0.737824847158103	0.999996701290797	-4.82313108956969
GSE133767	10397763	9030617O03Rik	-0.0189937499999999	-0.264839642002663	0.226852142002663	1.826750625	-0.163239741701382	0.872291056631244	0.999996701290797	-4.84173143399469
GSE133767	10429588	9030619P08Rik	0.130716249999999	-0.148817153024217	0.410249653024216	2.170826875	0.988038814524615	0.337249885949906	0.999996701290797	-4.65155099261673
GSE133767	10399666	9030624G23Rik	0.125815	-0.182095316990677	0.433725316990678	4.66907	0.863348857007524	0.400189462917241	0.999996701290797	-4.69624565370048
GSE133767	10556658	9030624J02Rik	-0.17538875	-0.364663268005025	0.0138857680050253	2.868244375	-1.95788744390313	0.0671865006200884	0.999996701290797	-4.16744947934867
GSE133767	10450948	9130008F23Rik	0.0844737499999995	-0.146178292813782	0.315125792813781	2.631020625	0.773824731891412	0.449863201552632	0.999996701290797	-4.72512174634521
GSE133767	10468131	9130011E15Rik	0.105415	-0.108711395842976	0.319541395842977	2.0337475	1.0401844169529	0.3130973372527	0.999996701290797	-4.6313884813054
GSE133767	10377253	9130017K11Rik	-0.0364262500000003	-0.293288891940046	0.220436391940045	3.000076875	-0.299634389152086	0.768157529147928	0.999996701290797	-4.82855106422035
GSE133767	10568233	9130019O22Rik	-0.15408375	-0.50685233649079	0.19868483649079	4.614929375	-0.922879654673816	0.36922720126005	0.999996701290797	-4.67553994665069
GSE133767	10544858	9130019P16Rik	0.000713750000000068	-0.149622052257629	0.15104955225763	2.072065625	0.0100314067178486	0.992115228155559	0.999996701290797	-4.84729744660241
GSE133767	10568374	9130023H24Rik	-0.26469375	-0.451655319107282	-0.077732180892717	3.653761875	-2.99136549451139	0.00833473405668498	0.999996701290797	-3.53137017730006
GSE133767	10387255	9130213A22Rik	-0.00599499999999953	-0.235404706338292	0.223414706338293	5.02748625	-0.0552148041093003	0.956623279726313	0.999996701290797	-4.84667862984746
GSE133767	10551077	9130221H12Rik	0.0188112500000002	-0.266627082041782	0.304249582041782	2.629416875	0.139246246606238	0.890922929253442	0.999996701290797	-4.84325174273305
GSE133767	10530259	9130230L23Rik	0.0597475000000003	-0.11619434051175	0.23568934051175	2.3924725	0.717511298842543	0.482986656217671	0.999996701290797	-4.74184632793629
GSE133767	10428744	9130401M01Rik	-0.0808749999999985	-0.38534117821575	0.223591178215753	2.930335	-0.561246150314946	0.582091980478283	0.999996701290797	-4.78217450970705
GSE133767	10352344	9130409I23Rik	0.0664762499999996	-0.193279027084832	0.326231527084832	3.450924375	0.540729757551726	0.595841383057315	0.999996701290797	-4.78678537524656
GSE133767	10375807	9230009I02Rik	-0.0617687500000001	-0.331916787167536	0.208379287167536	2.573981875	-0.48310900599275	0.63529817948467	0.999996701290797	-4.79886351673544
GSE133767	10367702	9230019H11Rik	-0.0523549999999999	-0.347186586142089	0.242476586142089	1.80489625	-0.375199535730075	0.712240130351758	0.999996701290797	-4.81796308529655
GSE133767	10378030	9230020A06Rik	-0.0119674999999999	-0.283787339258295	0.259852339258295	2.55277625	-0.0930251592366969	0.926991736580713	0.999996701290797	-4.84550258088722
GSE133767	10488409	9230104L09Rik	0.0757537499999996	-0.205518406686141	0.35702590668614	2.039233125	0.569056686106581	0.576900440243247	0.999996701290797	-4.78037672044793
GSE133767	10398934	9230104M06Rik	-0.0623187500000002	-0.344320617214931	0.21968311721493	2.463485625	-0.466922591155175	0.646596026509164	0.999996701290797	-4.80202296496358
GSE133767	10361914	9230106D20Rik	-0.0561662499999995	-0.318870275572127	0.206537775572128	1.799799375	-0.451738221991026	0.657276039158739	0.999996701290797	-4.80489295265852
GSE133767	10427890	9230109A22Rik	-0.0884399999999999	-0.262342977597479	0.0854629775974797	1.65631625	-1.07453323598738	0.297881983393855	0.999996701290797	-4.61765305644814
GSE133767	10590821	9230110C19Rik	-0.114272500000001	-0.378429678568652	0.14988467856865	2.1391875	-0.914023682968144	0.37372773906959	0.999996701290797	-4.67869441502631
GSE133767	10592182	9230110F15Rik	0.2338775	-0.117659521717165	0.585414521717164	1.5037725	1.40570927751894	0.178163399585362	0.999996701290797	-4.4684071193056
GSE133767	10418946	9230112D13Rik	-0.0722937499999996	-0.329850511510288	0.185263011510289	1.683268125	-0.593069970469023	0.561089987910461	0.999996701290797	-4.7747037047254
GSE133767	10479510	9230112E08Rik	0.0652062499999997	-0.196046531882722	0.326459031882722	2.892953125	0.527359092550532	0.604888219737923	0.999996701290797	-4.78970299367813
GSE133767	10584244	9230113P08Rik	-0.2418925	-0.443328251062602	-0.0404567489373983	1.29153375	-2.5372542470729	0.0214739780888431	0.999996701290797	-3.81405268141255
GSE133767	10426603	9330020H09Rik	-0.18236375	-0.442038535007026	0.0773110350070255	4.217715625	-1.48383930459989	0.156501181350245	0.999996701290797	-4.42924627387133
GSE133767	10460123	9330132A10Rik	0.13262875	-0.118638872835354	0.383896372835354	1.387571875	1.11526810630764	0.280545884276983	0.999996701290797	-4.60090908095601
GSE133767	10396076	9330151L19Rik	0.2218625	-0.0641136835224341	0.507838683522435	2.26413375	1.63920086159186	0.119892873181957	0.999996701290797	-4.34761647699021
GSE133767	10595443	9330154J02Rik	-0.0289487499999996	-0.318409444306711	0.260511944306712	2.258818125	-0.211309174553671	0.835206097932346	0.999996701290797	-4.83796453505396
GSE133767	10428728	9330154K18Rik	0.0715499999999998	-0.236147572598923	0.379247572598923	2.1714125	0.491319165136795	0.629602641699024	0.999996701290797	-4.79722163647961
GSE133767	10543952	9330158H04Rik	0.0395712500000007	-0.213665547738028	0.29280804773803	1.658021875	0.330165046037383	0.745385620440476	0.999996701290797	-4.82455261018595
GSE133767	10362372	9330159F19Rik	0.0445499999999999	-0.15675876811571	0.245858768115709	1.88485375	0.467587781794685	0.646129951514591	0.999996701290797	-4.80189515716195
GSE133767	10523277	9330159N05Rik	0.142661250000001	-0.133310620271595	0.418633120271596	2.907995625	1.0922431895553	0.29025094987083	0.999996701290797	-4.61043336874222
GSE133767	10387251	9330160F10Rik	-0.00172624999999904	-0.261088253800117	0.257635753800119	3.122581875	-0.014062919023181	0.988946614527558	0.999996701290797	-4.84727705411643
GSE133767	10402334	9330161L09Rik	-0.00592499999999951	-0.173171083012104	0.161321083012105	2.36755375	-0.074853228519403	0.941221853031793	0.999996701290797	-4.84614259844647
GSE133767	10554349	9330171B17Rik	0.0969687500000007	-0.151628789187763	0.345566289187765	3.247550625	0.824162992009493	0.421475714987465	0.999996701290797	-4.7092250192487
GSE133767	10580752	9330175E14Rik	0.11368125	-0.0736428619821158	0.301005361982116	2.977666875	1.28225173411608	0.217288761364074	0.999996701290797	-4.52739347074784
GSE133767	10519612	9330182L06Rik	0.0275450000000004	-0.188561271706591	0.243651271706592	2.19049375	0.269310659281511	0.790993567324318	0.999996701290797	-4.83214495442074
GSE133767	10573731	9430002A10Rik	0.0388837499999997	-0.168331694861164	0.246099194861164	1.859980625	0.396482622151861	0.696775160942885	0.999996701290797	-4.81456394634138
GSE133767	10510120	9430007A20Rik	-0.0848762500000002	-0.37855032877298	0.20879782877298	2.127535625	-0.610658920296432	0.549656236442181	0.999996701290797	-4.77040961891918
GSE133767	10489239	9430008C03Rik	-0.0193274999999993	-0.228964258247006	0.190309258247007	5.50927375	-0.194798847858808	0.847903284599627	0.999996701290797	-4.83936660000658
GSE133767	10511298	9430015G10Rik	0.0303762500000007	-0.197294224166769	0.258046724166771	3.221914375	0.281906820671321	0.781482554335455	0.999996701290797	-4.83069789159754
GSE133767	10346340	9430016H08Rik	0.0846274999999994	-0.211599281277066	0.380854281277065	2.10083875	0.603622374020099	0.554215287886704	0.999996701290797	-4.77214151586559
GSE133767	10453629	9430020K01Rik	-0.130799999999999	-0.362980119588283	0.101380119588284	3.5395975	-1.19031210631127	0.250588945897888	0.999996701290797	-4.56881355099141
GSE133767	10478285	9430021M05Rik	-0.0488612500000003	-0.283826229924001	0.186103729924	2.345970625	-0.439379279392716	0.666025693428295	0.999996701290797	-4.8071615643505
GSE133767	10511321	9430025C20Rik	-0.05635875	-0.277475763171938	0.164758263171938	1.957568125	-0.538539211474132	0.597318926842006	0.999996701290797	-4.78726810595772
GSE133767	10595622	9430037G07Rik	0.20881	-0.251925778284218	0.669545778284217	5.51416625	0.957585347486673	0.351946171933413	0.999996701290797	-4.66293212679141
GSE133767	10568758	9430038I01Rik	0.22507875	-0.0448764857485919	0.495033985748592	3.145879375	1.76165506522392	0.0964430289228495	0.999996701290797	-4.28018019147432
GSE133767	10559498	9430041J12Rik	0.109856250000001	-0.139427910761826	0.359140410761828	2.257475625	0.931125504394703	0.36506993391833	0.999996701290797	-4.67257976389379
GSE133767	10428070	9430069I07Rik	0.0446962500000008	-0.278522706698231	0.367915206698233	2.231323125	0.292181288979396	0.773750855260505	0.999996701290797	-4.82946932967212
GSE133767	10481649	9430097D07Rik	-0.0647025000000001	-0.315009323335379	0.185604323335378	2.98174125	-0.546168325570511	0.59218090565037	0.999996701290797	-4.78557887891826
GSE133767	10507777	9530002B09Rik	-0.0309349999999995	-0.292511687891343	0.230641687891344	2.67493	-0.249878690430631	0.805732489845343	0.999996701290797	-4.83424932925085
GSE133767	10372639	9530003J23Rik	0.0434562499999998	-0.206422764650002	0.293335264650002	2.093091875	0.36745198623728	0.717902432577203	0.999996701290797	-4.81915516393911
GSE133767	10551435	9530053A07Rik	0.00441374999999988	-0.18935562630865	0.19818312630865	2.746466875	0.0481283226910562	0.96218552614133	0.999996701290797	-4.84683233692937
GSE133767	10535467	9530056K15Rik	-0.00523000000000007	-0.260939228273143	0.250479228273142	2.150865	-0.0432148912657417	0.966043323214861	0.999996701290797	-4.84692654052357
GSE133767	10375951	9530068E07Rik	0.0311462499999995	-0.25428509000766	0.316577590007659	3.650446875	0.230559088264402	0.820461303171763	0.999996701290797	-4.83618717406988
GSE133767	10583834	9530077C05Rik	-0.0395962500000002	-0.256259883672687	0.177067383672687	1.713849375	-0.386141227151714	0.704272880921746	0.999996701290797	-4.81623833165122
GSE133767	10514475	9530080O11Rik	-0.0782224999999999	-0.399390355642021	0.242945355642021	3.00114125	-0.51460945007586	0.613577049042241	0.999996701290797	-4.79242061039225
GSE133767	10515086	9630013D21Rik	0.00623249999999986	-0.18202486500761	0.19448986500761	2.150925	0.0699501175668548	0.945065114562281	0.999996701290797	-4.84629157737189
GSE133767	10360909	9630028B13Rik	-0.0945062499999989	-0.317971584827941	0.128959084827944	3.121838125	-0.893569847248594	0.384263296847611	0.999996701290797	-4.68588138736652
GSE133767	10548097	9630033F20Rik	0.0977224999999997	-0.0998824653891492	0.295327465389149	2.413755	1.04490029750234	0.310975826079573	0.999996701290797	-4.62952379889873
GSE133767	10588195	9630041A04Rik	0.0106612500000001	-0.223417783857278	0.244740283857278	2.474103125	0.0962329387460769	0.924482284947592	0.999996701290797	-4.8453752368349
GSE133767	10451641	9830107B12Rik	-0.13152375	-0.381342360740474	0.118294860740473	1.781479375	-1.11239116615264	0.28174521556249	0.999996701290797	-4.60210757996114
GSE133767	10552363	9830147E19Rik	0.05915625	-0.358782797962853	0.477095297962853	2.600076875	0.299065161076965	0.768584257363929	0.999996701290797	-4.8286219983857
GSE133767	10421250	9930012K11Rik	-0.0374350000000003	-0.270352723002485	0.195482723002484	2.53356	-0.339588863029491	0.738404334031038	0.999996701290797	-4.82324172297732
GSE133767	10424392	9930014A18Rik	-0.13801	-0.332725402257957	0.0567054022579576	2.0500425	-1.49757432921091	0.152927539432122	0.999996701290797	-4.4222248382412
GSE133767	10466970	9930021J03Rik	-0.16343875	-0.470344908642941	0.143467408642941	3.198925625	-1.12519441001284	0.27643690581673	0.999996701290797	-4.59675551634944
GSE133767	10382254	9930022D16Rik	-0.0737387499999995	-0.321055997278373	0.173578497278374	3.107790625	-0.629969472377426	0.537249238286731	0.999996701290797	-4.76556104626672
GSE133767	10399376	9930038B18Rik	0.152995	-0.0881243775848048	0.394114377584805	2.643565	1.34067422913866	0.198000099733326	0.999996701290797	-4.49994103404432
GSE133767	10508001	9930104L06Rik	-0.0910899999999999	-0.303580770260203	0.121400770260203	2.0545075	-0.905750888099737	0.377965266751004	0.999996701290797	-4.68161789943679
GSE133767	10385513	9930111J21Rik1	-0.0588562499999989	-0.253828963808562	0.136116463808564	2.513728125	-0.637818171816758	0.532250697986585	0.999996701290797	-4.76355043759187
GSE133767	10385513	9930111J21Rik2	-0.0588562499999989	-0.253828963808562	0.136116463808564	2.513728125	-0.637818171816758	0.532250697986585	0.999996701290797	-4.76355043759187
GSE133767	10477595	a	-0.0451275	-0.255025005318078	0.164770005318078	2.875655	-0.454267989895493	0.655491314703171	0.999996701290797	-4.80442112789316
GSE133767	10480421	A130006I12Rik	0.24339375	0.0392030970068046	0.447584402993195	2.540648125	2.51855651860961	0.0223097006567528	0.999996701290797	-3.82570579112154
GSE133767	10352827	A130010J15Rik	0.19755875	-0.0363771275009609	0.431494627500961	2.601926875	1.7843398489927	0.0925675839385619	0.999996701290797	-4.26742245130658
GSE133767	10568691	A130023I24Rik	-0.0306225000000002	-0.313369282127894	0.252124282127894	1.85531	-0.228834293729931	0.821779705158776	0.999996701290797	-4.83635268073758
GSE133767	10431845	A130051J06Rik	-0.1472	-0.512982321137462	0.218582321137463	2.90154	-0.850282490215441	0.407207734738812	0.999996701290797	-4.70063164527546
GSE133767	10594998	A130057D12Rik	0.0423449999999992	-0.20207487957527	0.286764879575268	3.27727625	0.366052813050039	0.71892683764184	0.999996701290797	-4.81936786540439
GSE133767	10428921	A1bg	0.029094999999999	-0.282540536928217	0.340730536928215	2.54265	0.197264766519426	0.846004048622966	0.999996701290797	-4.83916437924717
GSE133767	10462484	A1cf	-0.10470375	-0.378471415880636	0.169063915880636	1.437026875	-0.808087186505463	0.430414621200348	0.999996701290797	-4.71439750036444
GSE133767	10352703	A230020J21Rik	-0.0186900000000003	-0.24871661986841	0.21133661986841	3.71245375	-0.171675903194693	0.865757800561323	0.999996701290797	-4.84113986817612
GSE133767	10365302	A230046K03Rik	0.118809999999999	-0.139558370038854	0.377178370038853	1.61472875	0.971609578836983	0.345124087252725	0.999996701290797	-4.65772754367871
GSE133767	10583485	A230050P20Rik	0.22479	-0.0591267524156152	0.508706752415616	3.67804375	1.6728773686521	0.113000045950947	0.999996701290797	-4.32932290151271
GSE133767	10572514	A230052G05Rik	0.0461487499999982	-0.197037617435049	0.289335117435045	3.349791875	0.400957972992008	0.693540387276948	0.999996701290797	-4.81382603014785
GSE133767	10553635	A230056P14Rik	-0.0640224999999999	-0.251263771752879	0.123218771752879	1.75703625	-0.722452309683469	0.480023494062859	0.999996701290797	-4.7404243413199
GSE133767	10371464	A230060F14Rik	0.042930000000001	-0.185498173009502	0.271358173009504	4.86322625	0.397090374165806	0.696335523907533	0.999996701290797	-4.81446420876145
GSE133767	10565461	A230065N10Rik	0.0396762500000012	-0.137170874675998	0.216523374676001	3.971681875	0.474035375047606	0.641620238948176	0.999996701290797	-4.80064730340366
GSE133767	10607330	A230072E10Rik	-0.0426912499999998	-0.290230099250781	0.204847599250782	6.831874375	-0.36439603328689	0.720140562892873	0.999996701290797	-4.81961870553347
GSE133767	10570178	A230072I06Rik	0.0157024999999997	-0.26780851424153	0.299213514241529	2.01962125	0.117024556439768	0.90823805591118	0.999996701290797	-4.84444539928981
GSE133767	10541738	A230083G16Rik	0.148318749999999	-0.188743096159271	0.485380596159269	2.731604375	0.929746599780794	0.365762898607148	0.999996701290797	-4.67307632010508
GSE133767	10541354	A2m	0.1334175	-0.103794239100395	0.370629239100395	2.054055	1.1883784240516	0.25132908383206	0.999996701290797	-4.56966034463762
GSE133767	10574423	A330008L17Rik	-0.1288725	-0.36149094280817	0.103745942808171	3.22425625	-1.17056152861517	0.258227175315328	0.999996701290797	-4.57741410885773
GSE133767	10451493	A330017A19Rik	-0.0381125000000004	-0.28009816713654	0.203873167136539	3.645915	-0.332779014478633	0.743446838034789	0.999996701290797	-4.82419261598868
GSE133767	10352914	A330023F24Rik	0.0636112499999992	-0.230207009682545	0.357429509682544	2.845693125	0.457439101567354	0.653257161263195	0.999996701290797	-4.80382611187376
GSE133767	10587610	A330041J22Rik	-0.1079775	-0.279348664187584	0.0633936641875843	2.70824375	-1.33129302995215	0.201002099945	0.999996701290797	-4.50440624527545
GSE133767	10534148	A330070K13Rik	0.152913749999999	-0.148274211345253	0.454101711345251	2.702120625	1.07272170316623	0.298670735498597	0.999996701290797	-4.61838630209966
GSE133767	10508368	A3galt2	-0.11049125	-0.299729292076787	0.0787467920767862	2.136503125	-1.23366594990811	0.234428433744176	0.999996701290797	-4.54956139040985
GSE133767	10510809	A430005L14Rik	0.13561625	-0.161959914587032	0.433192414587032	4.210985625	0.962923368983506	0.349338570882616	0.999996701290797	-4.66095851252742
GSE133767	10526848	A430033K04Rik	-0.161526250000001	-0.383365544721046	0.0603130447210435	4.098061875	-1.53844782449738	0.142692040783242	0.999996701290797	-4.4010980824288
GSE133767	10413148	A430057M04Rik	-0.1731675	-0.459025928504998	0.112690928504997	2.82968375	-1.27995152618005	0.218077436782019	0.999996701290797	-4.52845676012093
GSE133767	10569719	A430078G23Rik	0.0924137499999995	-0.142740144258127	0.327567644258126	3.683411875	0.830352610903384	0.418065910860707	0.999996701290797	-4.70720972843038
GSE133767	10461553	A430093F15Rik	-0.0524487500000004	-0.295325020411784	0.190427520411783	2.766824375	-0.456276597374601	0.65407579141546	0.999996701290797	-4.80404470153511
GSE133767	10486154	A430105I19Rik	-0.0796449999999997	-0.34325175364354	0.18396175364354	3.46382125	-0.638381247525031	0.531893087118549	0.999996701290797	-4.76340530986647
GSE133767	10350341	A430106G13Rik	-0.0219512500000001	-0.262513498940317	0.218610998940317	1.386179375	-0.192801282279795	0.8494425058651	0.999996701290797	-4.83952856146977
GSE133767	10352354	A430110L20Rik	-0.03774875	-0.323903660882497	0.248406160882497	1.701976875	-0.27872730065257	0.783880023510257	0.999996701290797	-4.83106930702622
GSE133767	10430968	A4galt	-0.0926537499999998	-0.368201385874628	0.182893885874628	2.932359375	-0.71046788152983	0.48722934753155	0.999996701290797	-4.74385811908153
GSE133767	10588132	A4gnt	0.118557500000001	-0.072373082590204	0.309488082590206	2.36088875	1.31199346662992	0.207291891966449	0.999996701290797	-4.51352430434356
GSE133767	10476882	A530006G24Rik	0.0732599999999999	-0.199610500633546	0.346130500633546	2.65161375	0.567268233174246	0.578087091228298	0.999996701290797	-4.78079043762809
GSE133767	10478892	A530013C23Rik	0.0191100000000004	-0.186366834082698	0.224586834082698	4.316215	0.196506064824056	0.846588292699373	0.999996701290797	-4.83922686645611
GSE133767	10398824	A530016L24Rik	-0.22326875	-0.463053637625072	0.0165161376250711	3.120824375	-1.96736196016681	0.0659998177050683	0.999996701290797	-4.16188282151905
GSE133767	10386821	A530017D24Rik	-0.1091075	-0.302449949058957	0.0842349490589563	2.40954	-1.19235486107444	0.24980886500669	0.999996701290797	-4.5679178774759
GSE133767	10554658	A530021J07Rik	-0.106145	-0.277853806751328	0.0655638067513284	1.61055125	-1.30612610148144	0.20923470063635	0.999996701290797	-4.5162780045689
GSE133767	10356271	A530032D15Rik	-0.0293712499999996	-0.207252982116272	0.148510482116273	6.407918125	-0.348874492253552	0.731548380977274	0.999996701290797	-4.82191478174888
GSE133767	10347919	A530040E14Rik	-0.0800737500000004	-0.325621283234415	0.165473783234414	2.213360625	-0.689021429832616	0.500282351187866	0.999996701290797	-4.74987288475916
GSE133767	10545079	A530053G22Rik	-0.0726750000000007	-0.295145160113291	0.14979516011329	1.55406875	-0.690226152105509	0.499543782001319	0.999996701290797	-4.74953945804458
GSE133767	10410355	A530054K11Rik	-0.10791	-0.530227907595794	0.314407907595794	2.86368875	-0.539883845395869	0.596411743030456	0.999996701290797	-4.78697200836298
GSE133767	10451646	A530064D06Rik	-0.0240549999999997	-0.239118721856422	0.191008721856423	4.42582625	-0.23632863205472	0.816055214331006	0.999996701290797	-4.83562460644828
GSE133767	10408523	A530084C06Rik	-0.0594837499999992	-0.311614118521054	0.192646618521056	4.057334375	-0.498484109243203	0.6246517525718	0.999996701290797	-4.79576721431927
GSE133767	10410449	A530095I07Rik	-0.0143924999999996	-0.305117144827102	0.276332144827103	3.61975875	-0.104600202853192	0.917940488932385	0.999996701290797	-4.84502279227794
GSE133767	10407982	A530099J19Rik	0.12527875	-0.123733352959653	0.374290852959654	2.043884375	1.06300447474641	0.302927657336249	0.999996701290797	-4.62230276419682
GSE133767	10356293	A630001G21Rik	-0.135156249999999	-0.383784933457197	0.1134724334572	4.692030625	-1.148584735944	0.266932045669718	0.999996701290797	-4.58685627693559
GSE133767	10433773	A630010A05Rik	0.05802	-0.141891085989481	0.257931085989481	1.24279125	0.613223773570772	0.54799947394542	0.999996701290797	-4.76977369363505
GSE133767	10599598	A630012P03Rik	0.0779887500000003	-0.159739301756364	0.315716801756364	2.257814375	0.693153891170962	0.497751534849534	0.999996701290797	-4.74872694812326
GSE133767	10524229	A630023P12Rik	0.17620375	-0.185835023895071	0.538242523895071	2.239623125	1.02834347976635	0.318469954106527	0.999996701290797	-4.63604054202522
GSE133767	10601421	A630033H20Rik	-0.0772825000000004	-0.322593719696343	0.168028719696343	1.5351575	-0.665643795100113	0.514738804650578	0.999996701290797	-4.75623766981906
GSE133767	10384808	A630052C17Rik	-0.275178750000002	-0.498492934858979	-0.051864565141024	3.965160625	-2.60361473404536	0.0187417053823466	0.999996701290797	-3.77265561386435
GSE133767	10397780	A630072L19Rik	0.0771562499999998	-0.313632575748759	0.467945075748758	3.340051875	0.417164277450681	0.681877847805117	0.999996701290797	-4.81108675656192
GSE133767	10565735	A630091E08Rik	-0.11500625	-0.317020585386601	0.0870080853866013	2.662279375	-1.20286639198674	0.245824024977462	0.999996701290797	-4.56329090391041
GSE133767	10592196	A630095E13Rik	-0.0599912499999999	-0.236595920166159	0.11661342016616	1.626879375	-0.717734569569636	0.482852525375681	0.999996701290797	-4.74178226239678
GSE133767	10361184	A730013G03Rik	-0.136315	-0.403771291352867	0.131141291352867	2.9587275	-1.07688410548117	0.29686066783181	0.999996701290797	-4.61670004873283
GSE133767	10515049	A730015C16Rik	-0.00529249999999903	-0.288549615738025	0.277964615738027	3.75977375	-0.0394782756694299	0.968977725897566	0.999996701290797	-4.84699139950928
GSE133767	10455942	A730017C20Rik	-0.1780375	-0.426677492850497	0.070602492850497	2.000645	-1.51292932175018	0.149012898474994	0.999996701290797	-4.4143284404887
GSE133767	10402757	A730018C14Rik	0.21811375	-0.0598594022326281	0.496086902232627	2.502791875	1.65789999338227	0.116022405113937	0.999996701290797	-4.33748348023747
GSE133767	10501827	A730020M07Rik	-0.0299912500000006	-0.282249458460687	0.222266958460686	2.202251875	-0.251204489753511	0.804724416396702	0.999996701290797	-4.83411069701322
GSE133767	10476005	A730036I17Rik	0.000408749999999847	-0.213114479414863	0.213931979414862	1.725658125	0.0040447415245519	0.996820751091471	0.999996701290797	-4.84731513791252
GSE133767	10570972	A730045E13Rik	-0.0787787500000008	-0.27682773107193	0.119270231071928	1.569053125	-0.840455280897006	0.412538674240828	0.999996701290797	-4.7038921692315
GSE133767	10540207	A730049H05Rik	0.147069999999999	-0.0478148905113936	0.341954890511392	2.54639875	1.59449829890764	0.129594893433607	0.999996701290797	-4.37158340882229
GSE133767	10420021	A730061H03Rik	-0.102458750000001	-0.362205848475524	0.157288348475523	3.239048125	-0.833444117181196	0.416369489019634	0.999996701290797	-4.70619823516992
GSE133767	10374115	A730071L15Rik	-0.138425000000001	-0.461156305847908	0.184306305847907	2.23523	-0.906257417538224	0.377704884358662	0.999996701290797	-4.68143954700703
GSE133767	10404979	A830005F24Rik	-0.168293749999999	-0.444634981124606	0.108047481124608	2.287121875	-1.28676854743	0.215746593982204	0.999996701290797	-4.52530160720226
GSE133767	10523865	A830010M20Rik	0.0342687499999998	-0.164206554833475	0.232744054833475	2.080874375	0.364812678247577	0.719835264080037	0.999996701290797	-4.81955572893425
GSE133767	10344879	A830018L16Rik	0.0487774999999993	-0.181199856121791	0.27875485612179	2.0145375	0.448138852680335	0.659819037154698	0.999996701290797	-4.80555990188126
GSE133767	10467175	A830019P07Rik	0.18352875	-0.0565706302783013	0.423628130278301	1.935541875	1.61506945952972	0.125050381453388	0.999996701290797	-4.36060014422002
GSE133767	10384762	A830031A19Rik	-0.14982625	-0.410614512660911	0.110962012660911	3.308848125	-1.21388628840935	0.241698903244626	0.999996701290797	-4.55840789479833
GSE133767	10418092	A830039N20Rik	0.0226150000000003	-0.201628250373583	0.246858250373584	1.8818925	0.213086212213422	0.833842200513587	0.999996701290797	-4.83780688911938
GSE133767	10564618	A830073O21Rik	-0.0874212500000002	-0.257576390727723	0.0827338907277224	5.239199375	-1.08555060749121	0.293117674026614	0.999996701290797	-4.6131725975021
GSE133767	10602827	A830080D01Rik	0.0822725000000002	-0.198323554882817	0.362868554882818	1.7881425	0.619514207953893	0.543947618521273	0.999996701290797	-4.76820357653703
GSE133767	10491066	A830092H15Rik	-0.00776249999999923	-0.221558917328438	0.20603391732844	4.0541575	-0.0767148300312913	0.939763038743776	0.999996701290797	-4.84608339483222
GSE133767	10452440	A930002H24Rik	-0.017428750000001	-0.251798151578825	0.216940651578823	3.104705625	-0.157124340022494	0.877033020070546	0.999996701290797	-4.84214172435857
GSE133767	10495190	A930002I21Rik	0.117325	-0.141221873074001	0.375871873074001	2.5585475	0.958803057924932	0.351350143511928	0.999996701290797	-4.66248270808923
GSE133767	10438442	A930003A15Rik	-0.0102000000000002	-0.236378408584374	0.215978408584373	2.400535	-0.0952855763075517	0.92522332411103	0.999996701290797	-4.84541329411352
GSE133767	10480321	A930004D18Rik	-0.0120724999999999	-0.288645074314247	0.264500074314247	2.6167525	-0.0922287323039301	0.927614906794584	0.999996701290797	-4.84553353003628
GSE133767	10501591	A930005H10Rik	0.0133487500000005	-0.183278294681187	0.209975794681187	4.852024375	0.143441720268719	0.887659906011553	0.999996701290797	-4.84300323039579
GSE133767	10531627	A930011G23Rik	0.091425000000001	-0.141984540420589	0.324834540420591	4.64668875	0.827607662114869	0.419575884117098	0.999996701290797	-4.70810508599508
GSE133767	10415909	A930011O12Rik	-0.00482000000000005	-0.264492216876389	0.254852216876389	1.719415	-0.039219286627603	0.969181130158237	0.999996701290797	-4.84699567781338
GSE133767	10482788	A930012O16Rik	0.0589462500000009	-0.209907683633608	0.32780018363361	4.574333125	0.463252662289163	0.649170131736649	0.999996701290797	-4.80272495810563
GSE133767	10560505	A930016O22Rik	-0.166169999999999	-0.452031121508564	0.119691121508565	4.5669275	-1.22821858274281	0.236413673019616	0.999996701290797	-4.55200817598267
GSE133767	10449177	A930017K11Rik	0.11576	-0.133218994431237	0.364738994431237	2.82648	0.982367411012689	0.339953717978033	0.999996701290797	-4.65369278954103
GSE133767	10424060	A930017M01Rik	-0.00764874999999976	-0.20177164305526	0.18647414305526	1.728285625	-0.0832514580493842	0.93464249811046	0.999996701290797	-4.8458640091232
GSE133767	10419525	A930018M24Rik	8.25000000004295e-05	-0.201629538890111	0.201794538890112	2.309295	0.000864172151121122	0.999320741281128	0.999996701290797	-4.84731841572079
GSE133767	10474234	A930018P22Rik	0.0254150000000002	-0.218058409014534	0.268888409014534	2.3532025	0.220554901976005	0.828115910808445	0.999996701290797	-4.83713001611858
GSE133767	10525460	A930024E05Rik	-0.0458599999999998	-0.247442300406966	0.155722300406966	2.421875	-0.480684137483743	0.636984894975319	0.999996701290797	-4.79934338868417
GSE133767	10544499	A930035D04Rik	-0.0218049999999996	-0.228151325882123	0.184541325882123	4.178545	-0.223273658085408	0.826033880106207	0.999996701290797	-4.83687788571142
GSE133767	10486096	A930104D05Rik	-0.0652574999999995	-0.345513961581095	0.214998961581096	2.1553825	-0.491986215504785	0.629140944922241	0.999996701290797	-4.7970870787808
GSE133767	10571737	AA386476	0.0126237499999995	-0.236630121523157	0.261877621523156	5.535914375	0.107010060545237	0.916057488027594	0.999996701290797	-4.84491584878495
GSE133767	10598674	AA414768	-0.10910125	-0.352299555141988	0.134097055141987	2.477668125	-0.947866816968163	0.35672810842138	0.999996701290797	-4.66650188124759
GSE133767	10515930	AA415398	0.123646250000001	-0.0977076973012228	0.345000197301224	2.264955625	1.18024403923064	0.254460847258748	0.999996701290797	-4.57321125892858
GSE133767	10475517	AA467197	0.50069625	-0.118451077058919	1.11984357705892	3.826860625	1.70867109875218	0.106050237322316	0.999996701290797	-4.30966479987644
GSE133767	10566875	AA474408	0.0470262500000005	-0.230325815276461	0.324378315276462	3.066671875	0.358250727849158	0.72464920486371	0.999996701290797	-4.82053942890048
GSE133767	10536010	AA792892	0.05479875	-0.131883411493457	0.241480911493457	1.906890625	0.620220288360345	0.543493828672855	0.999996701290797	-4.76802640795045
GSE133767	10349562	AA986860	-0.0689124999999993	-0.256637506864194	0.118812506864196	2.99714625	-0.775628955921316	0.448825655747351	0.999996701290797	-4.7245672800729
GSE133767	10410351	AA987161	0.257515	-0.0226153936420839	0.537645393642084	1.85751875	1.94231845685456	0.0691781664824726	0.999996701290797	-4.17657444595388
GSE133767	10432986	Aaas	0.157879999999998	-0.0890459283762166	0.404805928376213	3.6031875	1.35094777294393	0.194753735883742	0.999996701290797	-4.49502654594387
GSE133767	10525893	Aacs	0.0351625000000007	-0.170866526138156	0.241191526138157	3.03780375	0.360603113968444	0.722922080621878	0.999996701290797	-4.82018878533814
GSE133767	10492300	Aadac	-0.00735500000000044	-0.268287335931157	0.253577335931156	2.09290125	-0.0595570135407869	0.953216158965355	0.999996701290797	-4.84657403700605
GSE133767	10492294	Aadacl2	-0.142385000000001	-0.404564204317493	0.119794204317492	1.7674075	-1.14747738690491	0.267376426959462	0.999996701290797	-4.58732844136422
GSE133767	10571891	Aadat	-0.00561500000000015	-0.240336049004999	0.229106049004998	2.18425125	-0.0505447276089945	0.960288626260132	0.999996701290797	-4.84678229198591
GSE133767	10410115	Aaed1	0.17601	-0.0793153043579662	0.431335304357966	2.27863625	1.45653733725043	0.163809988802343	0.999996701290797	-4.44308352748091
GSE133767	10586130	Aagab	-0.1172325	-0.52209551978904	0.28763051978904	2.07313375	-0.611812088350279	0.548911016020932	0.999996701290797	-4.77012401091508
GSE133767	10539741	Aak1	-0.0788925000000007	-0.291371983992558	0.133586983992557	2.3003225	-0.784507053645937	0.443741817169433	0.999996701290797	-4.72182222341747
GSE133767	10565612	Aamdc	0.106037499999999	-0.477043515120932	0.689118515120931	3.10252625	0.384245434533887	0.705650808136395	0.999996701290797	-4.81654061952147
GSE133767	10355554	Aamp	0.19431	-0.112479288382986	0.501099288382986	2.70777375	1.33823719648071	0.198776492523743	0.999996701290797	-4.50110306392779
GSE133767	10382816	Aanat	-0.0297774999999985	-0.21740028611048	0.157845286110483	2.984905	-0.33533647117077	0.741551688203096	0.999996701290797	-4.82383771545762
GSE133767	10477887	Aar2	0.0882600000000004	-0.184223556750048	0.360743556750049	2.7096	0.684387014745355	0.50312942245969	0.999996701290797	-4.75115058657526
GSE133767	10424082	Aard	0.122733750000001	-0.0799654821864003	0.325432982186401	3.153454375	1.27935195606207	0.218283380813607	0.999996701290797	-4.52873369376669
GSE133767	10575550	Aars	0.0448137500000008	-0.145333733527532	0.234961233527534	3.629514375	0.497965026533148	0.625009815324924	0.999996701290797	-4.795873258028
GSE133767	10445380	Aars2	-0.0886225	-0.301559114356061	0.124314114356061	3.06566875	-0.879370292264762	0.391692975429289	0.999996701290797	-4.69078917511719
GSE133767	10391431	Aarsd1	0.0619612499999995	-0.0831487299184579	0.207071229918457	2.560496875	0.902196267105536	0.37979592189402	0.999996701290797	-4.68286712368392
GSE133767	10530787	Aasdh	0.0606149999999999	-0.138984920179332	0.260214920179332	2.3468375	0.641649534429564	0.529820017410341	0.999996701290797	-4.76256060425089
GSE133767	10590654	Aasdhppt	-0.1267875	-0.43282780223219	0.17925280223219	2.15329375	-0.875338345041677	0.393819872012677	0.999996701290797	-4.69217046355468
GSE133767	10543333	Aass	0.108285	-0.0662256379162039	0.282795637916203	1.74208	1.31106593096065	0.207598064552028	0.999996701290797	-4.5139601919107
GSE133767	10389269	Aatf	-0.14081625	-0.688798365151448	0.407165865151447	2.959785625	-0.542955863558054	0.594341720380307	0.999996701290797	-4.7862929121032
GSE133767	10393668	Aatk	0.00807749999999885	-0.212380643740522	0.22853564374052	4.63773	0.0774156844110995	0.939213882311253	0.999996701290797	-4.84606072950022
GSE133767	10509557	AB041806	-0.0641675000000004	-0.318817169600766	0.190482169600765	3.14100875	-0.532414824609888	0.601459509226944	0.999996701290797	-4.78860790574567
GSE133767	10583669	AB124611	-0.00735625000000084	-0.243952798806413	0.229240298806412	3.219281875	-0.0656940765315168	0.948402311970129	0.999996701290797	-4.84641272318401
GSE133767	10433445	Abat	-0.0580762500000005	-0.276018345735411	0.15986584573541	3.602385625	-0.563035243464589	0.580900695659989	0.999996701290797	-4.78176476707275
GSE133767	10512949	Abca1	-0.0375299999999998	-0.243122707077535	0.168062707077536	2.2783075	-0.385699429656675	0.704593900013839	0.999996701290797	-4.81630890631861
GSE133767	10355343	Abca12	-0.0347949999999999	-0.275808771420612	0.206218771420612	2.303055	-0.305037420271754	0.764110925050457	0.999996701290797	-4.82787116830775
GSE133767	10374248	Abca13	-0.06523375	-0.307816128432894	0.177348628432894	2.204561875	-0.56818692071769	0.577477379029352	0.999996701290797	-4.78057807326418
GSE133767	10556833	Abca14	-0.0737175000000003	-0.318688691365035	0.171253691365034	2.086185	-0.635819321725926	0.533521245917869	0.999996701290797	-4.76406466816063
GSE133767	10556867	Abca15	-0.100720000000001	-0.345882291367	0.144442291366999	1.85440625	-0.868040888076924	0.397688735785713	0.999996701290797	-4.69465660488583
GSE133767	10556901	Abca16	-0.11041875	-0.280922032931244	0.0600845329312444	1.793995625	-1.3683217118214	0.18936084710603	0.999996701290797	-4.48665773047752
GSE133767	10448527	Abca17	0.0849775000000008	-0.11891887318878	0.288873873188782	2.6698125	0.88058764254901	0.391052308236788	0.999996701290797	-4.69037105872787
GSE133767	10470050	Abca2	-0.132235000000001	-0.306429020311852	0.041959020311851	3.49554	-1.60395180365282	0.127489346226454	0.999996701290797	-4.36654586290231
GSE133767	10442396	Abca3	-0.00728875000000029	-0.220614820632479	0.206037320632478	2.976544375	-0.0721916981518394	0.943307891606832	0.999996701290797	-4.84622471852177
GSE133767	10495712	Abca4	0.0757774999999996	-0.127055968551816	0.278610968551815	2.35292625	0.789366684911031	0.440974327471322	0.999996701290797	-4.72030794118423
GSE133767	10392642	Abca5	0.0346662500000003	-0.14672821701885	0.216060717018851	1.930550625	0.403795027035035	0.691492920413529	0.999996701290797	-4.81335408596916
GSE133767	10392601	Abca6	-0.12402875	-0.289427033534942	0.0413695335349422	1.800389375	-1.58441704479637	0.131872651290921	0.999996701290797	-4.37693683829008
GSE133767	10364601	Abca7	0.0239387499999997	-0.290896219426981	0.33877371942698	2.756034375	0.160655886205236	0.87429401207785	0.999996701290797	-4.84190668980167
GSE133767	10392522	Abca8a	0.0121849999999997	-0.18345540017177	0.207825400171769	1.77666375	0.131596739248998	0.896877475976712	0.999996701290797	-4.84368593156286
GSE133767	10392484	Abca8b	0.0315487500000005	-0.174003723301178	0.237101223301179	1.830575625	0.324293009544861	0.749747323941537	0.999996701290797	-4.82535116479718
GSE133767	10392560	Abca9	-0.11938625	-0.345740850465545	0.106968350465545	2.062948125	-1.11440518127407	0.280905220159769	0.999996701290797	-4.60126881728563
GSE133767	10582626	Abcb10	-0.207566249999999	-0.423333950292484	0.00820145029248506	3.176236875	-2.03258372432265	0.0583301393117021	0.999996701290797	-4.12329625990599
GSE133767	10483410	Abcb11	-0.07022375	-0.249308014460353	0.108860514460353	1.861551875	-0.828523301618233	0.419071809750585	0.999996701290797	-4.70780670678913
GSE133767	10519527	Abcb1a	-0.0609350000000006	-0.305842864962144	0.183972864962142	1.74706125	-0.525705136585019	0.606011979080918	0.999996701290797	-4.79005909752822
GSE133767	10519555	Abcb1b	-0.17136	-0.38288085503426	0.04016085503426	1.8572275	-1.71172659128184	0.105474467112335	0.999996701290797	-4.30797677239454
GSE133767	10519578	Abcb4	0.0317649999999996	-0.195915430225519	0.259445430225519	2.3653425	0.294782225670107	0.771797455145284	0.999996701290797	-4.82915146251514
GSE133767	10403202	Abcb5	0.0571487499999996	-0.217801497578799	0.332098997578799	2.390858125	0.439168070889922	0.666175657891387	0.999996701290797	-4.80719980734823
GSE133767	10355742	Abcb6	0.0718712499999996	-0.167609100418154	0.311351600418153	2.932703125	0.6341083186336	0.534610155344282	0.999996701290797	-4.7645036617031
GSE133767	10606217	Abcb7	-0.26008875	-0.5972211581234	0.0770436581233999	2.226724375	-1.63004352871429	0.121828245724985	0.999996701290797	-4.3525559716993
GSE133767	10520154	Abcb8	-0.0154199999999993	-0.286291982837151	0.255451982837152	2.863505	-0.120281386076569	0.905697136828815	0.999996701290797	-4.84428336404066
GSE133767	10533734	Abcb9	0.00953499999999963	-0.25289194395589	0.27196194395589	3.53733375	0.0767698004395636	0.939719965390441	0.999996701290797	-4.84608162455371
GSE133767	10433735	Abcc1	-0.1172	-0.363426701660132	0.129026701660131	2.5422575	-1.00570498179421	0.328924493447503	0.999996701290797	-4.64481469428477
GSE133767	10451261	Abcc10	-0.0732412499999993	-0.248482040637115	0.101999540637117	3.449106875	-0.883077218583926	0.389744258900495	0.999996701290797	-4.68951443602765
GSE133767	10580418	Abcc12	0.0178162500000005	-0.20871801189478	0.244350511894781	2.866969375	0.166173030341901	0.87001831136632	0.999996701290797	-4.84152910564157
GSE133767	10463308	Abcc2	-0.1150925	-0.348508598370847	0.118323598370847	2.14803875	-1.04182399466113	0.312358571022845	0.999996701290797	-4.63074095136295
GSE133767	10389894	Abcc3	0.169465000000001	-0.124962657332992	0.463892657332994	2.5908175	1.21612873378031	0.240866027095952	0.999996701290797	-4.55741022878378
GSE133767	10422280	Abcc4	0.0331587499999992	-0.140849856602822	0.207167356602821	2.983741875	0.402629468978167	0.692333792268823	0.999996701290797	-4.81354836692309
GSE133767	10438478	Abcc5	0.0312474999999999	-0.13368038705429	0.196175387054289	1.97777125	0.400312654345495	0.694006447823096	0.999996701290797	-4.81393292870538
GSE133767	10563447	Abcc6	0.0796712500000001	-0.116500158174743	0.275842658174743	3.207891875	0.858112164944667	0.402992641357344	0.999996701290797	-4.69801039279598
GSE133767	10563487	Abcc8	0.0140487500000006	-0.169768509571172	0.197866009571174	2.599770625	0.161484013336292	0.873651967242773	0.999996701290797	-4.84185082316464
GSE133767	10549108	Abcc9	0.119188750000001	-0.121315868118524	0.359693368118526	2.564156875	1.04710439474484	0.309987837267064	0.999996701290797	-4.6286499707391
GSE133767	10600235	Abcd1	0.0606912499999996	-0.22742612298771	0.34880862298771	2.890873125	0.44507661183893	0.661985933546194	0.999996701290797	-4.80612328291381
GSE133767	10431697	Abcd2	0.13822625	-0.072339609050157	0.348792109050157	2.371103125	1.38701355964409	0.183693729116053	0.999996701290797	-4.47757413903164
GSE133767	10501832	Abcd3	0.15465	-0.0406041128353441	0.349904112835344	2.62534625	1.67350830126137	0.112874226386892	0.999996701290797	-4.32897827648485
GSE133767	10401488	Abcd4	-0.027506250000001	-0.193404756097493	0.138392256097492	2.371589375	-0.350321706639967	0.730481932461314	0.999996701290797	-4.82170482116058
GSE133767	10579874	Abce1	-0.0866837499999997	-1.10652828003343	0.933160780033426	3.354725625	-0.179589878782937	0.859638028634729	0.999996701290797	-4.84055798413479
GSE133767	10450648	Abcf1	0.0153799999999995	-0.155101926150569	0.185861926150568	4.4835625	0.190614585578318	0.851128180560675	0.999996701290797	-4.83970395718149
GSE133767	10528648	Abcf2	-0.087569999999999	-0.377654378734958	0.20251437873496	3.482285	-0.637836171956019	0.532239263993739	0.999996701290797	-4.76354580004662
GSE133767	10434396	Abcf3	0.00932000000000022	-0.162626737423712	0.181266737423713	1.95962125	0.114524949734023	0.910188900749801	0.999996701290797	-4.84456675203003
GSE133767	10443730	Abcg1	0.0457762499999999	-0.160152050529645	0.251704550529645	3.379675625	0.46968026690695	0.644664812512123	0.999996701290797	-4.80149197624593
GSE133767	10538640	Abcg2	0.0314350000000008	-0.167702447672632	0.230572447672634	1.81190125	0.333532889134851	0.742888017862335	0.999996701290797	-4.82408827652904
GSE133767	10531952	Abcg3	-0.136285	-0.35032617580942	0.0777561758094211	1.81342625	-1.34533012677361	0.196523552475811	0.999996701290797	-4.49771698886337
GSE133767	10592772	Abcg4	-0.110498749999999	-0.366961915363742	0.145964415363743	3.149363125	-0.910354418057923	0.37560325119116	0.999996701290797	-4.67999385830631
GSE133767	10453318	Abcg5	0.0193362500000003	-0.238212402008513	0.276884902008513	2.282093125	0.158632112796766	0.875863417912361	0.999996701290797	-4.8420420137042
GSE133767	10447239	Abcg8	-0.0433387499999998	-0.247657801095571	0.160980301095571	2.595105625	-0.448172965133785	0.659794916069758	0.999996701290797	-4.80555360505723
GSE133767	10520622	Abhd1	0.0353900000000005	-0.182690594397853	0.253470594397853	2.20235125	0.342879624195089	0.735971997314625	0.999996701290797	-4.82277546685584
GSE133767	10439701	Abhd10	-0.0063074999999988	-0.237300084730137	0.224685084730139	2.99292	-0.0576948911006559	0.954677165584065	0.999996701290797	-4.84661985944799
GSE133767	10526250	Abhd11	-0.17701875	-0.356716440888504	0.00267894088850476	2.712316875	-2.08139693400072	0.0531284948636784	0.999996701290797	-4.09413511943661
GSE133767	10488507	Abhd12	0.171984999999999	-0.0621715298505966	0.406141529850595	3.018025	1.55189536014358	0.13945247259248	0.999996701290797	-4.39407315317303
GSE133767	10396148	Abhd12b	-0.0102787499999999	-0.175877360183419	0.15531986018342	1.534026875	-0.1311480244459	0.897226966261973	0.999996701290797	-4.84371064184646
GSE133767	10570013	Abhd13	0.0835124999999999	-0.143261588572837	0.310286588572837	2.39353375	0.778101391321636	0.447406256072377	0.999996701290797	-4.7238056006543
GSE133767	10596481	Abhd14a	0.0965800000000008	-0.143837861864059	0.33699786186406	2.4828075	0.848786782188785	0.408016202473715	0.999996701290797	-4.70113001918375
GSE133767	10588505	Abhd14b	0.0358374999999995	-0.274138222329616	0.345813222329615	2.25053375	0.244280141289279	0.809993223893847	0.999996701290797	-4.83482674693621
GSE133767	10378893	Abhd15	0.0192062500000016	-0.206262981974043	0.244675481974047	4.053456875	0.179983805197938	0.859333647582212	0.999996701290797	-4.84052833937095
GSE133767	10444685	Abhd16a	0.0193112500000003	-0.209243703605947	0.247866203605948	4.463165625	0.178524524497647	0.860461325946222	0.999996701290797	-4.8406378335505
GSE133767	10479625	Abhd16b	-0.11859	-0.412360557340624	0.175180557340623	2.41851375	-0.852938934143225	0.405774433684702	0.999996701290797	-4.69974463863837
GSE133767	10370914	Abhd17a	0.0518362500000009	-0.146781000825522	0.250453500825523	2.684205625	0.551435532123437	0.588646540016106	0.999996701290797	-4.78439954138566
GSE133767	10461999	Abhd17b	0.0220187500000004	-0.154747352033626	0.198784852033627	2.351330625	0.263191471746755	0.795626397424356	0.999996701290797	-4.83282439815534
GSE133767	10565288	Abhd17c	-0.1250625	-0.467552201913465	0.217427201913465	4.52952375	-0.771538719145817	0.451179937238729	0.999996701290797	-4.7258226261958
GSE133767	10554269	Abhd2	0.0170725000000007	-0.244857550614274	0.279002550614276	2.4484775	0.137717754154752	0.892112216783399	0.999996701290797	-4.84334045421256
GSE133767	10457475	Abhd3	-0.00707874999999958	-0.230780660462669	0.21662316046267	1.850720625	-0.0668597916370047	0.947488163970833	0.999996701290797	-4.8463802970596
GSE133767	10415021	Abhd4	-0.0476399999999999	-0.336072861025534	0.240792861025535	2.36966625	-0.348983707565843	0.731467880701597	0.999996701290797	-4.82189896650171
GSE133767	10590452	Abhd5	0.0522099999999996	-0.270367490154339	0.374787490154339	2.819565	0.341977688073565	0.736638369156528	0.999996701290797	-4.82290369627175
GSE133767	10412607	Abhd6	-0.1477425	-0.44097666561058	0.145491665610579	2.2586925	-1.06455722295063	0.302244486939252	0.999996701290797	-4.62167883762883
GSE133767	10579500	Abhd8	0.00566875000000033	-0.22631966821844	0.23765716821844	3.419473125	0.051629644886183	0.959437035473487	0.999996701290797	-4.84675902590411
GSE133767	10480423	Abi1	0.0665299999999993	-0.129224598930503	0.262284598930502	3.00463	0.718097949847084	0.482634270375853	0.999996701290797	-4.74167795517009
GSE133767	10346764	Abi2	-0.1465175	-0.43296642241036	0.139931422410359	3.51942375	-1.08073805519798	0.295191887695689	0.999996701290797	-4.6151341595432
GSE133767	10390186	Abi3	-0.00938374999999914	-0.268855946486023	0.250088446486024	3.730768125	-0.0764123819582723	0.940000032467574	0.999996701290797	-4.84609311227706
GSE133767	10436304	Abi3bp	-0.0308262500000001	-0.229871104436235	0.168218604436235	2.424773125	-0.327226056424877	0.747567575955195	0.999996701290797	-4.82495404612223
GSE133767	10471201	Abl1	0.0503412499999993	-0.185540799748897	0.286223299748895	2.785199375	0.450928037433667	0.65784806800656	0.999996701290797	-4.80504352406962
GSE133767	10350823	Abl2	-0.075755	-0.286059400459455	0.134549400459455	2.79250625	-0.761098874527948	0.45722345764114	0.999996701290797	-4.7289999666438
GSE133767	10468691	Ablim1	0.0376962499999993	-0.202592138268558	0.277984638268556	3.110956875	0.331469445562907	0.74441792519337	0.999996701290797	-4.82437331645422
GSE133767	10521415	Ablim2	-0.0112025	-0.1863179885312	0.1639129885312	3.8144475	-0.135166332392738	0.894098013015466	0.999996701290797	-4.8434863615119
GSE133767	10459262	Ablim3	-0.0640987499999999	-0.318284584779675	0.190087084779675	2.919388125	-0.53281488989891	0.601188601149587	0.999996701290797	-4.78852082807528
GSE133767	10481114	Abo	-0.13930375	-0.383193574900136	0.104586074900136	1.878035625	-1.20683323851985	0.244332930717087	0.999996701290797	-4.56153695111712
GSE133767	10388545	Abr	-0.0302337499999994	-0.194366514471002	0.133899014471003	3.008694375	-0.389201827238152	0.702050568982007	0.999996701290797	-4.81574726302194
GSE133767	10428370	Abra	-0.0479775	-0.237838156807292	0.141883156807292	2.221435	-0.533925634494236	0.600436765282908	0.999996701290797	-4.7882787404986
GSE133767	10368041	Abracl	0.0994562500000002	-0.330827666476739	0.529740166476739	4.830516875	0.488376889430286	0.631641013264861	0.999996701290797	-4.79781307447011
GSE133767	10408168	Abt1	0.0928687500000014	-0.204098085103775	0.389835585103778	3.280320625	0.660753978500367	0.517792353412575	0.999996701290797	-4.75754352828899
GSE133767	10546137	Abtb1	0.171906250000001	-0.0965412958710307	0.440353795871032	2.361664375	1.35303915883332	0.19409812207199	0.999996701290797	-4.49402297992971
GSE133767	10474181	Abtb2	0.0375074999999998	-0.191459521898821	0.26647452189882	3.09625625	0.346117310005499	0.733581708123216	0.999996701290797	-4.82231244161949
GSE133767	10385426	AC098736.2	0.316456249999999	-0.523987498097401	1.1568999980974	6.393955625	0.795578730227816	0.437452424825218	0.999996701290797	-4.71836021214935
GSE133767	10583112	AC115689.1	-0.113762500000001	-0.31728120177413	0.0897562017741287	2.2933375	-1.18106266471789	0.254144338311349	0.999996701290797	-4.57285472971992
GSE133767	10558439	AC118721.1	-0.0545112500000009	-0.204451976651039	0.0954294766510375	3.502173125	-0.768147580599777	0.453137603008663	0.999996701290797	-4.72685893568027
GSE133767	10345241	AC123072.1	-0.0204337499999996	-0.183997351999886	0.143129851999887	2.509789375	-0.263960867426258	0.795043452091459	0.999996701290797	-4.8327398150518
GSE133767	10536163	AC123873.1	0.0739349999999996	-0.0512902131581391	0.199160213158138	2.44458875	1.24748816706831	0.22944894593897	0.999996701290797	-4.54331759101707
GSE133767	10536037	AC123873.2	0.0292300000000001	-0.424947780549661	0.483407780549661	2.30086625	0.135981888694077	0.893463178159586	0.999996701290797	-4.84344001818895
GSE133767	10536037	AC124606.1	0.0292300000000001	-0.424947780549661	0.483407780549661	2.30086625	0.135981888694077	0.893463178159586	0.999996701290797	-4.84344001818895
GSE133767	10536037	AC124606.2	0.0292300000000001	-0.424947780549661	0.483407780549661	2.30086625	0.135981888694077	0.893463178159586	0.999996701290797	-4.84344001818895
GSE133767	10536037	AC125178.1	0.0292300000000001	-0.424947780549661	0.483407780549661	2.30086625	0.135981888694077	0.893463178159586	0.999996701290797	-4.84344001818895
GSE133767	10582868	AC132444.1	-0.0578074999999991	-0.367642417107577	0.252027417107579	4.18110125	-0.394213929315813	0.698417274798857	0.999996701290797	-4.81493495003189
GSE133767	10536163	AC133095.1	0.0739349999999996	-0.0512902131581391	0.199160213158138	2.44458875	1.24748816706831	0.22944894593897	0.999996701290797	-4.54331759101707
GSE133767	10535994	AC133095.2	0.1127775	-0.108221231056189	0.33377623105619	2.0841375	1.07822853307897	0.296277742913145	0.999996701290797	-4.61615429869658
GSE133767	10356278	AC133103.1	0.0519300000000005	-0.134266734416675	0.238126734416676	3.39593375	0.589283661440446	0.563567647258808	0.999996701290797	-4.77561276242835
GSE133767	10535994	AC140325.3	0.1127775	-0.108221231056189	0.33377623105619	2.0841375	1.07822853307897	0.296277742913145	0.999996701290797	-4.61615429869658
GSE133767	10536163	AC140365.1	0.0739349999999996	-0.0512902131581391	0.199160213158138	2.44458875	1.24748816706831	0.22944894593897	0.999996701290797	-4.54331759101707
GSE133767	10493925	AC158361.3	-0.15468375	-0.368526958275665	0.059159458275665	2.804554375	-1.52836600032084	0.145161949620944	0.999996701290797	-4.40634096085949
GSE133767	10493925	AC158361.4	-0.15468375	-0.368526958275665	0.059159458275665	2.804554375	-1.52836600032084	0.145161949620944	0.999996701290797	-4.40634096085949
GSE133767	10493925	AC158361.5	-0.15468375	-0.368526958275665	0.059159458275665	2.804554375	-1.52836600032084	0.145161949620944	0.999996701290797	-4.40634096085949
GSE133767	10589462	AC161246.1	0.13894	-0.147892761383055	0.425772761383056	3.43555125	1.02347367804798	0.32069857227398	0.999996701290797	-4.63794131773613
GSE133767	10536163	AC163611.1	0.0739349999999996	-0.0512902131581391	0.199160213158138	2.44458875	1.24748816706831	0.22944894593897	0.999996701290797	-4.54331759101707
GSE133767	10536037	AC164084.1	0.0292300000000001	-0.424947780549661	0.483407780549661	2.30086625	0.135981888694077	0.893463178159586	0.999996701290797	-4.84344001818895
GSE133767	10536037	AC165294.3	0.0292300000000001	-0.424947780549661	0.483407780549661	2.30086625	0.135981888694077	0.893463178159586	0.999996701290797	-4.84344001818895
GSE133767	10451860	AC182748.1	-0.0956400000000002	-0.261833354274017	0.070553354274017	1.8612375	-1.21591733869482	0.24094444791914	0.999996701290797	-4.55750433648919
GSE133767	10528183	AC244695.1	-0.117985	-0.335453741550702	0.099483741550701	2.5180825	-1.14632586805397	0.26783912240137	0.999996701290797	-4.58781907097815
GSE133767	10528183	AC244695.2	-0.117985	-0.335453741550702	0.099483741550701	2.5180825	-1.14632586805397	0.26783912240137	0.999996701290797	-4.58781907097815
GSE133767	10528183	AC244695.4	-0.117985	-0.335453741550702	0.099483741550701	2.5180825	-1.14632586805397	0.26783912240137	0.999996701290797	-4.58781907097815
GSE133767	10590137	Acaa1a	0.0120862500000016	-0.236844970470933	0.261017470470936	3.399626875	0.102586530495539	0.919514306909324	0.999996701290797	-4.84511028991781
GSE133767	10597592	Acaa1b	0.080265	-0.210602635189939	0.371132635189939	1.5835075	0.583054225697868	0.567656518204485	0.999996701290797	-4.77709654820682
GSE133767	10456699	Acaa2	0.189311250000001	-0.100688924785852	0.479311424785853	3.306013125	1.37929226495891	0.186017893732515	0.999996701290797	-4.48133638277194
GSE133767	10394538	Acaca	-0.112086249999999	-0.301737158100173	0.0775646581001735	2.405759375	-1.24875014075347	0.228998438645206	0.999996701290797	-4.54274502075499
GSE133767	10524460	Acacb	-0.0940600000000003	-0.29805089594637	0.109930895946369	3.04874375	-0.974254288702976	0.343847950699692	0.999996701290797	-4.65673903746305
GSE133767	10533367	Acad10	-0.0866850000000003	-0.225677462486321	0.0523074624863201	1.99033	-1.31774337521555	0.205401865323378	0.999996701290797	-4.51081740546773
GSE133767	10588357	Acad11	0.0108312499999994	-0.246794141227294	0.268456641227293	2.337916875	0.0888317162815709	0.930273466895832	0.999996701290797	-4.84566255464113
GSE133767	10533360	Acad12	0.0154449999999999	-0.225703615827095	0.256593615827095	1.92035875	0.135326009792845	0.893973713138117	0.999996701290797	-4.84347730984418
GSE133767	10591947	Acad8	0.0447350000000006	-0.182662510971162	0.272132510971164	2.6902275	0.415661568634011	0.682955814295841	0.999996701290797	-4.81134516914539
GSE133767	10491526	Acad9	0.025181250000001	-0.267391220717334	0.317753720717336	3.261433125	0.18185362508628	0.857889177880432	0.999996701290797	-4.84038674656058
GSE133767	10355246	Acadl	-0.116288749999999	-0.608293968780534	0.375716468780535	2.964213125	-0.499397231124819	0.624022116813367	0.999996701290797	-4.79558041666808
GSE133767	10502951	Acadm	-0.108973750000001	-0.947698684018873	0.729751184018872	3.370346875	-0.274524101761924	0.787052820453563	0.999996701290797	-4.83155393306803
GSE133767	10532926	Acads	0.0742487500000006	-0.134391230600598	0.2828887306006	3.314893125	0.751916733919888	0.462579737777941	0.999996701290797	-4.73176260356003
GSE133767	10558227	Acadsb	0.0418062499999998	-0.19181887108494	0.275431371084939	1.508675625	0.378094022213334	0.710129109109434	0.999996701290797	-4.81751151355015
GSE133767	10387768	Acadvl	0.0713050000000006	-0.161020637077915	0.303630637077916	3.897265	0.648486567558331	0.525497839095241	0.999996701290797	-4.76078067761804
GSE133767	10554249	Acan	-0.109926249999999	-0.372044518603378	0.15219201860338	2.841158125	-0.886099026558003	0.388160477410486	0.999996701290797	-4.68847190124054
GSE133767	10387699	Acap1	-0.0629000000000008	-0.236179252808909	0.110379252808907	2.615185	-0.76697678021114	0.453814707127354	0.999996701290797	-4.72721578129954
GSE133767	10438980	Acap2	0.0621625000000001	-0.145569636409574	0.269894636409575	1.77603	0.632270503776163	0.535781132572443	0.999996701290797	-4.76497397345707
GSE133767	10511226	Acap3	-0.14393875	-0.316146556726523	0.0282690567265236	2.740780625	-1.76605013637649	0.0956812920270628	0.999996701290797	-4.27771455853975
GSE133767	10593591	Acat1	-0.0236749999999999	-0.247173077482226	0.199823077482226	2.8452625	-0.223817650891053	0.825617448776703	0.999996701290797	-4.83682706989381
GSE133767	10447891	Acat2	-0.0846337500000001	-0.517437557448906	0.348170057448906	2.703078125	-0.413171777802356	0.684743417233509	0.999996701290797	-4.81177133958345
GSE133767	10447885	Acat3	-0.1865325	-0.437328807640555	0.0642638076405554	2.65698375	-1.57148959506604	0.134842937075791	0.999996701290797	-4.38377319960927
GSE133767	10352281	Acbd3	-0.0397712499999998	-0.289332101077474	0.209789601077475	2.785846875	-0.336721556432481	0.74052601301461	0.999996701290797	-4.82364439611633
GSE133767	10381683	Acbd4	-0.0364537500000006	-0.252495554282062	0.17958805428206	3.401450625	-0.356518895552834	0.725921697242207	0.999996701290797	-4.82079614277362
GSE133767	10469720	Acbd5	-0.201792500000001	-0.574846161807647	0.171261161807645	1.93097125	-1.14290952149992	0.269215390019759	0.999996701290797	-4.58927246609081
GSE133767	10350777	Acbd6	-0.25561	-0.632851157828152	0.121631157828152	2.66692	-1.43165016769365	0.170714795627025	0.999996701290797	-4.45555510603224
GSE133767	10468945	Acbd7	0.115702500000001	-0.0522581855998388	0.28366318559984	1.4299475	1.45550345759975	0.164092193088131	0.999996701290797	-4.44360434749694
GSE133767	10485241	Accs	0.0444887500000002	-0.205331191530091	0.294308691530092	2.678875625	0.376271425245121	0.711458092635224	0.999996701290797	-4.81779625239322
GSE133767	10485261	Accsl	0.10293125	-0.0400647484647672	0.245927248464767	2.566038125	1.5209029407241	0.147013233797293	0.999996701290797	-4.41020870451597
GSE133767	10581311	Acd	0.10815	-0.0796604405156753	0.295960440515676	2.80044	1.21670398282436	0.240652727442856	0.999996701290797	-4.55715408165452
GSE133767	10381962	Ace	-0.1874925	-0.484180212276416	0.109195212276415	3.0696025	-1.33524966414954	0.199731576448853	0.999996701290797	-4.50252560912995
GSE133767	10603066	Ace2	0.08891125	-0.0820979278339186	0.259920427833919	1.687183125	1.09853888500384	0.287573083696566	0.999996701290797	-4.60784454599344
GSE133767	10452202	Acer1	-0.0553124999999994	-0.386424178822506	0.275799178822507	2.13768125	-0.352961166485052	0.728538387376081	0.999996701290797	-4.82131970526796
GSE133767	10505779	Acer2	-0.0795299999999997	-0.256968321094372	0.0979083210943731	2.3602575	-0.947025558861535	0.357144136909394	0.999996701290797	-4.66680945898761
GSE133767	10565712	Acer3	-0.0287937499999995	-0.211837737297551	0.154250237297552	1.481179375	-0.332369297596611	0.74375060836713	0.999996701290797	-4.82424922561747
GSE133767	10526559	Ache	0.032343749999999	-0.15871980376005	0.223407303760048	2.954008125	0.357676706124735	0.725070884993994	0.999996701290797	-4.82062465205348
GSE133767	10419825	Acin1	0.0745062500000007	-0.129026321668237	0.278038821668238	2.817758125	0.773458332631748	0.450074086115635	0.999996701290797	-4.72523420646819
GSE133767	10360344	Ackr1	0.0422162500000007	-0.171391631048158	0.25582413104816	1.761768125	0.417580796532241	0.68157918365129	0.999996701290797	-4.81101497047188
GSE133767	10590427	Ackr2	-0.255930000000001	-0.56391623917627	0.0520562391762691	2.63293875	-1.75577160543707	0.0974710115284436	0.999996701290797	-4.28347614652161
GSE133767	10348451	Ackr3	0.13221	-0.0752813829370236	0.339701382937024	1.953415	1.34630164736783	0.196216562271176	0.999996701290797	-4.49725224685171
GSE133767	10596222	Ackr4	-4.37500000010083e-05	-0.173019971033253	0.172932471033251	3.279541875	-0.000534404110145602	0.999579946333237	0.999996701290797	-4.84731851254597
GSE133767	10391146	Acly	-0.07222375	-0.24612078537788	0.10167328537788	3.376086875	-0.877538124130984	0.392658519337563	0.999996701290797	-4.69141752493685
GSE133767	10349431	Acmsd	-0.168095	-0.370317125205299	0.0341271252052991	2.45053	-1.75632248999891	0.0973743547272509	0.999996701290797	-4.28316776467363
GSE133767	10536359	Acn9	0.0603412500000005	-0.188683895437382	0.309366395437383	2.488716875	0.511975569091916	0.61537950050769	0.999996701290797	-4.79297415924312
GSE133767	10512892	Acnat1	-0.35622	-0.649460283386716	-0.0629797166132833	3.6733775	-2.56668637993875	0.0202184172576418	0.999996701290797	-3.79569853440584
GSE133767	10512886	Acnat2	0.1563025	-0.0858386934304009	0.3984436934304	1.76346875	1.36387755746142	0.190728758996468	0.999996701290797	-4.48880528792605
GSE133767	10503966	Aco1	0.0587100000000005	-0.16451560700859	0.281935607008591	2.71947875	0.555707431984455	0.585787871577212	0.999996701290797	-4.78343522221387
GSE133767	10425611	Aco2	0.121842500000001	-0.189010004845142	0.432695004845143	3.47605125	0.828175860083227	0.419263036126943	0.999996701290797	-4.70791996136619
GSE133767	10397148	Acot1	-0.173704999999999	-0.334435665785072	-0.0129743342149265	1.76873125	-2.28345108686275	0.0358063231312704	0.999996701290797	-3.97135029919697
GSE133767	10427883	Acot10	0.0840824999999998	-0.28121250295423	0.44937750295423	1.44749	0.486340035211927	0.633053915277353	0.999996701290797	-4.79822052356728
GSE133767	10514865	Acot11	0.00730374999999972	-0.260901006770006	0.275508506770006	3.205480625	0.057538370780805	0.954799977849063	0.999996701290797	-4.84662364477676
GSE133767	10406564	Acot12	-0.0870049999999996	-0.361706936081705	0.187696936081705	2.75201	-0.669207236082187	0.512519990302727	0.999996701290797	-4.75528047008788
GSE133767	10408331	Acot13	0.0436074999999998	-0.237631745215136	0.324846745215135	2.65581125	0.327614717191022	0.747278900393802	0.999996701290797	-4.82490116074293
GSE133767	10397145	Acot2	-0.028095	-0.265714539083844	0.209524539083844	2.45811875	-0.249818746306535	0.805778076795097	0.999996701290797	-4.83425558018329
GSE133767	10397158	Acot3	-0.0591449999999996	-0.328576557170998	0.210286557170999	2.6321075	-0.463818121123641	0.64877321686963	0.999996701290797	-4.80261714191083
GSE133767	10397153	Acot4	0.0874274999999989	-0.208801004816231	0.383656004816229	1.75619	0.623590299319179	0.541330799011263	0.999996701290797	-4.76717823252454
GSE133767	10397166	Acot5	0.0738425	-0.230445381639542	0.378130381639542	3.9864175	0.51274315593961	0.614853953087543	0.999996701290797	-4.79281311819732
GSE133767	10397172	Acot6	-0.0894500000000007	-0.294419759725464	0.115519759725463	3.42176625	-0.922080186653101	0.369631968193587	0.999996701290797	-4.67582576856385
GSE133767	10510687	Acot7	-0.118753750000002	-0.287169989747652	0.0496624897476489	3.980515625	-1.48984642555698	0.154929798345874	0.999996701290797	-4.4261802982288
GSE133767	10489553	Acot8	0.0206125000000004	-0.217946020364998	0.259171020364999	3.688505	0.18256346648537	0.857340948317196	0.999996701290797	-4.84033261276179
GSE133767	10602739	Acot9	-0.246801249999999	-0.713181791034135	0.219579291034137	4.011823125	-1.11811138682925	0.279364308472527	0.999996701290797	-4.59972224752206
GSE133767	10393177	Acox1	0.0421624999999999	-0.22620217397325	0.31052717397325	2.39052875	0.331954946343879	0.744057858995341	0.999996701290797	-4.82430640613556
GSE133767	10417544	Acox2	-0.0398087499999997	-0.327046417186202	0.247428917186203	2.493365625	-0.292829811028492	0.773263644048974	0.999996701290797	-4.82939033142203
GSE133767	10521391	Acox3	-0.11936375	-0.368363106286561	0.129635606286561	3.569938125	-1.01286687308537	0.325591123022506	0.999996701290797	-4.64205605697135
GSE133767	10475845	Acoxl	-0.0123775000000004	-0.184614778313637	0.159859778313637	2.34180875	-0.151839203912902	0.88113507802573	0.999996701290797	-4.84248375170321
GSE133767	10606532	Acp1	0.0450987500000006	-0.724803137830206	0.815000637830207	3.340576875	0.123767682049968	0.902978360931173	0.999996701290797	-4.84410499750465
GSE133767	10473847	Acp2	-0.11087	-0.324342195697973	0.102602195697973	1.99191625	-1.09736440177404	0.288071263389097	0.999996701290797	-4.60832838266677
GSE133767	10591739	Acp5	-0.10363375	-0.324887639793557	0.117620139793557	2.384724375	-0.989665511765511	0.336477153128664	0.999996701290797	-4.65093480390245
GSE133767	10494551	Acp6	0.210112500000001	-0.12275082384881	0.542975823848812	2.931645	1.33371821310344	0.200222582580665	0.999996701290797	-4.50325398076147
GSE133767	10596303	Acpp	0.0210837499999998	-0.140984957949859	0.183152457949858	2.573565625	0.274869672735789	0.78679181862693	0.999996701290797	-4.83151436273648
GSE133767	10562741	Acpt	-0.140245	-0.361199537188839	0.0807095371888391	3.99865125	-1.34110443909006	0.197863294709436	0.999996701290797	-4.49973575057543
GSE133767	10426284	Acr	-0.239026250000001	-0.495262504636035	0.0172100046360329	4.513248125	-1.97098426694374	0.0655511256982199	0.999996701290797	-4.15975188532939
GSE133767	10541785	Acrbp	-0.0893125000000006	-0.287832830144764	0.109207830144763	2.61643125	-0.950572825248501	0.355392164381952	0.999996701290797	-4.66551097487664
GSE133767	10584254	Acrv1	0.021827500000001	-0.215343368290566	0.258998368290568	2.53169875	0.194455750431681	0.848167612953417	0.999996701290797	-4.83939453603043
GSE133767	10593723	Acsbg1	0.00408749999999936	-0.239796383330334	0.247971383330333	3.06495	0.0354121912722343	0.972171383649664	0.999996701290797	-4.84705531966751
GSE133767	10452172	Acsbg2	0.0466112500000011	-0.172759071945824	0.265981571945826	2.380660625	0.448942803699376	0.65925066215662	0.999996701290797	-4.80541137783558
GSE133767	10390032	Acsf2	0.0432837499999987	-0.304993437426615	0.391560937426613	3.343598125	0.262589882369837	0.796082288372927	0.999996701290797	-4.83289036384294
GSE133767	10576160	Acsf3	0.108497500000001	-0.097056058500591	0.314051058500593	2.5598325	1.1152516358814	0.280552739635682	0.999996701290797	-4.60091594917048
GSE133767	10571657	Acsl1	0.179263750000001	-0.00967696921646255	0.368204469216464	1.988489375	2.00467996592491	0.061507025973483	0.999996701290797	-4.13986003503727
GSE133767	10347748	Acsl3	-0.0661587499999996	-0.45732641870023	0.325008918700231	2.753806875	-0.357357150605321	0.725305672050716	0.999996701290797	-4.82067203766151
GSE133767	10607089	Acsl4	0.0516762499999999	-0.13549952173986	0.23885202173986	1.717969375	0.583336961884698	0.567470600510166	0.999996701290797	-4.77702952296234
GSE133767	10464045	Acsl5	0.0342187500000004	-0.191238747867762	0.259676247867763	2.259045625	0.320684223865289	0.752432255852007	0.999996701290797	-4.82583496681716
GSE133767	10376096	Acsl6	0.0353824999999994	-0.140601221744588	0.211366221744587	2.51886875	0.424809435723158	0.676404618424943	0.999996701290797	-4.80975810670106
GSE133767	10556734	Acsm1	0.134754999999999	-0.102005331826755	0.371515331826754	2.5729	1.20258030130342	0.24593183209388	0.999996701290797	-4.56341723443313
GSE133767	10556718	Acsm2	0.10523375	-0.155600245015486	0.366067745015487	2.054761875	0.852450148557335	0.406037913748947	0.999996701290797	-4.69990802757771
GSE133767	10556769	Acsm3	-0.134209999999999	-0.373310671833866	0.104890671833867	2.00326875	-1.18599324981677	0.252244327412976	0.999996701290797	-4.57070343823039
GSE133767	10556749	Acsm4	-0.0763912500000004	-0.373102732915882	0.220320232915882	1.927761875	-0.543985595172498	0.593648658145206	0.999996701290797	-4.7860644668528
GSE133767	10556701	Acsm5	0.0116525000000003	-0.193137254926064	0.216442254926064	2.00922	0.120223404606165	0.905742363783363	0.999996701290797	-4.84428628753978
GSE133767	10488482	Acss1	-0.0935175000000004	-0.279832480153495	0.0927974801534946	2.90424	-1.06053071495502	0.304018364138096	0.999996701290797	-4.623295277235
GSE133767	10477649	Acss2	0.0816537500000001	-0.104431830173314	0.267739330173314	2.596223125	0.92713195770396	0.367079339530094	0.999996701290797	-4.67401617722814
GSE133767	10372208	Acss3	-0.0856912499999998	-0.239978086181901	0.0685955861819018	2.034196875	-1.17350715490618	0.257076936095755	0.999996701290797	-4.57613826809604
GSE133767	10582592	Acta1	0.0777662499999985	-0.0695001984051082	0.225032698405105	3.779045625	1.11574636665196	0.280346875823215	0.999996701290797	-4.60070961075559
GSE133767	10467124	Acta2	0.00127250000000023	-0.202170846311489	0.204715846311489	2.6562375	0.0132157689589471	0.989612427923778	0.999996701290797	-4.8472819055455
GSE133767	10535381	Actb	0.17421875	-1.16753482042843	1.51597232042843	7.098913125	0.274347035068722	0.78718656498942	0.999996701290797	-4.83157418945283
GSE133767	10407141	Actbl2	-0.230738749999999	-0.500393007628791	0.0389155076287933	2.069803125	-1.80797071233707	0.0886762863580109	0.999996701290797	-4.25405089047895
GSE133767	10485982	Actc1	-0.0636787500000011	-0.305624854394238	0.178267354394236	3.847975625	-0.556101457204688	0.585524552694527	0.999996701290797	-4.78334592375573
GSE133767	10393754	Actg-ps1	-0.0285749999999982	-0.983158966240599	0.926008966240603	6.941425	-0.0632485015516932	0.950320359248075	0.999996701290797	-4.84647889870276
GSE133767	10393754	Actg1	-0.0285749999999982	-0.983158966240599	0.926008966240603	6.941425	-0.0632485015516932	0.950320359248075	0.999996701290797	-4.84647889870276
GSE133767	10545707	Actg2	0.09943875	-0.166160310411026	0.365037810411026	2.977786875	0.791056055297241	0.440014790422811	0.999996701290797	-4.71977958969983
GSE133767	10477555	Actl10	-0.0568962499999999	-0.335266098591083	0.221473598591083	3.005099375	-0.431856625882004	0.671375954626366	0.999996701290797	-4.80851274641907
GSE133767	10588752	Actl11	-0.0460849999999997	-0.341764505489594	0.249594505489594	3.37981125	-0.329318786094939	0.746013670418444	0.999996701290797	-4.82466856099452
GSE133767	10491385	Actl6a	-0.1625425	-0.487644429368831	0.162559429368831	2.91359875	-1.05639302620909	0.305849074903008	0.999996701290797	-4.62495127221769
GSE133767	10526614	Actl6b	0.120725	-0.127987227375608	0.369437227375608	2.8944475	1.02560047763616	0.319723897341197	0.999996701290797	-4.63711208426605
GSE133767	10505107	Actl7a	-0.0283475000000002	-0.297034403233874	0.240339403233874	2.628535	-0.222918649517453	0.826305671154416	0.999996701290797	-4.83691098196315
GSE133767	10513016	Actl7b	0.0807674999999999	-0.122541412514798	0.284076412514798	3.9165	0.839379503757548	0.413124980402671	0.999996701290797	-4.70424709780905
GSE133767	10443946	Actl9	-0.0591500000000003	-0.318135222876148	0.199835222876147	3.675325	-0.482567312956829	0.635674797220158	0.999996701290797	-4.79897091585977
GSE133767	10401244	Actn1	-0.179735	-0.52639179528768	0.16692179528768	3.17629375	-1.0954967045229	0.288864791355205	0.999996701290797	-4.6090969601931
GSE133767	10407742	Actn2	-0.0473850000000002	-0.285701370186046	0.190931370186045	2.90771125	-0.420112057959333	0.679765321115725	0.999996701290797	-4.8105772243882
GSE133767	10464836	Actn3	-0.19183	-0.416383122897737	0.0327231228977376	3.0956975	-1.80499317795518	0.089158549250463	0.999996701290797	-4.25574023541248
GSE133767	10561527	Actn4	-0.20232	-0.618131510152503	0.213491510152502	4.75145625	-1.0280646984387	0.318597236186589	0.999996701290797	-4.63614955226217
GSE133767	10396177	Actr10	0.0531762499999995	-0.225828239185243	0.332180739185242	2.248415625	0.40270280407465	0.692280873697181	0.999996701290797	-4.81353615911153
GSE133767	10468217	Actr1a	-0.10605875	-0.340008646256075	0.127891146256076	2.734769375	-0.957859441920876	0.351811950966227	0.999996701290797	-4.66283100854989
GSE133767	10353934	Actr1b	-0.1565525	-0.406311541451081	0.0932065414510813	4.47452375	-1.32439314931186	0.203233125956936	0.999996701290797	-4.50767665260339
GSE133767	10384522	Actr2	0.195201249999999	-1.287903061458	1.678305561458	6.000559375	0.278092344982328	0.784359071662982	0.999996701290797	-4.83114298221001
GSE133767	10357332	Actr3	0.13246375	-0.853457739252877	1.11838523925288	3.642434375	0.283878727762586	0.779996804427928	0.999996701290797	-4.8304654590828
GSE133767	10520304	Actr3b	-0.1342975	-0.410583144256605	0.141988144256606	2.09901125	-1.02704091626646	0.319064972355763	0.999996701290797	-4.63654967113423
GSE133767	10478133	Actr5	0.159522500000001	-0.0806176367202565	0.399662636720258	3.37008875	1.40357405236712	0.178788096992326	0.999996701290797	-4.46945815950961
GSE133767	10371830	Actr6	0.18466625	-0.182628237431691	0.551960737431691	1.705423125	1.0623099691972	0.303233585000227	0.999996701290797	-4.62258159680386
GSE133767	10413502	Actr8	-0.0982562499999995	-0.340704659074915	0.144192159074916	2.998060625	-0.856286276315849	0.40397304567877	0.999996701290797	-4.69862352863508
GSE133767	10599425	Actrt1	-0.0793187499999997	-0.361414435371593	0.202776935371594	2.239725625	-0.594097267671097	0.560418746096323	0.999996701290797	-4.77445612266988
GSE133767	10519048	Actrt2	-0.0709212500000005	-0.454619008952257	0.312776508952256	3.261453125	-0.390539760990944	0.701079962675305	0.999996701290797	-4.81553141094636
GSE133767	10497617	Actrt3	0.092285	-0.181348941103586	0.365918941103586	2.89916875	0.712589285907674	0.485949184072878	0.999996701290797	-4.74325407777201
GSE133767	10482824	Acvr1	0.0247475000000001	-0.17545232994357	0.22494732994357	2.54056375	0.26118351719218	0.797148343478459	0.999996701290797	-4.83304399390448
GSE133767	10427015	Acvr1b	-0.112958749999999	-0.282308705866068	0.0563912058660705	2.851431875	-1.40933074822988	0.177107930451793	0.999996701290797	-4.46662210203742
GSE133767	10482814	Acvr1c	0.0805687500000001	-0.129284116251359	0.290421616251359	1.825055625	0.8112035782083	0.428672424920273	0.999996701290797	-4.71340176425767
GSE133767	10471953	Acvr2a	0.17467125	-0.054734738295628	0.404077238295629	2.221628125	1.60877317134486	0.126426727898721	0.999996701290797	-4.36397022048671
GSE133767	10590169	Acvr2b	-0.0319087500000008	-0.210715815062569	0.146898315062567	3.260705625	-0.377053740864415	0.710887533734253	0.999996701290797	-4.8176741975421
GSE133767	10426999	Acvrl1	0.0198449999999997	-0.273780200394649	0.313470200394648	3.64916375	0.14280253411535	0.888156899348824	0.999996701290797	-4.84304156604722
GSE133767	10596465	Acy1	-0.0067662499999992	-0.222478756460079	0.20894625646008	2.748679375	-0.06627517028158	0.947946611780776	0.999996701290797	-4.84639663041484
GSE133767	10460263	Acy3	-0.1471225	-0.438992890960297	0.144747890960297	3.77778125	-1.06504312556211	0.302030932015385	0.999996701290797	-4.62148344329082
GSE133767	10401630	Acyp1	-0.125315000000001	-0.569530028294023	0.318900028294021	2.7210525	-0.596057214029584	0.559139285580353	0.999996701290797	-4.77398265991177
GSE133767	10384936	Acyp2	0.26846875	-0.230781416602935	0.767718916602936	2.004405625	1.13619705565018	0.271934913120519	0.999996701290797	-4.59211843906088
GSE133767	10489391	Ada	-0.00990374999999988	-0.234845600554144	0.215038100554144	2.247353125	-0.0930266844306741	0.926990543228061	0.999996701290797	-4.84550252136332
GSE133767	10491678	Adad1	-0.0388674999999996	-0.327261720899065	0.249526720899065	1.800725	-0.284759479963262	0.77933347733374	0.999996701290797	-4.83036112775302
GSE133767	10575909	Adad2	0.1031475	-0.0864864031449928	0.292781403144994	3.8310175	1.14926679638813	0.26665860963998	0.999996701290797	-4.58656527926676
GSE133767	10475280	Adal	0.328858749999999	0.014821342409111	0.642896157590888	2.024923125	2.21261654429939	0.0411754113136919	0.999996701290797	-4.0147260641814
GSE133767	10586844	Adam10	-0.16602625	-0.477116120162684	0.145063620162683	2.211725625	-1.1276362439113	0.275433009370874	0.999996701290797	-4.59572940138826
GSE133767	10381619	Adam11	-0.0133200000000007	-0.24141399086823	0.214773990868229	3.21516625	-0.123386748028794	0.903275371191208	0.999996701290797	-4.84412473419574
GSE133767	10568668	Adam12	0.0144837499999995	-0.175616508379805	0.204584008379804	1.852268125	0.160981678044036	0.874041415690693	0.999996701290797	-4.84188474552147
GSE133767	10499560	Adam15	-0.00796750000000035	-0.181581096858618	0.165646096858618	3.84357375	-0.0969653288540928	0.923909448936809	0.999996701290797	-4.84534555780094
GSE133767	10399605	Adam17	0.0422274999999996	-0.163359354317968	0.247814354317968	2.49991	0.433988444886419	0.669857898481093	0.999996701290797	-4.80813212351102
GSE133767	10577666	Adam18	0.230565	0.0323330798504136	0.428796920149587	1.7998025	2.45752492428282	0.025257192762074	0.999996701290797	-3.86369243903597
GSE133767	10375402	Adam19	0.0545862499999989	-0.151683036286393	0.260855536286391	3.122816875	0.55914807140112	0.583490592409936	0.999996701290797	-4.78265345454472
GSE133767	10533323	Adam1a	-0.167032499999999	-0.495223898082513	0.161158898082514	2.86908125	-1.07535516302687	0.297524613010179	0.999996701290797	-4.61732004642965
GSE133767	10533320	Adam1b	0.0190124999999997	-0.175770484755977	0.213795484755976	2.57402125	0.206236888507875	0.83910210152863	0.999996701290797	-4.8384073104208
GSE133767	10420913	Adam2	0.17561625	-0.0437906594053772	0.395023159405377	1.722848125	1.69119052411134	0.109396777415803	0.999996701290797	-4.31929224451996
GSE133767	10571439	Adam20	0.0994287499999995	-0.194170296577904	0.393027796577903	2.807280625	0.715542569048707	0.484170335128347	0.999996701290797	-4.74241045761573
GSE133767	10401330	Adam21	0.0913737499999998	-0.165861791421749	0.348609291421748	2.058861875	0.750530961124776	0.463391418378043	0.999996701290797	-4.7321769388874
GSE133767	10528038	Adam22	-0.0288837499999999	-0.21711235509524	0.15934485509524	1.910358125	-0.324224695304104	0.749798119036473	0.999996701290797	-4.82536037242726
GSE133767	10346882	Adam23	-0.0891187499999997	-0.292519903382889	0.114282403382889	1.830756875	-0.925750195354695	0.36777634107892	0.999996701290797	-4.67451196472379
GSE133767	10571432	Adam24	-0.00768499999999928	-0.28439759721403	0.269027597214032	1.5956575	-0.0586804017380326	0.95390392062808	0.999996701290797	-4.84659578954408
GSE133767	10571436	Adam25	0.0694837499999996	-0.216166819498279	0.355134319498278	1.287343125	0.513956416112319	0.614023704545284	0.999996701290797	-4.79255810665452
GSE133767	10578421	Adam26a	0.06812375	-0.147564337763814	0.283811837763814	1.545398125	0.667345173226989	0.513678743907363	0.999996701290797	-4.75578123538247
GSE133767	10578421	Adam26b	0.06812375	-0.147564337763814	0.283811837763814	1.545398125	0.667345173226989	0.513678743907363	0.999996701290797	-4.75578123538247
GSE133767	10421143	Adam28	0.0230662500000003	-0.176762522036862	0.222895022036862	1.910146875	0.243891751400993	0.810289035077994	0.999996701290797	-4.83486632460785
GSE133767	10578743	Adam29	-0.0479362500000005	-0.302016828206641	0.20614432820664	1.892199375	-0.398630684025272	0.695221790287934	0.999996701290797	-4.81421076645635
GSE133767	10577685	Adam3	-0.0656487499999998	-0.299662960653324	0.168365460653325	2.079606875	-0.59273745003723	0.561307349640407	0.999996701290797	-4.77478375756794
GSE133767	10494632	Adam30	0.0310024999999992	-0.195494525548599	0.257499525548597	2.559435	0.289209363982474	0.775984797737214	0.999996701290797	-4.82982914388681
GSE133767	10577734	Adam32	-0.00941375000000044	-0.210656861984725	0.191829361984724	1.673074375	-0.0988370497338445	0.922445686445272	0.999996701290797	-4.84526868857454
GSE133767	10487797	Adam33	-0.0739812500000001	-0.28472739631072	0.13676489631072	3.119205625	-0.741720291514098	0.468572273587793	0.999996701290797	-4.73479524629945
GSE133767	10578421	Adam34	0.06812375	-0.147564337763814	0.283811837763814	1.545398125	0.667345173226989	0.513678743907363	0.999996701290797	-4.75578123538247
GSE133767	10571441	Adam39	-0.0691900000000003	-0.245269102206762	0.106889102206761	1.2597825	-0.830259115955616	0.418117284098654	0.999996701290797	-4.70724026749343
GSE133767	10401320	Adam4	0.0541699999999996	-0.293972435945047	0.402312435945046	2.3705875	0.328760785258946	0.74642789040662	0.999996701290797	-4.82474485638787
GSE133767	10577712	Adam5	0.0401800000000003	-0.133862557214928	0.214222557214928	1.4150075	0.487789686789389	0.632048186951798	0.999996701290797	-4.79793070436465
GSE133767	10399027	Adam6a	-0.0778275000000002	-0.368760400822411	0.213105400822411	1.530435	-0.565221118538885	0.579446903325704	0.999996701290797	-4.78126248889917
GSE133767	10399024	Adam6b	0.00138625000000014	-0.15930880556006	0.16208130556006	1.510000625	0.0182270834651106	0.985673941955998	0.999996701290797	-4.84724882621972
GSE133767	10421106	Adam7	-0.00577375000000035	-0.202762097363211	0.19121459736321	1.702629375	-0.0619292151132842	0.951355197663715	0.999996701290797	-4.84651355611851
GSE133767	10568873	Adam8	-0.00508374999999894	-0.22995534212642	0.219787842126422	2.962993125	-0.0477669737750216	0.96246920871499	0.999996701290797	-4.84683961006525
GSE133767	10577757	Adam9	0.0721400000000001	-0.14892297513298	0.29320297513298	2.4891425	0.689506341254572	0.499984994487865	0.999996701290797	-4.74973874133106
GSE133767	10421128	Adamdec1	-0.0144712499999988	-0.225799033522079	0.196856533522081	1.971864375	-0.144686358225097	0.886692287776293	0.999996701290797	-4.84292809301716
GSE133767	10440522	Adamts1	0.137067500000001	-0.0505224585931511	0.324657458593153	2.31559	1.54384267441912	0.141384898355154	0.999996701290797	-4.39828417648172
GSE133767	10443949	Adamts10	-0.00702874999999992	-0.263175314654712	0.249117814654712	3.259695625	-0.0579785965054109	0.954454561681063	0.999996701290797	-4.84661297204647
GSE133767	10423109	Adamts12	-0.0354112500000006	-0.242102351189342	0.171279851189341	2.020408125	-0.361990868801487	0.721903911416652	0.999996701290797	-4.8199808789285
GSE133767	10470349	Adamts13	0.0103800000000005	-0.19024896441389	0.211008964413891	3.03281	0.109315528635946	0.914256535661872	0.999996701290797	-4.84481126311015
GSE133767	10369431	Adamts14	0.150927500000001	-0.0491648569954188	0.35101985699542	2.55825875	1.59373465242833	0.129766257242825	0.999996701290797	-4.37198960222592
GSE133767	10591988	Adamts15	0.00629875000000002	-0.279613982999006	0.292211482999006	3.170223125	0.0465477841464936	0.963426390514808	0.999996701290797	-4.84686374530832
GSE133767	10410477	Adamts16	-0.0588662499999999	-0.246006095168293	0.128273595168293	2.467739375	-0.664627400564931	0.515372671376	0.999996701290797	-4.7565098317785
GSE133767	10554057	Adamts17	0.0929262499999997	-0.136671589476284	0.322524089476284	4.442826875	0.855162704274175	0.404577117799716	0.999996701290797	-4.69900026473934
GSE133767	10581961	Adamts18	0.0355224999999999	-0.187246588136968	0.258291588136968	2.52580625	0.336919954243179	0.740379137818202	0.999996701290797	-4.82361664147344
GSE133767	10455919	Adamts19	-0.0446524999999984	-0.229322275307454	0.140017275307457	3.0888175	-0.510890815944886	0.616122571252929	0.999996701290797	-4.79320135137024
GSE133767	10375751	Adamts2	-0.0637949999999998	-0.245720203709793	0.118130203709793	4.224985	-0.740921008410058	0.469043995355752	0.999996701290797	-4.73503140149492
GSE133767	10431749	Adamts20	-0.10428375	-0.313650264292223	0.105082764292223	1.836170625	-1.05241627234021	0.307616088731658	0.999996701290797	-4.62653799387792
GSE133767	10531185	Adamts3	-0.0474037499999991	-0.303005570410561	0.208198070410563	4.589195625	-0.39185635440649	0.700125357615579	0.999996701290797	-4.81531829971921
GSE133767	10351551	Adamts4	-0.0305575000000005	-0.205911765369717	0.144796765369716	3.57834375	-0.368196472502998	0.717357582281326	0.999996701290797	-4.81904166535888
GSE133767	10440534	Adamts5	-0.15598875	-0.35544444196732	0.04346694196732	2.175741875	-1.65243726594539	0.117141887639687	0.999996701290797	-4.34045012922604
GSE133767	10406982	Adamts6	0.0177512499999999	-0.273577108708231	0.309079608708231	2.215521875	0.128743204734558	0.899100376357528	0.999996701290797	-4.84384163931601
GSE133767	10587748	Adamts7	-0.0803550000000004	-0.362017538096364	0.201307538096363	3.61045125	-0.602784330535656	0.554759609159547	0.999996701290797	-4.77234653732584
GSE133767	10584047	Adamts8	-0.0857250000000005	-0.311943302711863	0.140493302711862	2.29346875	-0.800677992181243	0.43457466046532	0.999996701290797	-4.71675132394206
GSE133767	10546430	Adamts9	0.0956025000000005	-0.160510308706528	0.351715308706529	4.00809	0.788707712257035	0.441348968808844	0.999996701290797	-4.72051376457257
GSE133767	10505734	Adamtsl1	0.119726249999999	-0.176667167120865	0.416119667120864	2.925359375	0.85349103461322	0.405476957858065	0.999996701290797	-4.69955998765658
GSE133767	10470392	Adamtsl2	0.21333	-0.00492481927257013	0.431584819272571	2.57753875	2.06521955450609	0.054803672576336	0.999996701290797	-4.10382466969968
GSE133767	10554599	Adamtsl3	0.0116975000000001	-0.262554645231978	0.285949645231978	1.94314125	0.0901199947527926	0.929265137364467	0.999996701290797	-4.84561419256015
GSE133767	10500183	Adamtsl4	-0.0721299999999996	-0.31438033092082	0.170120330920821	4.2896425	-0.629114493386631	0.537795294679313	0.999996701290797	-4.76577867643313
GSE133767	10370798	Adamtsl5	-0.00449374999999952	-0.252076448737415	0.243088948737416	3.453339375	-0.0383501222234111	0.969863768564666	0.999996701290797	-4.84700982998964
GSE133767	10535065	Adap1	-0.0490499999999998	-0.256979318337532	0.158879318337532	2.4126875	-0.498426838144535	0.624691253373348	0.999996701290797	-4.79577891943205
GSE133767	10379389	Adap2	-0.0709475000000004	-0.239001877311879	0.097106877311878	2.9553325	-0.892001130787947	0.385079448776401	0.999996701290797	-4.68642688056434
GSE133767	10493565	Adar	-0.0252849999999998	-0.210493299033406	0.159923299033406	2.82383875	-0.288456714129209	0.776550873324395	0.999996701290797	-4.82991969363215
GSE133767	10370303	Adarb1	-0.00803250000000011	-0.255567494549836	0.239502494549836	3.47428875	-0.068563387528158	0.946152348677269	0.999996701290797	-4.84633188408558
GSE133767	10403396	Adarb2	-0.0680975000000004	-0.347594403317861	0.211399403317861	2.19419375	-0.51479261151607	0.613451800263154	0.999996701290797	-4.79238201598482
GSE133767	10581926	Adat1	0.0445575000000002	-0.141819681423287	0.230934681423288	2.08557375	0.505133548756836	0.620073558282161	0.999996701290797	-4.79439949081888
GSE133767	10361799	Adat2	0.271997500000001	0.0117024859740864	0.532292514025915	3.55771625	2.20788881999187	0.0415590433684762	0.999996701290797	-4.01760970940775
GSE133767	10364814	Adat3	0.0188899999999999	-0.213732069814755	0.251512069814755	2.6554725	0.171577043280555	0.865834304106023	0.999996701290797	-4.84114697211236
GSE133767	10397561	Adck1	0.0828887499999995	-0.130832996455459	0.296610496455458	2.531195625	0.819454818282468	0.424081299970656	0.999996701290797	-4.71074913897519
GSE133767	10537441	Adck2	-0.0161774999999995	-0.264970107956447	0.232615107956448	2.76383375	-0.137389035011526	0.89236802090366	0.999996701290797	-4.8433594051292
GSE133767	10360631	Adck3	0.0449187500000003	-0.177912920575745	0.267750420575746	3.585181875	0.425920833080494	0.675610503135694	0.999996701290797	-4.80956301714387
GSE133767	10551319	Adck4	0.0331112499999997	-0.219576523002207	0.285799023002206	2.487173125	0.276865910364968	0.785284619084479	0.999996701290797	-4.83128481919696
GSE133767	10424929	Adck5	0.0539300000000007	-0.152025571542155	0.259885571542156	3.16869875	0.55326731251293	0.587419888276901	0.999996701290797	-4.7839869021331
GSE133767	10374202	Adcy1	0.00382749999999943	-0.231951370902772	0.239606370902771	2.5160225	0.034299552428469	0.97304537992461	0.999996701290797	-4.84707160149146
GSE133767	10351310	Adcy10	-0.0347962499999994	-0.239287836836498	0.169695336836499	1.695904375	-0.359529999945628	0.723709771476113	0.999996701290797	-4.82034901992632
GSE133767	10410408	Adcy2	-0.0689875000000002	-0.295217179135647	0.157242179135647	1.81134625	-0.644316072220381	0.528131963440305	0.999996701290797	-4.7618684765828
GSE133767	10394258	Adcy3	-0.0667512500000003	-0.223346552319535	0.0898440523195345	2.946066875	-0.900655717851097	0.380591161788375	0.999996701290797	-4.68340723283926
GSE133767	10420171	Adcy4	-0.2173675	-0.412203993983329	-0.0225310060166717	3.87948625	-2.35723261673422	0.0309116227936909	0.999996701290797	-3.92587467083244
GSE133767	10435388	Adcy5	0.0371537499999999	-0.176558345762364	0.250865845762363	2.439671875	0.367326016019132	0.717994639058356	0.999996701290797	-4.8191743462406
GSE133767	10432190	Adcy6	0.116512500000001	-0.110442661945165	0.343467661945167	2.81519375	1.0847023806192	0.293482483270719	0.999996701290797	-4.61351882654935
GSE133767	10573747	Adcy7	0.0251375000000005	-0.230955584962354	0.281230584962355	2.87245875	0.207396951794805	0.838210677442372	0.999996701290797	-4.83830698587758
GSE133767	10429029	Adcy8	0.11104875	-0.12787536940898	0.34997286940898	1.861584375	0.982045969582748	0.34010741782423	0.999996701290797	-4.65381387768291
GSE133767	10437364	Adcy9	0.0306962499999992	-0.197809932959524	0.259202432959522	2.641491875	0.283834710459422	0.78002996008361	0.999996701290797	-4.83047066489513
GSE133767	10447502	Adcyap1	-0.0545637500000002	-0.294792119162033	0.185664619162033	2.671899375	-0.47990807187629	0.63752515364386	0.999996701290797	-4.79949648137062
GSE133767	10538482	Adcyap1r1	-0.0737199999999993	-0.252844168965691	0.105404168965693	3.093885	-0.869579464768589	0.396870959353117	0.999996701290797	-4.69413392182183
GSE133767	10521222	Add1	0.0552800000000007	-0.241984723576771	0.352544723576772	3.1503	0.392918789239624	0.699355408922388	0.999996701290797	-4.81514582045445
GSE133767	10539669	Add2	0.0178425	-0.181925328534932	0.217610328534932	3.93033625	0.188715813621678	0.8525925038401	0.999996701290797	-4.83985464678111
GSE133767	10463911	Add3	0.0360600000000004	-0.20502567108129	0.27714567108129	2.250785	0.31603301964351	0.755897572294535	0.999996701290797	-4.82645068797574
GSE133767	10367805	Adgb	-0.00100000000000011	-0.200750147811243	0.198750147811243	1.8409525	-0.010577694698062	0.991685857646567	0.999996701290797	-4.84729508302462
GSE133767	10496438	Adh1	0.44736875	-0.197943748760838	1.09268124876084	5.424841875	1.4647843947762	0.161573168555117	0.999996701290797	-4.43892070392804
GSE133767	10496466	Adh4	-0.138199999999999	-0.412388916602504	0.135988916602506	3.33232875	-1.06496732908393	0.302064237462034	0.999996701290797	-4.62151392772612
GSE133767	10496475	Adh5	0.022203750000001	-0.356623656414058	0.40103115641406	3.139608125	0.123840607964323	0.902921503050555	0.999996701290797	-4.8441012121994
GSE133767	10496462	Adh6-ps1	-0.15264	-0.420239942877383	0.114959942877383	2.039805	-1.20520376087478	0.244944592628832	0.999996701290797	-4.5622579465436
GSE133767	10496447	Adh6a	0.0407925	-0.167755974222893	0.249340974222893	1.63083875	0.413286712557923	0.684660854594255	0.999996701290797	-4.81175172105583
GSE133767	10496457	Adh6b	-0.0935650000000003	-0.403133347866306	0.216003347866305	2.57357625	-0.638608963207599	0.531748502047547	0.999996701290797	-4.76334658461073
GSE133767	10496425	Adh7	-0.111947499999999	-0.312492017025767	0.0885970170257684	2.28938625	-1.17945599990001	0.254765813269419	0.999996701290797	-4.57355429208108
GSE133767	10344725	Adhfe1	-0.0986012499999998	-0.299281238049096	0.102078738049097	3.340511875	-1.03814135419372	0.314019663658635	0.999996701290797	-4.63219421641522
GSE133767	10395058	Adi1	-0.00190625000000022	-0.423571162815326	0.419758662815326	3.661991875	-0.00955191676855664	0.992492098920205	0.999996701290797	-4.84729941791518
GSE133767	10478109	Adig	-0.130995	-0.374439620201392	0.112449620201391	2.67593875	-1.1369272473438	0.271638087545817	0.999996701290797	-4.59180947267377
GSE133767	10434747	Adipoq	0.0778862499999997	-0.162640653890641	0.31841315389064	2.162168125	0.684187712914204	0.503252069377036	0.999996701290797	-4.75120535749229
GSE133767	10350015	Adipor1	0.14391375	-0.0779239195595237	0.365751419559524	4.530448125	1.37070858504893	0.188629431148334	0.999996701290797	-4.48550238127045
GSE133767	10547386	Adipor2	0.0479737500000001	-0.212422917134968	0.308370417134968	2.620073125	0.389265920360223	0.702004060395718	0.999996701290797	-4.81573693912757
GSE133767	10413086	Adk	-0.0319149999999997	-0.276627574478243	0.212797574478243	2.12022375	-0.275560332439384	0.786270257614939	0.999996701290797	-4.83143513029092
GSE133767	10556297	Adm	0.0708487499999997	-0.135190913342537	0.276888413342537	2.499978125	0.726539947113711	0.47758030722102	0.999996701290797	-4.73924129583109
GSE133767	10426208	Adm2	0.226652499999999	-0.0875152556352808	0.540820255635279	4.33374	1.52432313646214	0.146162388378652	0.999996701290797	-4.40843759265471
GSE133767	10489936	Adnp	-0.315695	-0.635333339839568	0.00394333983956824	3.69078625	-2.08682953407141	0.052576496529935	0.999996701290797	-4.0908758348077
GSE133767	10459912	Adnp2	-0.167227500000001	-0.475364138353447	0.140909138353445	2.894055	-1.14668067715868	0.267696491434194	0.999996701290797	-4.58766793691409
GSE133767	10369779	Ado	0.0476075000000007	-0.245711126456219	0.34092612645622	3.78557625	0.342936626007105	0.735929890302161	0.999996701290797	-4.82276735174254
GSE133767	10357878	Adora1	0.0461724999999995	-0.178516946831007	0.270861946831006	2.70076875	0.434189035595031	0.669715134630249	0.999996701290797	-4.80809621627649
GSE133767	10364030	Adora2a	-0.156292499999999	-0.349327664173101	0.0367426641731022	2.93415875	-1.71072359748778	0.10566316994027	0.999996701290797	-4.30853105268045
GSE133767	10376832	Adora2b	0.29217	0.0398985692179212	0.544441430782078	2.56588625	2.44706602573325	0.0257978529732095	0.999996701290797	-3.8701927399932
GSE133767	10495107	Adora3	0.0580150000000001	-0.227828477231477	0.343858477231478	2.3707225	0.428834924749526	0.673530200529787	0.999996701290797	-4.80904915463205
GSE133767	10585860	Adpgk	-0.0196775000000011	-0.211245861242197	0.171890861242194	2.33222125	-0.217032250699351	0.830815527299868	0.999996701290797	-4.83745214612517
GSE133767	10439455	Adprh	-0.0317037500000001	-0.21390888462338	0.150501384623379	5.959310625	-0.367644573886483	0.717761472778146	0.999996701290797	-4.81912582498332
GSE133767	10577125	Adprhl1	-0.00276375000000018	-0.140233134116688	0.134705634116688	2.725718125	-0.0424786695384881	0.966621447359541	0.999996701290797	-4.84693978313974
GSE133767	10516325	Adprhl2	0.284870000000001	0.0822898218712133	0.487450178128789	3.32157375	2.97117275594152	0.00869850651910339	0.999996701290797	-3.54384610670567
GSE133767	10387111	Adprm	0.0178750000000003	-0.18112021400699	0.216870214006991	1.71320875	0.18979359683827	0.851761254443501	0.999996701290797	-4.83976929601407
GSE133767	10416099	Adra1a	0.0136987499999996	-0.273068479522496	0.300465979522495	2.613108125	0.10093215747288	0.920807566739472	0.999996701290797	-4.84518090525759
GSE133767	10385353	Adra1b	-0.0747637499999998	-0.235371417960098	0.0858439179600981	2.404379375	-0.983564709366599	0.339381647827775	0.999996701290797	-4.6532414759889
GSE133767	10487886	Adra1d	-0.0988312499999999	-0.373576954484847	0.175914454484847	4.694274375	-0.760048864249511	0.457834035407536	0.999996701290797	-4.72931739955824
GSE133767	10464030	Adra2a	-0.0229412500000019	-0.314094080524752	0.268211580524748	3.000333125	-0.166484650329831	0.869776933186093	0.999996701290797	-4.84150740052783
GSE133767	10475800	Adra2b	0.0658099999999999	-0.138053384266134	0.269673384266134	2.533735	0.682072906267532	0.504554546821148	0.999996701290797	-4.75178563924347
GSE133767	10521383	Adra2c	-0.00172624999999993	-0.243077607919637	0.239625107919637	2.555510625	-0.0151123527481763	0.988121829004637	0.999996701290797	-4.84727062643025
GSE133767	10464167	Adrb1	0.0217999999999998	-0.205636136884061	0.249236136884061	3.83910125	0.202523377167933	0.841957174760687	0.999996701290797	-4.83872470864726
GSE133767	10459288	Adrb2	-0.0894124999999995	-0.394162820056657	0.215337820056658	2.4740125	-0.619915085463379	0.543689953853747	0.999996701290797	-4.76810301195032
GSE133767	10577973	Adrb3	-0.0881062500000001	-0.309066959114048	0.132854459114048	3.742976875	-0.842499786254135	0.411425889506215	0.999996701290797	-4.70321654207424
GSE133767	10464704	Adrbk1	-0.0140037499999992	-0.275449857457852	0.247442357457854	2.508185625	-0.113172342706323	0.911244804877437	0.999996701290797	-4.84463132965305
GSE133767	10532630	Adrbk2	0.0136912500000002	-0.154961802272825	0.182344302272825	1.848944375	0.17152484380084	0.865874699649833	0.999996701290797	-4.84115072145313
GSE133767	10479351	Adrm1	0.105228750000001	-0.0940104062712899	0.304467906271292	4.301208125	1.11593231712253	0.280269528423996	0.999996701290797	-4.60063203766213
GSE133767	10425461	Adsl	0.13011875	-0.15420642954898	0.41444392954898	2.484565625	0.966947061012067	0.347381887444709	0.999996701290797	-4.65946482651671
GSE133767	10360522	Adss	0.225572500000001	-0.55931586623048	1.01046086623048	4.374975	0.607234444266808	0.551872466974772	0.999996701290797	-4.77125481396966
GSE133767	10398859	Adssl1	-0.0752100000000007	-0.27307343169885	0.122653431698849	3.1044075	-0.803134327400815	0.433192699435467	0.999996701290797	-4.71597308540229
GSE133767	10408861	Adtrp	0.00312625000000022	-0.19761700754992	0.20386950754992	2.117988125	0.0329049226806868	0.974140934524548	0.999996701290797	-4.84709127598607
GSE133767	10374083	Aebp1	0.0307075000000006	-0.239724013338885	0.301139013338886	2.8712775	0.239919362792957	0.813316235388519	0.999996701290797	-4.83526754322678
GSE133767	10542557	Aebp2	-0.0460674999999999	-0.25992881210272	0.16779381210272	3.184615	-0.455135335992158	0.654879904799836	0.999996701290797	-4.80425877718404
GSE133767	10554233	Aen	-0.0810425000000001	-0.3824042194434	0.2203192194434	3.3394325	-0.568202161954299	0.577467266553436	0.999996701290797	-4.78057454736977
GSE133767	10365136	Aes	0.08888125	-0.134037749917707	0.311800249917707	2.502264375	0.842444317128825	0.411456054586922	0.999996701290797	-4.70323489121291
GSE133767	10598207	AF067061	0.22111625	-0.103425019497936	0.545657519497936	1.951643125	1.43955700440869	0.168495716675039	0.999996701290797	-4.45160766309656
GSE133767	10598154	AF067063	-0.0198012500000004	-0.230880410924907	0.191277910924906	2.767118125	-0.198209919490316	0.845276355681602	0.999996701290797	-4.83908620147155
GSE133767	10392815	AF251705	-0.20316875	-0.450090262651226	0.0437527626512269	2.721238125	-1.73850569247905	0.100543132149136	0.999996701290797	-4.29311743041523
GSE133767	10398374	AF357341	0.21954375	-0.072949842426033	0.512037342426033	1.453524375	1.58592577975133	0.131529627495779	0.999996701290797	-4.37613688929453
GSE133767	10398362	AF357355	-0.0745262499999997	-0.358367676643467	0.209315176643467	1.475283125	-0.554768284892208	0.586415726020748	0.999996701290797	-4.78364782204969
GSE133767	10398370	AF357428	0.0568612499999999	-0.174154105276877	0.287876605276877	1.411659375	0.520060287997117	0.609854961994452	0.999996701290797	-4.7912664716367
GSE133767	10577219	AF366264	0.0303412500000002	-0.330619296377093	0.391301796377094	2.604343125	0.177603643427921	0.861173109036267	0.999996701290797	-4.8407064740692
GSE133767	10595657	AF529169	-0.0362987500000012	-0.33994977161584	0.267352271615838	2.277170625	-0.252577732673004	0.803680642874522	0.999996701290797	-4.83396633976413
GSE133767	10521440	Afap1	-0.14327	-0.42437289234207	0.13783289234207	2.9439225	-1.07688191601024	0.296861617838227	0.999996701290797	-4.61670093707708
GSE133767	10459241	Afap1l1	-0.0425612499999999	-0.28342449140009	0.19830199140009	3.328140625	-0.373355011492532	0.713586646690981	0.999996701290797	-4.81824908963606
GSE133767	10468668	Afap1l2	0.152898749999999	-0.0440000303035572	0.349797530303556	2.780615625	1.6407372809938	0.1195707432396	0.999996701290797	-4.34678624687014
GSE133767	10523670	Aff1	0.08700375	-0.270288511392221	0.444296011392221	4.502484375	0.51450843507009	0.613646130020533	0.999996701290797	-4.79244188993729
GSE133767	10599927	Aff2	-0.0238187499999989	-0.194220532974734	0.146583032974737	2.187271875	-0.29534047480957	0.771378394641318	0.999996701290797	-4.82908287634226
GSE133767	10354111	Aff3	-0.00940999999999947	-0.236512417078032	0.217692417078033	2.46380625	-0.0875479546335974	0.93127838275112	0.999996701290797	-4.84571005554107
GSE133767	10375980	Aff4	-0.1323225	-0.369243767185114	0.104598767185113	2.23571375	-1.18007004940267	0.254528156310783	0.999996701290797	-4.57328701140012
GSE133767	10576354	Afg3l1	0.0939725000000005	-0.160045948805083	0.347990948805084	3.307065	0.781652386900132	0.445372548321523	0.999996701290797	-4.72270789016328
GSE133767	10459534	Afg3l2	0.0425825	-0.342837881794768	0.428002881794768	2.43746125	0.233439645521022	0.8182606936853	0.999996701290797	-4.83590802102374
GSE133767	10523095	Afm	0.00473374999999976	-0.302453651323929	0.311921151323929	2.542481875	0.0325596745600282	0.974412153294213	0.999996701290797	-4.8470960204453
GSE133767	10382985	Afmid	-0.0748425000000008	-0.358032860077497	0.208347860077495	2.8404125	-0.558403276093879	0.583987495540847	0.999996701290797	-4.7828230689167
GSE133767	10523078	Afp	0.0130375000000003	-0.215750120155202	0.241825120155203	2.01220875	0.120403729087311	0.905601707406488	0.999996701290797	-4.84427719073894
GSE133767	10384555	Aftph	-0.17190625	-0.533342578558983	0.189530078558984	2.831586875	-1.0049350686588	0.329284268438423	0.999996701290797	-4.6451103024579
GSE133767	10571774	Aga	-0.1348875	-0.362961125608923	0.0931861256089216	2.019975	-1.249610818237	0.228691583037721	0.999996701290797	-4.54235428286555
GSE133767	10348432	Agap1	-0.1252475	-0.335890336878891	0.0853953368788914	2.9624375	-1.25632067831385	0.226310279999252	0.999996701290797	-4.53930143031693
GSE133767	10366825	Agap2	0.0292712500000007	-0.161304953092735	0.219847453092736	2.856171875	0.32452692603604	0.74957340417248	0.999996701290797	-4.82531962232455
GSE133767	10520211	Agap3	-0.0988225000000003	-0.279134252562364	0.0814892525623635	2.2793625	-1.15800367886851	0.263174612167099	0.999996701290797	-4.58282611275662
GSE133767	10554204	Agbl1	0.1882725	0.0234903092417264	0.353054690758274	2.3995525	2.41409721090485	0.0275744054849205	0.999996701290797	-3.89066136657199
GSE133767	10473708	Agbl2	-0.0572637500000006	-0.236919370364917	0.122391870364916	2.161799375	-0.673468231181778	0.509873998956157	0.999996701290797	-4.75412975341757
GSE133767	10537204	Agbl3	0.0714700000000008	-0.125950243505656	0.268890243505657	1.91607125	0.764909819358223	0.455011604123575	0.999996701290797	-4.72784458261502
GSE133767	10507015	Agbl4	-0.0233087500000004	-0.26335901213735	0.216741512137349	2.732229375	-0.205161061075892	0.839928998068178	0.999996701290797	-4.83849985125301
GSE133767	10520574	Agbl5	-0.0734650000000001	-0.244932774148693	0.0980027741486931	2.72318125	-0.905265792634843	0.378214744130403	0.999996701290797	-4.68178862549878
GSE133767	10444407	Ager	0.0669737500000003	-0.132034482964582	0.265981982964583	3.449960625	0.711068942688264	0.486866434810638	0.999996701290797	-4.74368714051748
GSE133767	10347873	Agfg1	0.135362499999999	-0.187546716824322	0.45827171682432	2.69237375	0.885719207292798	0.388359311685498	0.999996701290797	-4.68860310760902
GSE133767	10534889	Agfg2	-0.149527499999999	-0.367976922020726	0.0689219220207278	3.93003125	-1.4462664428037	0.166631275032126	0.999996701290797	-4.44824711779071
GSE133767	10411199	Aggf1	-0.0700849999999993	-0.366661850099764	0.226491850099766	2.84254875	-0.499305059304958	0.624085659544935	0.999996701290797	-4.79559928706691
GSE133767	10537463	Agk	0.0612099999999991	-0.123224436083995	0.245644436083993	3.6284925	0.701226797817804	0.492829030556454	0.999996701290797	-4.7464703501803
GSE133767	10501699	Agl	0.0449237500000002	-0.206803634523925	0.296651134523925	2.611788125	0.377071471299202	0.710874604611216	0.999996701290797	-4.81767142842756
GSE133767	10510025	Agmat	0.0102175	-0.200371952277435	0.220806952277435	3.95711125	0.102514705547719	0.919570449252312	0.999996701290797	-4.84511337948893
GSE133767	10395414	Agmo	0.0176949999999998	-0.189329604555535	0.224719604555534	2.10508	0.180595423456821	0.858861104552603	0.999996701290797	-4.84048218438856
GSE133767	10516371	Ago1	-0.117265	-0.344573494766192	0.110043494766191	2.581295	-1.09001099589511	0.291204797984681	0.999996701290797	-4.6113484590231
GSE133767	10429327	Ago2	-0.154945	-0.679367876942941	0.369477876942941	4.5374875	-0.624272314238549	0.540893621914431	0.999996701290797	-4.7670060625076
GSE133767	10516348	Ago3	-0.0737550000000002	-0.363372719108972	0.215862719108971	2.057515	-0.538077058332373	0.597630885737845	0.999996701290797	-4.78736971411414
GSE133767	10516393	Ago4	-0.0577675	-0.260253730922015	0.144718730922015	1.75072625	-0.602790242641487	0.554755768162376	0.999996701290797	-4.77234509189976
GSE133767	10444420	Agpat1	-0.19768875	-0.435127574824606	0.0397500748246061	3.314273125	-1.75917222102541	0.096875682079082	0.999996701290797	-4.28157175111571
GSE133767	10481092	Agpat2	-0.0731687499999998	-0.337014310132094	0.190676810132094	2.695415625	-0.585941127586589	0.565759688611733	0.999996701290797	-4.77641075196293
GSE133767	10370471	Agpat3	-0.0617762500000003	-0.357775363095937	0.234222863095937	3.407083125	-0.440970228127648	0.664896540400685	0.999996701290797	-4.80687292610609
GSE133767	10441740	Agpat4	0.0979449999999997	-0.142430788710389	0.338320788710388	1.99892375	0.860933655635645	0.401480716449156	0.999996701290797	-4.69706071533342
GSE133767	10570573	Agpat5	-0.0810475000000004	-0.297326297515236	0.135231297515235	2.64293625	-0.791778699372227	0.439604739149296	0.999996701290797	-4.71955327767089
GSE133767	10577604	Agpat6	0.0610874999999993	-0.18924040206759	0.311415402067589	3.7752025	0.515609878829771	0.612893089736749	0.999996701290797	-4.7922096486005
GSE133767	10523547	Agpat9	0.1650075	-0.110938017394866	0.440953017394866	4.08741875	1.26345121718095	0.223800895387264	0.999996701290797	-4.53604430492803
GSE133767	10473024	Agps	-0.25178375	-1.08104292881333	0.577475428813329	2.928265625	-0.641527898434536	0.529897090540889	0.999996701290797	-4.76259211300637
GSE133767	10395365	Agr2	-0.0682400000000001	-0.278641770826452	0.142161770826452	1.64848375	-0.685279538734987	0.502580390140415	0.999996701290797	-4.75090513011557
GSE133767	10395356	Agr3	-0.0550987500000002	-0.249378847576683	0.139181347576682	1.608465625	-0.599227271908729	0.55707314258454	0.999996701290797	-4.77321379288218
GSE133767	10519270	Agrn	0.0966037500000003	-0.134814140683328	0.328021640683329	2.671636875	0.882013417508402	0.390302835283185	0.999996701290797	-4.68988072604565
GSE133767	10581299	Agrp	-0.153690000000001	-0.448707410917056	0.141327410917055	2.40876625	-1.10071808114542	0.286650417454507	0.999996701290797	-4.60694573981913
GSE133767	10582658	Agt	-0.0977062499999994	-0.229123082901782	0.0337105829017827	3.867408125	-1.57090342236492	0.134978946939031	0.999996701290797	-4.38408241748956
GSE133767	10409737	Agtpbp1	0.0251625	-0.232335710326894	0.282660710326894	1.4966725	0.206470357721754	0.838922679289501	0.999996701290797	-4.8383871644059
GSE133767	10404376	Agtr1a	-0.0660974999999993	-0.299605263708172	0.167410263708174	3.40851375	-0.598083534324413	0.557818125925228	0.999996701290797	-4.77349163394978
GSE133767	10497475	Agtr1b	-0.0329337500000015	-0.280102009886044	0.214234509886041	4.164646875	-0.281531258456641	0.781765623801359	0.999996701290797	-4.83074197897523
GSE133767	10599001	Agtr2	-0.0921374999999998	-0.311591104643216	0.127316104643217	2.18725625	-0.887098495538002	0.387637581942947	0.999996701290797	-4.68812641074491
GSE133767	10518455	Agtrap	-0.00186249999999966	-0.283955509659169	0.28023050965917	3.14000125	-0.013950253332086	0.989035163095637	0.999996701290797	-4.84727771669811
GSE133767	10348702	Agxt	0.00990750000000062	-0.265790131629841	0.285605131629842	2.0074775	0.0759292627335933	0.940378609395908	0.999996701290797	-4.8461085550167
GSE133767	10423053	Agxt2	-0.1208425	-0.388192058806746	0.146507058806747	2.24207125	-0.95503297487868	0.353197739817856	0.999996701290797	-4.66387258587426
GSE133767	10360589	Ahctf1	0.0851512499999996	-0.144527684516526	0.314830184516525	3.120724375	0.78333584515761	0.444410420277521	0.999996701290797	-4.7221859393792
GSE133767	10488816	Ahcy	-0.16927875	-0.670274947484154	0.331717447484155	3.304493125	-0.713914414926853	0.48515054285804	0.999996701290797	-4.74287593832622
GSE133767	10501143	Ahcyl1	0.0532874999999997	-0.187092264946262	0.293667264946262	2.669505	0.468387802352336	0.645569606957484	0.999996701290797	-4.80174121255526
GSE133767	10536931	Ahcyl2	-0.0334412500000005	-0.237317560650753	0.170435060650752	2.476275625	-0.34657232020256	0.733246012603735	0.999996701290797	-4.8222470292848
GSE133767	10508788	Ahdc1	-0.0103974999999998	-0.2147637304614	0.1939687304614	4.1519075	-0.107497392971315	0.9156767611323	0.999996701290797	-4.84489392673747
GSE133767	10362005	Ahi1	0.0796275000000004	-0.204707763322208	0.363962763322209	2.1381125	0.591712159089261	0.561977841067739	0.999996701290797	-4.77503032798409
GSE133767	10461369	Ahnak	0.0486100000000014	-0.117539263360502	0.214759263360505	3.64504625	0.618166318310561	0.544814462940388	0.999996701290797	-4.76854126704924
GSE133767	10402783	Ahnak2	-0.0562800000000006	-0.333865382994008	0.221305382994007	3.0325275	-0.428386358345977	0.673850244707904	0.999996701290797	-4.80912847373738
GSE133767	10400006	Ahr	-0.0393324999999995	-0.215476835791373	0.136811835791374	2.1992275	-0.471803334868502	0.643179798434612	0.999996701290797	-4.80108114007507
GSE133767	10410604	Ahrr	0.0741862499999999	-0.124071105806077	0.272443605806077	2.009966875	0.790628101217417	0.440257738142776	0.999996701290797	-4.71991352695357
GSE133767	10397518	Ahsa1	-0.291375	-1.25773645079837	0.674986450798372	5.05676625	-0.637075386893967	0.532722645956994	0.999996701290797	-4.76374170286722
GSE133767	10384672	Ahsa2	0.0476674999999993	-0.317010742452579	0.412345742452578	3.4051725	0.27617900423493	0.785803148159321	0.999996701290797	-4.83136398992372
GSE133767	10434689	Ahsg	-0.0771812500000002	-0.384231719672053	0.229869219672053	1.978271875	-0.531104742179492	0.602347065023635	0.999996701290797	-4.78889262327873
GSE133767	10585517	AI118078	0.00595000000000034	-0.242231031736904	0.254131031736904	2.53493375	0.050655489602425	0.960201682881559	0.999996701290797	-4.84677993932718
GSE133767	10482004	AI182371	0.00126124999999977	-0.22403114756792	0.22655364756792	2.273691875	0.0118285845814643	0.99070269544244	0.999996701290797	-4.84728919896313
GSE133767	10513268	AI314180	0.0264674999999994	-0.232789275918582	0.285724275918581	2.47629625	0.21570536308812	0.83183296757942	0.999996701290797	-4.83757215125666
GSE133767	10368713	AI317395	-0.16500125	-0.494657927760213	0.164655427760212	3.303400625	-1.05755629340312	0.30533358526675	0.999996701290797	-4.62448622775566
GSE133767	10449356	AI413582	0.0915587500000008	-0.217906817382978	0.401024317382979	3.930278125	0.625123258620907	0.540348429945335	0.999996701290797	-4.76679100291267
GSE133767	10512999	AI427809	0.0953437500000001	-0.142512073361607	0.333199573361608	2.953878125	0.846947670765374	0.409011718759206	0.999996701290797	-4.70174177381712
GSE133767	10571362	AI429214	-0.101485	-0.402433871015479	0.19946387101548	2.18707125	-0.712503947592227	0.486000643177619	0.999996701290797	-4.74327840816957
GSE133767	10512251	AI464131	0.210978750000001	-0.0304389777572313	0.452396477757233	3.208035625	1.84649312153411	0.0826408736329397	0.999996701290797	-4.23208100144172
GSE133767	10557571	AI467606	0.0292737499999998	-0.256321268518452	0.314868768518452	2.212170625	0.216573776133654	0.831167044753921	0.999996701290797	-4.83749369351744
GSE133767	10513332	AI481877	0.0706812499999998	-0.153200860340804	0.294563360340804	1.818046875	0.667057031879733	0.513858185963268	0.999996701290797	-4.75585861113437
GSE133767	10495186	AI504432	0.0500512499999999	-0.187109087077206	0.287211587077206	1.806509375	0.445913896056053	0.661393148053315	0.999996701290797	-4.80596961126897
GSE133767	10510022	AI507597	0.0548262499999987	-0.234745839702768	0.344398339702765	3.535719375	0.4000460430917	0.694199036101661	0.999996701290797	-4.81397704476158
GSE133767	10593499	AI593442	-0.0290187500000005	-0.223528365049864	0.165490865049863	2.223229375	-0.315221451081111	0.7565027727408	0.999996701290797	-4.82655721845914
GSE133767	10345904	AI597479	0.0358462499999992	-0.398021655042883	0.469714155042881	3.574563125	0.174567881623171	0.863520430744133	0.999996701290797	-4.8409302543112
GSE133767	10463158	AI606181	-0.0242275000000007	-0.320401146390486	0.271946146390484	1.98028125	-0.172838435790941	0.8648582685728	0.999996701290797	-4.84105602495853
GSE133767	10360377	AI607873	0.18088375	-0.0308010282321006	0.392568528232101	2.605030625	1.80546078655845	0.0890826597171891	0.999996701290797	-4.25547501634963
GSE133767	10445678	AI661453	-0.0446174999999998	-0.289927916147219	0.200692916147219	3.0751975	-0.38429734173143	0.705613066134514	0.999996701290797	-4.81653236206671
GSE133767	10502606	AI747448	0.0301612500000021	-0.201041637754821	0.261364137754825	3.002233125	0.275634908780159	0.786213946543374	0.999996701290797	-4.83142656317565
GSE133767	10460582	AI837181	-0.259339999999999	-0.538854982776948	0.0201749827769495	2.38677875	-1.96039032969906	0.0668711655810775	0.999996701290797	-4.16597992755906
GSE133767	10465673	AI846148	-0.036286249999999	-0.263354123441059	0.190781623441061	3.338259375	-0.337648273182394	0.739840047199738	0.999996701290797	-4.82351461698184
GSE133767	10538109	AI854703	-0.0505924999999996	-0.272330799857791	0.171145799857792	2.447945	-0.482084939623045	0.636010258954725	0.999996701290797	-4.7990664569903
GSE133767	10562605	AI987944	-0.0372374999999998	-0.268192393401692	0.193717393401692	1.51658375	-0.340668113150985	0.737606299267805	0.999996701290797	-4.82308929240993
GSE133767	10541507	Aicda	-0.0556274999999999	-0.35425245134653	0.24299745134653	2.50664375	-0.39358776327652	0.698870775177383	0.999996701290797	-4.81503698440033
GSE133767	10569890	Aida	0.0684849999999995	-0.126200815263887	0.263170815263886	2.95917	0.743257477717633	0.467665861854016	0.999996701290797	-4.73434042920293
GSE133767	10450484	Aif1	-0.0649874999999993	-0.283649395556374	0.153674395556375	1.95173875	-0.627964161808865	0.538530466235837	0.999996701290797	-4.76607105536773
GSE133767	10471247	Aif1l	0.0621525000000003	-0.0818633714546193	0.20616837145462	2.76997375	0.911856257584543	0.374834833143302	0.999996701290797	-4.67946252775138
GSE133767	10604405	Aifm1	-0.15554625	-0.539118009195691	0.228025509195692	2.887688125	-0.856822886246162	0.403684753272723	0.999996701290797	-4.69844345136565
GSE133767	10363528	Aifm2	-0.0908462500000007	-0.271438086525305	0.0897455865253033	3.215950625	-1.06288683447725	0.30297946176327	0.999996701290797	-4.62235000502527
GSE133767	10434007	Aifm3	-0.125394999999999	-0.322041560290648	0.0712515602906497	3.243065	-1.34732386617778	0.195893966165345	0.999996701290797	-4.49676300599055
GSE133767	10367973	Aig1	0.0592712500000006	-0.199655523856925	0.318198023856926	3.685773125	0.483665670734	0.63491125983831	0.999996701290797	-4.79875302927551
GSE133767	10368947	Aim1	-0.0939487500000005	-0.354208721680851	0.16631122168085	2.947911875	-0.762714082620035	0.456285194597846	0.999996701290797	-4.72851090359956
GSE133767	10508917	Aim1l	0.13532375	-0.12743031617368	0.39807781617368	2.837560625	1.0881849517834	0.29198680226461	0.999996701290797	-4.61209595553028
GSE133767	10351867	Aim2	-0.0933075000000003	-0.356988773964247	0.170373773964247	1.86856625	-0.747679378092911	0.465064383423883	0.999996701290797	-4.73302738805559
GSE133767	10502232	Aimp1	-0.0409087500000012	-0.502396960293953	0.420579460293951	3.538014375	-0.187298257163993	0.853686078362062	0.999996701290797	-4.839966169514
GSE133767	10535502	Aimp2	0.160467500000001	-0.038030364528882	0.358965364528884	3.85247125	1.70808463069477	0.106161060679481	0.999996701290797	-4.30998862196433
GSE133767	10464603	Aip	0.0904775	-0.165506480905649	0.346461480905649	2.68261	0.746802805203585	0.465579386811121	0.999996701290797	-4.73328823253103
GSE133767	10388098	Aipl1	0.0203087499999999	-0.194288328102424	0.234905828102424	2.534700625	0.199957420822121	0.843931298157865	0.999996701290797	-4.8389406812396
GSE133767	10370397	Aire	-0.183735	-0.387098888112726	0.0196288881127265	3.3925625	-1.90895721339027	0.0736249619118373	0.999996701290797	-4.19603038977221
GSE133767	10441791	Airn	0.0756825000000001	-0.181459719137197	0.332824719137197	2.62919	0.621870877791904	0.542433816884765	0.999996701290797	-4.76761151457401
GSE133767	10518947	Ajap1	0.0450287500000006	-0.17969275916584	0.269750259165841	3.588846875	0.423373221772314	0.677431403885325	0.999996701290797	-4.810009484009
GSE133767	10419790	Ajuba	0.0251762500000001	-0.168849092723102	0.219201592723102	1.916654375	0.274164184809163	0.787324685246212	0.999996701290797	-4.83159509395708
GSE133767	10471474	Ak1	0.00721249999999918	-0.210919447261788	0.225344447261786	2.8543475	0.0698625908045881	0.945133734646559	0.999996701290797	-4.84629414526597
GSE133767	10590830	AK129341	-0.0761762499999996	-0.345386369845914	0.193033869845915	2.669263125	-0.597869426541441	0.557957645678335	0.999996701290797	-4.77354359082533
GSE133767	10403934	AK157302	0.147919999999999	-0.0554843594298631	0.351324359429861	4.09108375	1.53654321346299	0.143155929410834	0.999996701290797	-4.40209011478543
GSE133767	10508382	Ak2	-0.0252637499999997	-0.632884787753838	0.582357287753839	4.332181875	-0.0878502800434196	0.931041714589144	0.999996701290797	-4.84569893124856
GSE133767	10466925	Ak3	-0.12070625	-0.367902580502072	0.126490080502072	2.853384375	-1.03172956439476	0.316926885752644	0.999996701290797	-4.63471459808249
GSE133767	10472923	Ak3l2-ps	0.447859999999999	-0.456647750056162	1.35236775005616	4.77880625	1.04618411293787	0.310400079006206	0.999996701290797	-4.62901500149532
GSE133767	10506269	Ak4	0.45096125	-0.25879941413287	1.16072191413287	5.593513125	1.34247261824293	0.197428721019594	0.999996701290797	-4.49908259697877
GSE133767	10502863	Ak5	-0.0028075000000003	-0.191769801224664	0.186154801224664	2.24772875	-0.0313922708634634	0.97532926180215	0.999996701290797	-4.84711169249321
GSE133767	10406898	Ak6	0.344849999999999	-0.277091391170486	0.966791391170484	4.04573625	1.17154481650362	0.257842778253858	0.999996701290797	-4.57698848535866
GSE133767	10398130	Ak7	-0.0103262500000008	-0.273373291765394	0.252720791765393	2.310399375	-0.0829444535619477	0.934882929247757	0.999996701290797	-4.845874713722
GSE133767	10470614	Ak8	0.14018625	-0.0842612682051142	0.364633768205114	1.992666875	1.31968034391759	0.204768260032027	0.999996701290797	-4.50990368555479
GSE133767	10362745	Ak9	0.0227037499999998	-0.232286398488162	0.277693898488162	1.969491875	0.188127520408143	0.853046305457949	0.999996701290797	-4.83990103066695
GSE133767	10389701	Akap1	0.1388675	-0.126944370767803	0.404679370767803	3.09027125	1.10383556409307	0.285334280249208	0.999996701290797	-4.60565752261084
GSE133767	10386824	Akap10	0.0803512500000005	-0.200961580971659	0.36166408097166	2.040256875	0.603505501390359	0.554291181208475	0.999996701290797	-4.77217012385186
GSE133767	10421749	Akap11	-0.00969375000000028	-0.180186599512794	0.160799099512793	2.236853125	-0.120133404002575	0.905812567100427	0.999996701290797	-4.8442908226997
GSE133767	10367634	Akap12	0.14353625	-0.239142174229689	0.52621467422969	3.237194375	0.792511834167237	0.43918897995841	0.999996701290797	-4.71932349375306
GSE133767	10554166	Akap13	-0.00864999999999982	-0.225909171644685	0.208609171644685	2.56580875	-0.0841232659997646	0.933959775662093	0.999996701290797	-4.84583339569795
GSE133767	10604094	Akap14	0.215592500000001	-0.0359182298244931	0.467103229824494	2.8068725	1.81115353736402	0.0881633111834065	0.999996701290797	-4.25224365342443
GSE133767	10604038	Akap17b	0.00369125000000015	-0.273644380617293	0.281026880617293	3.180534375	0.0281219821480319	0.97789857531232	0.999996701290797	-4.84715254922572
GSE133767	10505143	Akap2	-0.245797500000001	-0.432760060536728	-0.0588349394632727	2.4451	-2.77779985787099	0.0130606704436086	0.999996701290797	-3.66395338762638
GSE133767	10541998	Akap3	-0.0212375	-0.279349072207029	0.236874072207029	1.92583375	-0.17384974297515	0.8640759056388	0.999996701290797	-4.84098263072109
GSE133767	10598279	Akap4	0.0570625000000002	-0.217872422665415	0.331997422665415	1.506775	0.438529712283087	0.666629000506381	0.999996701290797	-4.80731528567886
GSE133767	10396640	Akap5	-0.00524875000000069	-0.309402850805881	0.29890535080588	2.666390625	-0.0364619884051452	0.971346784025037	0.999996701290797	-4.84703948102416
GSE133767	10395702	Akap6	-0.1560475	-0.380928270918408	0.0688332709184082	1.956315	-1.46616426833585	0.161201379305406	0.999996701290797	-4.43822274948127
GSE133767	10368356	Akap7	0.0566737500000003	-0.196046502889473	0.309394002889473	2.230096875	0.473827256870172	0.641765581374205	0.999996701290797	-4.80068783774064
GSE133767	10449839	Akap8	0.0937562500000007	-0.360353161507522	0.547865661507524	3.081658125	0.436232344073984	0.66826162019582	0.999996701290797	-4.80772953753184
GSE133767	10449854	Akap8l	0.0311500000000002	-0.218412400916602	0.280712400916602	2.3965375	0.263728480864176	0.795219510449595	0.999996701290797	-4.83276538802284
GSE133767	10519420	Akap9	-0.0143474999999997	-0.175402909778228	0.146707909778228	1.660965	-0.188225757467606	0.852970522988042	0.999996701290797	-4.8398932951853
GSE133767	10556208	Akip1	0.1280175	-0.194734301119812	0.450769301119812	2.347675	0.838067124369914	0.413840965859723	0.999996701290797	-4.70467955288207
GSE133767	10445006	Akirin1	-0.0935950000000005	-0.362370494901404	0.175180494901403	3.89963125	-0.735768372885773	0.47209186115652	0.999996701290797	-4.73654830513834
GSE133767	10503917	Akirin2	-0.0415524999999999	-0.365894135679419	0.282789135679419	4.21330875	-0.270690237338824	0.789950196414205	0.999996701290797	-4.83198964569416
GSE133767	10513666	Akna	-0.1130525	-0.362106911241121	0.136001911241121	3.78310375	-0.959100394289404	0.351204713461783	0.999996701290797	-4.66237289846046
GSE133767	10495371	Aknad1	0.0100824999999993	-0.264238123063649	0.284403123063647	3.281965	0.0776583053910902	0.939023783297438	0.999996701290797	-4.84605283526726
GSE133767	10505457	Aknaos	0.0923874999999996	-0.227201341178007	0.411976341178006	3.60234125	0.610801008632596	0.549564384221596	0.999996701290797	-4.77037445460243
GSE133767	10348131	Akp3	0.0410425000000001	-0.190375188959352	0.272460188959352	3.4634675	0.374727350058544	0.712584736303692	0.999996701290797	-4.81803643109634
GSE133767	10515352	Akr1a1	0.2945775	-0.442595230846893	1.03175023084689	4.56218625	0.844322665226836	0.410435373591659	0.999996701290797	-4.70261295179677
GSE133767	10537157	Akr1b10	-0.113016250000001	-0.347007251256328	0.120974751256326	3.796023125	-1.02051613205591	0.322057484751888	0.999996701290797	-4.6390921420762
GSE133767	10385236	Akr1b3	-0.0165599999999992	-0.30581048068681	0.272690480686811	4.41194375	-0.120966295345271	0.905162916292586	0.999996701290797	-4.84424872367519
GSE133767	10537169	Akr1b7	-0.0665687499999996	-0.32746402138155	0.194326521381551	2.431428125	-0.539116137074447	0.596929608673503	0.999996701290797	-4.78714114844847
GSE133767	10537146	Akr1b8	0.0283774999999995	-0.69598847101025	0.752743471010249	4.39110875	0.082774054682167	0.935016380249412	0.999996701290797	-4.84588063812701
GSE133767	10407445	Akr1c12	-0.0295975000000002	-0.243727163211372	0.184532163211372	1.735215	-0.292049409564944	0.77384994342463	0.999996701290797	-4.82948537318586
GSE133767	10403303	Akr1c13	-0.17224125	-0.442485304540079	0.0980028045400793	1.601808125	-1.34666371277688	0.196102251586871	0.999996701290797	-4.49707898879525
GSE133767	10403291	Akr1c14	-0.196692499999999	-0.426397742290839	0.0330127422908404	2.05952625	-1.80923520926451	0.0884721742298178	0.999996701290797	-4.25333307263633
GSE133767	10407435	Akr1c18	-0.0776999999999997	-0.356222282217609	0.20082228221761	2.04673375	-0.589439466262195	0.563465579227389	0.999996701290797	-4.77557546243367
GSE133767	10403312	Akr1c19	0.12348125	-0.145154606293726	0.392117106293726	1.761576875	0.971214537809358	0.345314986849705	0.999996701290797	-4.65787500645434
GSE133767	10407456	Akr1c20	-0.0405275	-0.280049164183378	0.198994164183378	1.81601875	-0.357505848798462	0.725196415503395	0.999996701290797	-4.82064999294219
GSE133767	10403333	Akr1c21	-0.0679462499999997	-0.356534019908348	0.220641519908349	1.747331875	-0.4974686393787	0.625352313136997	0.999996701290797	-4.79597456676973
GSE133767	10403322	Akr1c6	-0.0371650000000001	-0.36615783294529	0.29182783294529	1.89307125	-0.238685390466974	0.814257219800669	0.999996701290797	-4.83539085037111
GSE133767	10355176	Akr1cl	-0.0348162499999993	-0.378100640222301	0.308468140222303	1.784874375	-0.214292057026417	0.832917010949996	0.999996701290797	-4.83769916997382
GSE133767	10537306	Akr1d1	-0.255203749999999	-0.484301692659585	-0.0261058073404135	2.457426875	-2.35366148021053	0.0311333554756699	0.999996701290797	-3.92808171902118
GSE133767	10407467	Akr1e1	-0.137651249999999	-0.474882862183974	0.199580362183975	2.574969375	-0.86244223835198	0.400673854002707	0.999996701290797	-4.69655184246486
GSE133767	10509635	Akr7a5	0.0395062500000005	-0.212313571699731	0.291326071699733	2.718258125	0.331477483285267	0.744411963609934	0.999996701290797	-4.82437220949895
GSE133767	10402766	Akt1	-0.06530375	-0.2706157645522	0.1400082645522	3.486688125	-0.672050477166008	0.510753528053957	0.999996701290797	-4.75451337153045
GSE133767	10552752	Akt1s1	-0.00707000000000058	-0.28497675343851	0.270836753438509	4.6228825	-0.0537524730752764	0.957770898096891	0.999996701290797	-4.84671207332741
GSE133767	10374364	Akt2	-0.2346475	-0.485332273209607	0.0160372732096062	2.62075375	-1.97772595619846	0.0647233384021549	0.999996701290797	-4.15578196311571
GSE133767	10374364	Akt2-ps	-0.2346475	-0.485332273209607	0.0160372732096062	2.62075375	-1.97772595619846	0.0647233384021549	0.999996701290797	-4.15578196311571
GSE133767	10360506	Akt3	0.52904125	-0.0397644704627614	1.09784697046276	2.378760625	1.9651862538892	0.0662706461281051	0.999996701290797	-4.16316203814208
GSE133767	10580537	Aktip	-0.0181212499999992	-0.282394512036501	0.246152012036502	2.818444375	-0.144881543386177	0.886540561769857	0.999996701290797	-4.84291625126483
GSE133767	10513608	Alad	0.141946250000001	-0.135957552101092	0.419850052101095	3.223538125	1.07921400444565	0.295850987824867	0.999996701290797	-4.61575392033622
GSE133767	10596454	Alas1	0.181545000000001	-0.0573653959563558	0.420455395956358	3.0389275	1.60556311166963	0.127133376939798	0.999996701290797	-4.36568556231392
GSE133767	10602372	Alas2	-0.0920575000000001	-0.243660716506917	0.0595457165069169	2.16316	-1.28300662291133	0.217030420221548	0.999996701290797	-4.52704422269571
GSE133767	10523062	Alb	0.0144962499999994	-0.170067723995148	0.199060223995147	1.861656875	0.165953675186817	0.870188229929127	0.999996701290797	-4.8415443600204
GSE133767	10439895	Alcam	-0.0352812500000006	-0.239226835325156	0.168664335325155	3.313520625	-0.365517177946699	0.719319149204423	0.999996701290797	-4.81944908304514
GSE133767	10563130	Aldh16a1	-0.1124175	-0.295704880514069	0.0708698805140682	3.119665	-1.29592388927288	0.212647116591348	0.999996701290797	-4.52104560092375
GSE133767	10467470	Aldh18a1	0.0153812499999999	-0.237880119521378	0.268642619521378	2.358480625	0.128321910614721	0.89942863775837	0.999996701290797	-4.84386433966848
GSE133767	10461979	Aldh1a1	0.0980337500000004	-0.145232277003663	0.341299777003664	2.158666875	0.851475763299527	0.406563489274139	0.999996701290797	-4.70023349866068
GSE133767	10586865	Aldh1a2	0.0792775000000003	-0.183793554260419	0.342348554260419	2.283015	0.636729568780217	0.532942449475965	0.999996701290797	-4.76383067995289
GSE133767	10564417	Aldh1a3	-0.128155	-0.323401172106458	0.0670911721064586	2.38399125	-1.38685534338144	0.183741116690771	0.999996701290797	-4.47765137072117
GSE133767	10466624	Aldh1a7	-0.101685	-0.323123968708658	0.119753968708658	2.27950875	-0.970244031982076	0.345784286073031	0.999996701290797	-4.65823707085094
GSE133767	10504606	Aldh1b1	0.117310000000001	-0.131748073485983	0.366368073485985	3.02484125	0.995204996207599	0.333855055587888	0.999996701290797	-4.6488302280974
GSE133767	10540034	Aldh1l1	-0.0557212500000004	-0.270431140359748	0.158988640359747	2.644344375	-0.548336224610922	0.590724928752532	0.999996701290797	-4.78509477471083
GSE133767	10371332	Aldh1l2	0.08207875	-0.125505795508194	0.289663295508194	2.321043125	0.835437284869929	0.415278120381664	0.999996701290797	-4.70554436564426
GSE133767	10533345	Aldh2	0.19211125	-0.0493258532539986	0.433548353253999	3.088881875	1.68122919580533	0.111344273621677	0.999996701290797	-4.3247554611296
GSE133767	10376765	Aldh3a1	-0.1959675	-0.396932041024791	0.00499704102479059	2.60095875	-2.06035831165137	0.0553163682102768	0.999996701290797	-4.10673156225049
GSE133767	10386652	Aldh3a2	-0.0607700000000002	-0.352594969141733	0.231054969141733	2.5348875	-0.439992147091426	0.665590621279266	0.999996701290797	-4.80705049366311
GSE133767	10464560	Aldh3b1	-0.0960974999999995	-0.302133638988066	0.109938638988067	2.36308	-0.985477751578964	0.338468994540971	0.999996701290797	-4.65251942924791
GSE133767	10460259	Aldh3b2	0.11910375	-0.144295960792048	0.382503460792048	4.436640625	0.955406692227779	0.35301429393156	0.999996701290797	-4.66373501476098
GSE133767	10509790	Aldh4a1	-0.0105637500000006	-0.229119897504645	0.207992397504644	2.567259375	-0.102125271762076	0.919874859806559	0.999996701290797	-4.84513009349966
GSE133767	10408335	Aldh5a1	-0.0411574999999993	-0.246300955029884	0.163985955029885	2.42145125	-0.423905897348156	0.677050504221776	0.999996701290797	-4.80991634691259
GSE133767	10401473	Aldh6a1	0.0696875000000006	-0.123283583182351	0.262658583182352	2.4905	0.763028548670302	0.456102661047214	0.999996701290797	-4.72841558007149
GSE133767	10458960	Aldh7a1	-0.0465587500000004	-0.232621858366569	0.139504358366568	2.670939375	-0.528712011758999	0.603969755378356	0.999996701290797	-4.78941091650523
GSE133767	10362052	Aldh8a1	0.0158600000000007	-0.236526639464733	0.268246639464734	1.89143625	0.132774587002653	0.895960190403779	0.999996701290797	-4.84362066844531
GSE133767	10351414	Aldh9a1	-0.114784999999999	-0.334301996460407	0.104731996460409	2.19912	-1.1048291494014	0.284915747720377	0.999996701290797	-4.60524635300248
GSE133767	10568050	Aldoa	0.15750125	-0.277177100893918	0.592179600893918	4.777494375	0.765586261536848	0.454619689075552	0.999996701290797	-4.72763896482985
GSE133767	10513912	Aldoart1	-0.0738525000000001	-0.343964270025271	0.196259270025271	2.7260825	-0.577696624224235	0.571185501993243	0.999996701290797	-4.77836086706419
GSE133767	10395825	Aldoart2	-0.0155674999999991	-0.240157708656216	0.209022708656218	3.61830625	-0.146455671035183	0.885317089685039	0.999996701290797	-4.84282016884678
GSE133767	10512904	Aldob	-0.0123300000000004	-0.237613613628175	0.212953613628174	2.36420875	-0.115640939169648	0.909317840980678	0.999996701290797	-4.84451289507345
GSE133767	10379153	Aldoc	0.13270625	-0.0800029150302583	0.345415415030257	2.602275625	1.31820608342042	0.205250366774747	0.999996701290797	-4.5105992181703
GSE133767	10433389	Alg1	0.0277374999999993	-0.221362140008587	0.276837140008586	2.65880875	0.235273142110688	0.816860801835033	0.999996701290797	-4.83572855169031
GSE133767	10426292	Alg10b	-0.117585	-0.35561909358566	0.120449093585661	2.50068625	-1.04373655789576	0.311498387626273	0.999996701290797	-4.62998457575898
GSE133767	10570764	Alg11	-0.0785400000000003	-0.392191085910662	0.235111085910661	2.28943875	-0.529081088934837	0.603719316557149	0.999996701290797	-4.78933111463632
GSE133767	10431300	Alg12	-0.2252875	-0.4377870389876	-0.0127879610124005	2.756645	-2.24004756793653	0.0390133719242202	0.999996701290797	-3.9979654565221
GSE133767	10602223	Alg13	0.00226749999999987	-0.391359060019479	0.395894060019479	3.21680375	0.0121714140933287	0.990433244276721	0.999996701290797	-4.84728747162627
GSE133767	10495651	Alg14	0.0917312500000005	-0.258776234454927	0.442238734454928	3.388830625	0.552965648618102	0.587621808625375	0.999996701290797	-4.78405494566472
GSE133767	10512847	Alg2	0.126305	-0.190821126335829	0.443431126335829	2.80056625	0.841524293179942	0.411956588710783	0.999996701290797	-4.70353908132669
GSE133767	10438517	Alg3	-0.0297737499999999	-0.250988878587007	0.191441378587007	2.869113125	-0.284378559671968	0.779620341005464	0.999996701290797	-4.83040628950527
GSE133767	10492078	Alg5	0.2270975	-0.303495506454594	0.757690506454593	2.93605375	0.904334228991867	0.378694143888421	0.999996701290797	-4.68211626531797
GSE133767	10506154	Alg6	-0.0449374999999983	-0.237013726537642	0.147138726537646	3.25106875	-0.494325972981443	0.627522741564511	0.999996701290797	-4.79661372523993
GSE133767	10555041	Alg8	-0.11173375	-0.326943696981918	0.103476196981918	2.480939375	-1.09698369256115	0.28823288483655	0.999996701290797	-4.60848513168762
GSE133767	10585233	Alg9	-0.0424462500000002	-0.263416417913121	0.17852391791312	2.669640625	-0.405867072731673	0.689999104652814	0.999996701290797	-4.81300736385389
GSE133767	10452734	Alk	0.0564125000000004	-0.179994774743698	0.292819774743699	2.50308625	0.504188165151119	0.62072348893709	0.999996701290797	-4.7945949989196
GSE133767	10401795	Alkbh1	-0.0741062499999998	-0.266225064084179	0.118012564084179	3.175470625	-0.815010262443025	0.426550411743729	0.999996701290797	-4.71218090701543
GSE133767	10532802	Alkbh2	-0.161054999999999	-0.419524936156939	0.0974149361569417	3.39621625	-1.31656502544869	0.205788077766585	0.999996701290797	-4.51137280944249
GSE133767	10485282	Alkbh3	0.0375949999999996	-0.164784800747817	0.239974800747816	3.0534375	0.392501266495083	0.699657948296083	0.999996701290797	-4.81521365657421
GSE133767	10526487	Alkbh4	0.0116499999999991	-0.194095489395545	0.217395489395544	3.07051625	0.119639265958097	0.906198024709036	0.999996701290797	-4.84431566213103
GSE133767	10376685	Alkbh5	0.113107499999999	-0.231839549463791	0.45805454946379	2.87868875	0.692814719467049	0.497958970904666	0.999996701290797	-4.74882123577852
GSE133767	10551865	Alkbh6	0.0274774999999998	-0.332427928453452	0.387382928453452	3.37301625	0.161312104327754	0.873785240397033	0.999996701290797	-4.84186244389783
GSE133767	10446214	Alkbh7	-0.147986249999999	-0.385315104404413	0.089342604404414	2.060941875	-1.31749495113305	0.205483240195676	0.999996701290797	-4.51093452645855
GSE133767	10582925	Alkbh8	0.2918125	0.00732762084085448	0.576297379159145	2.63276125	2.16731901183621	0.0449892579199163	0.999996701290797	-4.04229021902155
GSE133767	10399739	Allc	-0.0880637499999999	-0.342247561497636	0.166120061497636	2.240328125	-0.732027547385729	0.474312067597604	0.999996701290797	-4.7376436192879
GSE133767	10539617	Alms1	0.0998937500000006	-0.149395197665518	0.349182697665519	2.345064375	0.846668553548313	0.409162943563093	0.999996701290797	-4.70183451771619
GSE133767	10539632	Alms1-ps1	0.0589275	-0.105958046497417	0.223813046497417	1.67236625	0.755115814369713	0.460709269508803	0.999996701290797	-4.73080349387215
GSE133767	10539632	Alms1-ps2	0.0589275	-0.105958046497417	0.223813046497417	1.67236625	0.755115814369713	0.460709269508803	0.999996701290797	-4.73080349387215
GSE133767	10387821	Alox12	-0.0437962500000006	-0.333397669095702	0.245805169095701	3.647663125	-0.319532014753662	0.753290189309634	0.999996701290797	-4.82598831684356
GSE133767	10377490	Alox12b	-0.0475450000000004	-0.285823299298043	0.190733299298042	3.75800125	-0.421597956645287	0.678701490479579	0.999996701290797	-4.81031906828839
GSE133767	10387838	Alox12e	0.0569312499999994	-0.194048719490475	0.307911219490474	2.262503125	0.47928053847012	0.637962165378019	0.999996701290797	-4.79962010048149
GSE133767	10387855	Alox15	-0.21219	-0.462156607571523	0.037776607571523	2.9642	-1.79358124451907	0.0910283178928252	0.999996701290797	-4.26220298110868
GSE133767	10547153	Alox5	-0.16238875	-0.378341416441774	0.0535639164417737	2.622944375	-1.58882295307361	0.130873046712458	0.999996701290797	-4.37459955579938
GSE133767	10527638	Alox5ap	-0.0207299999999999	-0.295575620476647	0.254115620476647	2.4244425	-0.159363411542916	0.875296244850322	0.999996701290797	-4.84199331084094
GSE133767	10387257	Alox8	0.0313062500000001	-0.184979483526421	0.247591983526422	2.671739375	0.305830864608939	0.763517263145914	0.999996701290797	-4.82777031937317
GSE133767	10377473	Aloxe3	-0.0390687500000007	-0.316723939466111	0.23858643946611	2.896573125	-0.297304757250693	0.76990444800878	0.999996701290797	-4.82884053145018
GSE133767	10356367	Alpi	0.0327499999999996	-0.182388754488832	0.247888754488832	2.44411	0.321640546660534	0.751720432617197	0.999996701290797	-4.82570727679485
GSE133767	10502042	Alpk1	-0.0514324999999993	-0.318424805159961	0.215559805159963	2.43181375	-0.407021196886858	0.689167624246502	0.999996701290797	-4.81281349518462
GSE133767	10459455	Alpk2	-0.0306662500000003	-0.282083660832316	0.220751160832315	2.567880625	-0.257717232794742	0.799777622782343	0.999996701290797	-4.83341917064322
GSE133767	10554487	Alpk3	0.0327912499999994	-0.28797141643318	0.353553916433179	2.604303125	0.215999275524678	0.831607572713709	0.999996701290797	-4.83754563238586
GSE133767	10517587	Alpl	0.08090625	-0.139783204177159	0.301595704177159	3.763168125	0.774602026474509	0.44941602484376	0.999996701290797	-4.72488301214898
GSE133767	10356353	Alppl2	0.0102312499999999	-0.214281688135898	0.234744188135898	3.190305625	0.0962865133397511	0.924440380338326	0.999996701290797	-4.84537307341757
GSE133767	10354979	Als2	0.0102300000000004	-0.198475526674191	0.218935526674192	2.72073	0.10356662440671	0.918748255333919	0.999996701290797	-4.84506791510882
GSE133767	10589654	Als2cl	-0.11281375	-0.338618968803433	0.112991468803434	2.710778125	-1.05561656787661	0.306193504691265	0.999996701290797	-4.62526145340239
GSE133767	10354916	Als2cr11	0.000238750000000731	-0.292984529490486	0.293462029490487	2.322865625	0.00172037479372158	0.998647747303569	0.999996701290797	-4.84731795114716
GSE133767	10354883	Als2cr12	-0.0439299999999998	-0.26831709417032	0.180457094170321	1.4868725	-0.413658036408003	0.684394144630271	0.999996701290797	-4.81168830269617
GSE133767	10372145	Alx1	-0.0370575	-0.30395249585397	0.22983749585397	2.184735	-0.293368731823967	0.772858846517255	0.999996701290797	-4.8293245529409
GSE133767	10495218	Alx3	0.0451074999999994	-0.16746665810141	0.257681658101409	3.1873575	0.448349229062288	0.65967028512642	0.999996701290797	-4.80552106112174
GSE133767	10474081	Alx4	0.00968750000000096	-0.238733830781461	0.258108830781463	3.5766675	0.0823950210120323	0.935313234551894	0.999996701290797	-4.84589377268357
GSE133767	10393844	Alyref	0.197845000000002	-0.421082833459011	0.816772833459015	4.24081875	0.675403338222088	0.508674918717276	0.999996701290797	-4.75360495577378
GSE133767	10351636	Alyref2	0.37942375	0.0436208414950578	0.715226658504941	2.565179375	2.38736155499847	0.0290989333196999	0.999996701290797	-3.907232976046
GSE133767	10423090	Amacr	0.115515	-0.064741882218251	0.295771882218251	2.37426375	1.35401870715249	0.193791659040251	0.999996701290797	-4.49355257496985
GSE133767	10522946	Ambn	-0.267838750000001	-0.525621282178562	-0.0100562178214397	2.754595625	-2.19532114924325	0.0425949547902137	0.999996701290797	-4.02526779536763
GSE133767	10513630	Ambp	-0.227728750000001	-0.48519837934061	0.0297408793406082	2.556244375	-1.86883083757502	0.0793100432184646	0.999996701290797	-4.21924774558495
GSE133767	10473981	Ambra1	0.0583574999999996	-0.146951711493871	0.26366671149387	2.4937125	0.600573798217483	0.556196749874573	0.999996701290797	-4.77288605546295
GSE133767	10447510	Amd-ps1	0.441285	-0.182200705715317	1.06477070571532	4.0439075	1.49544622734518	0.153476764586199	0.999996701290797	-4.42331534267155
GSE133767	10447510	Amd-ps3	0.441285	-0.182200705715317	1.06477070571532	4.0439075	1.49544622734518	0.153476764586199	0.999996701290797	-4.42331534267155
GSE133767	10447510	Amd-ps4	0.441285	-0.182200705715317	1.06477070571532	4.0439075	1.49544622734518	0.153476764586199	0.999996701290797	-4.42331534267155
GSE133767	10447510	Amd1	0.441285	-0.182200705715317	1.06477070571532	4.0439075	1.49544622734518	0.153476764586199	0.999996701290797	-4.42331534267155
GSE133767	10447510	Amd2	0.441285	-0.182200705715317	1.06477070571532	4.0439075	1.49544622734518	0.153476764586199	0.999996701290797	-4.42331534267155
GSE133767	10371970	Amdhd1	0.0832624999999991	-0.174540296257842	0.34106529625784	2.04699875	0.682401480387388	0.504352055703561	0.999996701290797	-4.75169558934674
GSE133767	10448441	Amdhd2	-0.0156750000000008	-0.153360710724188	0.122010710724187	4.38578375	-0.240545266978116	0.812839054987163	0.999996701290797	-4.83520475813483
GSE133767	10607924	Amelx	-0.0337787500000002	-0.23962110059304	0.172063600593039	2.089618125	-0.346726454676391	0.733132308544484	0.999996701290797	-4.82222485185091
GSE133767	10605811	Amer1	-0.04540875	-0.223068477483139	0.132250977483139	2.590295625	-0.540043437004427	0.596304116908547	0.999996701290797	-4.78693681888398
GSE133767	10415714	Amer2	0.0665762500000011	-0.187254272796261	0.320406772796264	2.896284375	0.554183539706602	0.586806821776468	0.999996701290797	-4.78378002292878
GSE133767	10345401	Amer3	0.052649999999999	-0.20121144943367	0.306511449433668	2.66676875	0.438207450680978	0.666857911296674	0.999996701290797	-4.80737352096065
GSE133767	10580704	Amfr	-0.10896875	-0.331668355657076	0.113730855657075	3.354849375	-1.03385744207826	0.315959936950119	0.999996701290797	-4.63387955350749
GSE133767	10364903	Amh	0.17395375	-0.0749628151610063	0.422870315161006	4.164159375	1.47658391534176	0.158416660607389	0.999996701290797	-4.43293911572625
GSE133767	10427222	Amhr2	0.0117362499999993	-0.252687393677137	0.276159893677135	2.578935625	0.0937793469127237	0.926401661870258	0.999996701290797	-4.84547302825324
GSE133767	10584841	Amica1	-0.2281325	-0.455613581434681	-0.000651418565319029	2.341245	-2.11894660339576	0.0494186947463454	0.999996701290797	-4.07155382569725
GSE133767	10495270	Amigo1	-0.111481249999999	-0.352844537878301	0.129882037878304	4.412876875	-0.975907720377166	0.343051802995398	0.999996701290797	-4.65611991133308
GSE133767	10431935	Amigo2	-0.20288125	-0.451526223438488	0.0457637234384869	2.420971875	-1.72401232081575	0.103186617370643	0.999996701290797	-4.30117399829916
GSE133767	10588849	Amigo3	0.1054825	-0.112633385704856	0.323598385704856	2.23525125	1.0218126019537	0.321461287497782	0.999996701290797	-4.63858799849638
GSE133767	10607116	Ammecr1	0.0106375000000005	-0.251730660044499	0.2730056600445	1.78085375	0.0856656236077979	0.932752068643532	0.999996701290797	-4.84577845589948
GSE133767	10454469	Ammecr1l	0.0465425000000002	-0.237230994861478	0.330315994861479	3.337055	0.346542110373392	0.733268298959345	0.999996701290797	-4.82225137485668
GSE133767	10398635	Amn	-0.0494312499999996	-0.231817699540494	0.132955199540495	4.780853125	-0.572647225657087	0.574521883827499	0.999996701290797	-4.77954244247401
GSE133767	10549536	Amn1	-0.0424200000000003	-0.438284823549233	0.353444823549232	2.1456425	-0.226413276345814	0.823631214247414	0.999996701290797	-4.83658291947115
GSE133767	10607189	Amot	-0.12579375	-0.380421662332354	0.128834162332354	2.460348125	-1.04383340678737	0.311454874835814	0.999996701290797	-4.62994624462344
GSE133767	10590918	Amotl1	-0.0330199999999992	-0.217641098973586	0.151601098973587	2.41844875	-0.377897374303269	0.71027245268421	0.999996701290797	-4.817542299677
GSE133767	10588226	Amotl2	0.0268250000000001	-0.202902619235011	0.256552619235011	2.9051775	0.246720170259512	0.808135493166822	0.999996701290797	-4.83457667933846
GSE133767	10494873	Ampd1	-0.0303237499999991	-0.251123890243468	0.19047639024347	2.401045625	-0.290176140369582	0.775257866104748	0.999996701290797	-4.82971249237763
GSE133767	10501244	Ampd2	-0.0651887499999995	-0.246771575682456	0.116394075682457	2.794168125	-0.758535691802991	0.458714818921109	0.999996701290797	-4.7297741651867
GSE133767	10556302	Ampd3	-0.0260362500000002	-0.253012841546094	0.200940341546094	2.288463125	-0.242368123398067	0.811449768286305	0.999996701290797	-4.83502098400207
GSE133767	10403796	Amph	-0.0384012500000004	-0.271117420191029	0.194314920191028	1.758129375	-0.348655834719123	0.73170955847789	0.999996701290797	-4.82194643057115
GSE133767	10588883	Amt	-0.0924175000000012	-0.351743459680372	0.16690845968037	2.84930875	-0.75298506043248	0.461954584673992	0.999996701290797	-4.73144271562949
GSE133767	10522934	Amtn	-0.0641587500000003	-0.328365266623262	0.200047766623262	2.404244375	-0.513086403277711	0.614619010075478	0.999996701290797	-4.79274103014164
GSE133767	10501555	Amy1	-0.0696375000000005	-0.243715049549897	0.104440049549896	1.52406625	-0.845237086071339	0.409939078788653	0.999996701290797	-4.70230974312512
GSE133767	10501500	Amy2a1	0.04175	-0.123548197208724	0.207048197208724	1.5103025	0.533662271012101	0.600614987597544	0.999996701290797	-4.78833618389399
GSE133767	10501500	Amy2a2	0.04175	-0.123548197208724	0.207048197208724	1.5103025	0.533662271012101	0.600614987597544	0.999996701290797	-4.78833618389399
GSE133767	10501500	Amy2a3	0.04175	-0.123548197208724	0.207048197208724	1.5103025	0.533662271012101	0.600614987597544	0.999996701290797	-4.78833618389399
GSE133767	10501500	Amy2a4	0.04175	-0.123548197208724	0.207048197208724	1.5103025	0.533662271012101	0.600614987597544	0.999996701290797	-4.78833618389399
GSE133767	10501500	Amy2a5	0.04175	-0.123548197208724	0.207048197208724	1.5103025	0.533662271012101	0.600614987597544	0.999996701290797	-4.78833618389399
GSE133767	10501500	Amy2b	0.04175	-0.123548197208724	0.207048197208724	1.5103025	0.533662271012101	0.600614987597544	0.999996701290797	-4.78833618389399
GSE133767	10527043	Amz1	-0.17983875	-0.445133068037731	0.0854555680377303	3.797741875	-1.43229825884293	0.170532011929343	0.999996701290797	-4.45523207529034
GSE133767	10382257	Amz2	0.0445112500000002	-0.155232591352701	0.244255091352701	2.769153125	0.470841278404682	0.64385253195405	0.999996701290797	-4.80126752810729
GSE133767	10487513	Anapc1	0.13403375	-0.0701333154822712	0.33820081548227	2.590701875	1.38709631849125	0.183668945834032	0.999996701290797	-4.47753373879968
GSE133767	10573048	Anapc10	-0.14161125	-0.535110025018879	0.251887525018879	1.939970625	-0.760383192845319	0.457639570148812	0.999996701290797	-4.72921636972502
GSE133767	10383423	Anapc11	-0.111805	-0.417296303566787	0.193686303566787	3.0514775	-0.773286648109535	0.450172921812254	0.999996701290797	-4.7252868858805
GSE133767	10588223	Anapc13	-0.31275125	-1.50204327692631	0.876540776926312	5.389696875	-0.555633835091587	0.585837061506303	0.999996701290797	-4.78345189497026
GSE133767	10555576	Anapc15	0.21081875	-0.140308758700767	0.561946258700766	4.055243125	1.26859360007312	0.222004703329554	0.999996701290797	-4.53368714976428
GSE133767	10372091	Anapc15-ps	0.00516499999999986	-0.597178616103103	0.607508616103102	3.11931375	0.0181177453509171	0.985759869140735	0.999996701290797	-4.84724966046557
GSE133767	10369295	Anapc16	0.047951250000001	-0.227060990867505	0.322963490867507	3.195756875	0.368405449188911	0.717204671458794	0.999996701290797	-4.81900976617693
GSE133767	10469965	Anapc2	-0.0658487499999998	-0.343057198373485	0.211359698373485	2.736784375	-0.50190232847291	0.622296287846052	0.999996701290797	-4.79506627607493
GSE133767	10521863	Anapc4	-0.0260937500000002	-0.346570763173628	0.294383263173628	2.777405625	-0.172035371669587	0.865479634557824	0.999996701290797	-4.84111400297517
GSE133767	10533549	Anapc5	-0.119611249999999	-0.630772056622248	0.391549556622249	3.624034375	-0.494416117017878	0.627460435953998	0.999996701290797	-4.79659544545935
GSE133767	10525406	Anapc7	-0.10388625	-0.297532218393628	0.0897597183936276	2.349325625	-1.13351624179712	0.273026752561479	0.999996701290797	-4.59325146688378
GSE133767	10414537	Ang	0.0936975000000002	-0.147073910707389	0.33446891070739	2.3606175	0.822244965968628	0.422535944088776	0.999996701290797	-4.7098468400657
GSE133767	10419566	Ang2	-0.30694375	-0.506670768527821	-0.107216731472178	1.709350625	-3.24713326601441	0.00483504988453636	0.999996701290797	-3.37496902939978
GSE133767	10419575	Ang4	-0.0590087500000003	-0.302946124410987	0.184928624410986	5.394096875	-0.511112152570712	0.615970917706501	0.999996701290797	-4.79315503152544
GSE133767	10414260	Ang5	-0.0835699999999993	-0.346587935123119	0.17944793512312	1.5549125	-0.671341006749717	0.511193985625767	0.999996701290797	-4.75470506342219
GSE133767	10419158	Ang6	-0.0613949999999999	-0.340596181357434	0.217806181357435	1.85827375	-0.464615708882477	0.648213547973283	0.999996701290797	-4.80246485119469
GSE133767	10401684	Angel1	-0.0831387499999994	-0.313562573615402	0.147285073615403	2.821749375	-0.762349726553131	0.456496743166256	0.999996701290797	-4.72862130639716
GSE133767	10352690	Angel2	-0.125204999999999	-0.321117651564649	0.0707076515646498	2.40099625	-1.35032194967239	0.194950265179427	0.999996701290797	-4.49532664676891
GSE133767	10428376	Angpt1	0.193593750000001	-0.0753262210403143	0.462513721040316	2.069098125	1.52106023883864	0.146974012089979	0.999996701290797	-4.41012730185624
GSE133767	10577315	Angpt2	-0.0606499999999994	-0.294372585650218	0.173072585650219	1.66981125	-0.548287393199588	0.59075770447803	0.999996701290797	-4.78510569895526
GSE133767	10477042	Angpt4	0.114605	-0.0861789250178392	0.315388925017839	2.8888075	1.20601514868628	0.244639873066661	0.999996701290797	-4.56189902160653
GSE133767	10350840	Angptl1	0.0423424999999997	-0.173391496467527	0.258076496467526	2.222185	0.414701918606269	0.683644588005812	0.999996701290797	-4.81150972303283
GSE133767	10471555	Angptl2	0.0423937500000009	-0.219013908823781	0.303801408823783	2.596051875	0.342658622057198	0.736135258905881	0.999996701290797	-4.82280691755287
GSE133767	10506125	Angptl3	0.11309	-0.112451376300988	0.338631376300988	1.73403625	1.05943938776437	0.304500446163394	0.999996701290797	-4.62373255094709
GSE133767	10450038	Angptl4	0.0961949999999994	-0.116113730580815	0.308503730580813	2.88713	0.957332455456181	0.352070041719665	0.999996701290797	-4.66302540175038
GSE133767	10591350	Angptl6	-0.0285862499999996	-0.317809147596143	0.260636647596144	3.489096875	-0.208834694807691	0.837106191469753	0.999996701290797	-4.83818187261623
GSE133767	10518526	Angptl7	0.11144375	-0.122812995302908	0.345700495302908	2.792539375	1.00517516432066	0.329172043563276	0.999996701290797	-4.64501813752248
GSE133767	10423363	Ank	0.168351250000001	-0.145399931649124	0.482102431649125	3.292833125	1.13372862605374	0.272940133662269	0.999996701290797	-4.59316177906573
GSE133767	10570894	Ank1	-0.150321250000001	-0.375397799571305	0.0747552995713042	2.524499375	-1.41113403589333	0.176584265696234	0.999996701290797	-4.46573214568147
GSE133767	10501971	Ank2	-0.0740987500000005	-0.283659089407861	0.13546158940786	2.587024375	-0.747102046163808	0.465403538113492	0.999996701290797	-4.73319921729177
GSE133767	10363786	Ank3	-0.0252337499999999	-0.210704396693938	0.160236896693939	2.124001875	-0.287464848993314	0.777297063087568	0.999996701290797	-4.83003866823581
GSE133767	10355479	Ankar	-0.00634124999999996	-0.267640336316678	0.254957836316678	1.702020625	-0.051276116011787	0.959714527564795	0.999996701290797	-4.84676666158324
GSE133767	10594524	Ankdd1a	0.0589337499999996	-0.184481610943705	0.302349110943704	2.413250625	0.511557236317908	0.615666013214695	0.999996701290797	-4.79306182965974
GSE133767	10411290	Ankdd1b	0.0161225000000003	-0.197740882405599	0.229985882405599	2.12649375	0.159284710910276	0.875357279313582	0.999996701290797	-4.84199856283129
GSE133767	10476497	Ankef1	-0.0279787499999995	-0.185050043699224	0.129092543699225	2.149594375	-0.376365342070895	0.711389587827835	0.999996701290797	-4.81778161276138
GSE133767	10389759	Ankfn1	0.18533625	-0.0176282843723644	0.388300784372365	1.838196875	1.92938257520721	0.0708730657353285	0.999996701290797	-4.18413447734987
GSE133767	10378126	Ankfy1	-0.18979375	-0.386537672797123	0.00695017279712301	2.831599375	-2.0382559449661	0.0577028175655599	0.999996701290797	-4.1199195192192
GSE133767	10454944	Ankhd1	-0.0280937500000009	-0.275018281845188	0.218830781845187	4.496389375	-0.240393993209963	0.81295437699845	0.999996701290797	-4.83521994738614
GSE133767	10527896	Ankib1	-0.0134187499999996	-0.163056835124307	0.136219335124308	2.124874375	-0.189473316518517	0.852008254606964	0.999996701290797	-4.83979470975338
GSE133767	10593260	Ankk1	-0.0218425000000004	-0.300146313602741	0.25646131360274	2.21145	-0.165829321624184	0.870284560541747	0.999996701290797	-4.84155299890399
GSE133767	10572605	Ankle1	-0.0495487499999996	-0.294024316173882	0.194926816173883	3.278419375	-0.428228314406206	0.673963021622543	0.999996701290797	-4.80915640124826
GSE133767	10524150	Ankle2	-0.2253825	-0.509817906325133	0.0590529063251324	3.318775	-1.67422827831781	0.112730796942678	0.999996701290797	-4.32858493014762
GSE133767	10356689	Ankmy1	0.0740900000000004	-0.114009559836079	0.26218955983608	2.34052	0.832242620142873	0.417028266593204	0.999996701290797	-4.70659173563427
GSE133767	10395376	Ankmy2	0.0120575000000005	-0.181793255720062	0.205908255720063	2.0634075	0.131421950784845	0.89701361079062	0.999996701290797	-4.84369556699372
GSE133767	10406825	Ankra2	-0.13957375	-0.359884243341042	0.080736743341042	2.352730625	-1.33858730328929	0.198664805855198	0.999996701290797	-4.50093621437772
GSE133767	10467191	Ankrd1	0.00727249999999957	-0.184248535102019	0.198793535102018	1.79984	0.0802315877707132	0.937007794374833	0.999996701290797	-4.84596758904604
GSE133767	10577048	Ankrd10	-0.1351575	-0.364662387236828	0.094347387236828	3.43789375	-1.24430357581974	0.230588861648047	0.999996701290797	-4.54476061118405
GSE133767	10582445	Ankrd11	-0.17922625	-0.434623918333351	0.0761714183333518	3.155403125	-1.48273256928656	0.156792123278328	0.999996701290797	-4.4298103047923
GSE133767	10452516	Ankrd12	-0.20705375	-0.415133113291438	0.00102561329143791	1.510585625	-2.10248171509241	0.0510152246016088	0.999996701290797	-4.08147054096725
GSE133767	10524588	Ankrd13a	0.205305000000001	-0.12682179510854	0.537431795108541	3.1046875	1.30609193831421	0.209246054810255	0.999996701290797	-4.51629401298565
GSE133767	10388648	Ankrd13b	-0.0519487500000002	-0.284212454277663	0.180314954277663	3.404643125	-0.472576249260128	0.642639556865552	0.999996701290797	-4.80093113233658
GSE133767	10497090	Ankrd13c	-0.11556375	-0.362565735630113	0.131438235630113	2.126445625	-0.988551544140293	0.337006188790406	0.999996701290797	-4.65135686176914
GSE133767	10464688	Ankrd13d	0.0228937500000002	-0.192745744907414	0.238533244907414	3.302743125	0.224319365241721	0.825233429471288	0.999996701290797	-4.83678009485714
GSE133767	10469300	Ankrd16	-0.1793275	-0.371846803823907	0.0131918038239066	2.60522125	-1.96811625722646	0.0659061565620764	0.999996701290797	-4.16143920424806
GSE133767	10531215	Ankrd17	-0.0280437500000001	-0.353236481611722	0.297148981611721	2.445523125	-0.182210497553617	0.857613546320276	0.999996701290797	-4.84035955700856
GSE133767	10463189	Ankrd2	-0.25550125	-0.521840055643039	0.0108375556430384	3.146504375	-2.02692051619588	0.058962624101751	0.999996701290797	-4.12666441453147
GSE133767	10467115	Ankrd22	0.0521862500000001	-0.15566941284109	0.26004191284109	2.348158125	0.530484094195536	0.602767767019475	0.999996701290797	-4.78902727565939
GSE133767	10353878	Ankrd23	-0.0723262500000001	-0.244157161986107	0.0995046619861063	2.853251875	-0.889350165806856	0.386461286998599	0.999996701290797	-4.6873468476811
GSE133767	10365174	Ankrd24	-0.0649000000000006	-0.280830622250632	0.15103062225063	3.216915	-0.635050990574576	0.534010072555165	0.999996701290797	-4.7642619347612
GSE133767	10547288	Ankrd26	-0.11653625	-0.355840297423122	0.122767797423122	2.083660625	-1.02893782361422	0.318198718311614	0.999996701290797	-4.63580805959004
GSE133767	10552210	Ankrd27	0.114007499999999	-0.110250237281982	0.33826523728198	2.74659125	1.07414799906702	0.298049590505855	0.999996701290797	-4.61780906887012
GSE133767	10418766	Ankrd28	0.0719974999999997	-0.1469809265145	0.290975926514499	2.15415	0.69469507978859	0.496809583022632	0.999996701290797	-4.74829797838204
GSE133767	10457536	Ankrd29	0.0554399999999999	-0.196179769027185	0.307059769027185	3.0293525	0.465539568282052	0.647565545264068	0.999996701290797	-4.80228813665284
GSE133767	10410743	Ankrd32	-0.00998624999999964	-0.178379720566741	0.158407220566742	1.581948125	-0.125301226955488	0.90178282252404	0.999996701290797	-4.8440249288988
GSE133767	10426991	Ankrd33	-0.0326662500000001	-0.235277872518354	0.169945372518354	4.113326875	-0.340653663877303	0.737616981521592	0.999996701290797	-4.82309133631259
GSE133767	10428008	Ankrd33b	0.136558750000001	-0.110974903346036	0.384092403346039	3.524746875	1.16563725209863	0.260158751156098	0.999996701290797	-4.57954156239405
GSE133767	10494441	Ankrd34a	0.00584249999999953	-0.287741405091023	0.299426405091022	2.80046	0.042047929501786	0.96695969840981	0.999996701290797	-4.84694742550315
GSE133767	10406590	Ankrd34b	-0.0251625000000004	-0.215586990559128	0.165261990559127	4.07392125	-0.279195955534922	0.783526499877528	0.999996701290797	-4.83101482188355
GSE133767	10595668	Ankrd34c	0.0597550000000009	-0.16220802543688	0.281718025436882	2.1054875	0.56881593219603	0.577060109092029	0.999996701290797	-4.78043248450836
GSE133767	10494500	Ankrd35	0.187283749999999	-0.178116391808198	0.552683891808196	2.525133125	1.08295278474606	0.294236007631646	0.999996701290797	-4.61423230364341
GSE133767	10374060	Ankrd36	-0.01920375	-0.275131266354867	0.236723766354868	2.025500625	-0.15854304634161	0.875932499909184	0.999996701290797	-4.84204793010287
GSE133767	10578515	Ankrd37	-0.00180750000000041	-0.193503103814279	0.189888103814278	3.00223	-0.0199225208486702	0.984341547036743	0.999996701290797	-4.8472352477695
GSE133767	10353891	Ankrd39	-0.1020925	-0.286439366828853	0.0822543668288519	3.054745	-1.17013566165179	0.25839379418636	0.999996701290797	-4.57759836496413
GSE133767	10380384	Ankrd40	0.106859999999999	-0.211949996958288	0.425669996958287	2.89162875	0.70820889308086	0.488594720195155	0.999996701290797	-4.74449954275998
GSE133767	10565532	Ankrd42	0.0193799999999991	-0.182536981489727	0.221296981489725	2.0966675	0.202795850638377	0.841747610238975	0.999996701290797	-4.83870161450574
GSE133767	10354677	Ankrd44	0.122349999999999	-0.0580725987963542	0.302772598796352	2.31838875	1.43281848861546	0.170385405302869	0.999996701290797	-4.45497270703954
GSE133767	10351056	Ankrd45	0.135215000000001	-0.190459134941874	0.460889134941875	2.2556825	0.877242656781604	0.392814376636004	0.999996701290797	-4.69151875150105
GSE133767	10428171	Ankrd46	0.0548550000000012	-0.143773149902606	0.253483149902609	3.16590375	0.583517061879224	0.567352189487706	0.999996701290797	-4.77698681273066
GSE133767	10590968	Ankrd49	-0.00145874999999984	-0.35812814089734	0.355210640897341	2.029616875	-0.00864158022679803	0.993207612575048	0.999996701290797	-4.84730289494432
GSE133767	10497920	Ankrd50	0.0494987500000001	-0.16647288021671	0.26547038021671	3.132711875	0.484256727178614	0.634500554808539	0.999996701290797	-4.79863558263523
GSE133767	10367305	Ankrd52	0.122201250000001	-0.207629718293598	0.4520322182936	2.197694375	0.782820798675931	0.444704641439832	0.999996701290797	-4.7223457334776
GSE133767	10539465	Ankrd53	-0.06079875	-0.304282249138641	0.182684749138641	3.908834375	-0.527598136893446	0.604725888530012	0.999996701290797	-4.78965143875563
GSE133767	10430438	Ankrd54	-0.0173700000000014	-0.288731418401695	0.253991418401692	3.22814125	-0.135247689653306	0.894034680607676	0.999996701290797	-4.84348175092574
GSE133767	10407159	Ankrd55	0.160693750000001	-0.1179139166723	0.439301416672301	2.975648125	1.21866421847194	0.23992697209912	0.999996701290797	-4.55628055856601
GSE133767	10511901	Ankrd6	-0.145615	-0.336990692652013	0.045760692652012	2.3522825	-1.60767210476978	0.126668735104746	0.999996701290797	-4.36455880779291
GSE133767	10490164	Ankrd60	0.096628749999998	-0.14585180216906	0.339109302169056	3.000818125	0.841991265731795	0.411702485516779	0.999996701290797	-4.70338472094725
GSE133767	10535497	Ankrd61	0.0537937500000001	-0.237533123263234	0.345120623263234	2.692050625	0.390148022392248	0.701364095036202	0.999996701290797	-4.81559468554387
GSE133767	10536600	Ankrd7	-0.06820125	-0.309508331872916	0.173105831872916	1.868169375	-0.597173330427943	0.558411373123008	0.999996701290797	-4.77371239043403
GSE133767	10402659	Ankrd9	-0.0313175000000001	-0.344074138419295	0.281439138419295	3.9193975	-0.211572241287319	0.835004156851034	0.999996701290797	-4.83794128021082
GSE133767	10443244	Anks1	-0.0115037500000001	-0.217765833475377	0.194758333475377	2.732735625	-0.117841475584426	0.90760061300828	0.999996701290797	-4.84440517232621
GSE133767	10365682	Anks1b	-0.0185212500000005	-0.277563442487218	0.240520942487217	2.484713125	-0.151069893809895	0.881732471434144	0.999996701290797	-4.84253256634194
GSE133767	10437454	Anks3	-0.0918262500000009	-0.292626529111055	0.108974029111053	3.138525625	-0.966230348252465	0.347729859842739	0.999996701290797	-4.65973126447576
GSE133767	10556828	Anks4b	-0.0347862500000011	-0.291901420334227	0.222328920334225	2.999846875	-0.285863067308997	0.778502572565327	0.999996701290797	-4.83022995093225
GSE133767	10512830	Anks6	-0.0779337499999997	-0.256873222304782	0.101005722304782	2.786798125	-0.920232482582572	0.370568604029841	0.999996701290797	-4.67648555124327
GSE133767	10498302	Ankub1	0.1192125	-0.0754358385295346	0.313860838529535	1.20917125	1.29404456145411	0.213280471340247	0.999996701290797	-4.52192096866744
GSE133767	10347531	Ankzf1	0.00876625000000075	-0.21271566515682	0.230248165156822	2.506459375	0.0836283867388292	0.934347314610219	0.999996701290797	-4.84585081240207
GSE133767	10591781	Anln	-0.121736250000001	-0.458900144729564	0.215427644729563	2.675763125	-0.762881344566926	0.45618810089626	0.999996701290797	-4.72846020614654
GSE133767	10569618	Ano1	-0.1841575	-0.40363159894225	0.035316598942251	3.0916525	-1.77290013548172	0.0945045568683111	0.999996701290797	-4.27386581760736
GSE133767	10597883	Ano10	0.0622975000000006	-0.215634953668648	0.340229953668649	2.557025	0.473597601760579	0.64192598183507	0.999996701290797	-4.80073254696228
GSE133767	10541968	Ano2	-0.0173675000000002	-0.190061713877032	0.155326713877031	2.344905	-0.212489589754302	0.834300054656191	0.999996701290797	-4.83785996309156
GSE133767	10485718	Ano3	0.136465	-0.0864708842625812	0.359400884262581	1.95179125	1.2933600368308	0.213511532853921	0.999996701290797	-4.52223958987076
GSE133767	10371740	Ano4	-0.0469949999999999	-0.232108648719899	0.138118648719899	2.134435	-0.536403187662963	0.598761444697922	0.999996701290797	-4.78773703811228
GSE133767	10553477	Ano5	-0.0569762499999993	-0.233626621361922	0.119674121361923	1.858051875	-0.681486794044367	0.504915867724987	0.999996701290797	-4.75194617244179
GSE133767	10426479	Ano6	-0.0490749999999998	-0.288933304239151	0.190783304239152	2.0279075	-0.432298458156052	0.671061207791236	0.999996701290797	-4.80843400852269
GSE133767	10348791	Ano7	-0.240985000000001	-0.508538410747902	0.0265684107479008	3.5583375	-1.90308267900789	0.0744339005542602	0.999996701290797	-4.19944224232565
GSE133767	10579508	Ano8	-0.14729375	-0.36189135141269	0.0673038514126894	2.297924375	-1.4502323644452	0.165537193535951	0.999996701290797	-4.44625603683034
GSE133767	10569038	Ano9	-0.10010875	-0.35905360644187	0.158836106441871	2.081945625	-0.81685107902542	0.425526662643733	0.999996701290797	-4.71158873422835
GSE133767	10385081	Anp32-ps	0.0853999999999995	-0.388836518209511	0.55963651820951	3.9482625	0.38048804395204	0.708384922125265	0.999996701290797	-4.81713546942835
GSE133767	10586064	Anp32a	0.0355112499999999	-0.856638311886373	0.927660811886373	5.933438125	0.084102020677296	0.933976412480696	0.999996701290797	-4.84583414551077
GSE133767	10504730	Anp32b	0.0786875000000018	-1.14392158572847	1.30129658572847	6.98063625	0.135986647074412	0.893459474420601	0.999996701290797	-4.84343974698273
GSE133767	10504730	Anp32b-ps1	0.0786875000000018	-1.14392158572847	1.30129658572847	6.98063625	0.135986647074412	0.893459474420601	0.999996701290797	-4.84343974698273
GSE133767	10494322	Anp32e	0.278105	-0.816813138400872	1.37302313840087	3.804325	0.536667485507931	0.598582863307871	0.999996701290797	-4.78767911097226
GSE133767	10564818	Anpep	0.17150375	-0.0311824189347269	0.374189918934727	2.399510625	1.78783585919437	0.0919826186928792	0.999996701290797	-4.26544942344316
GSE133767	10545974	Antxr1	0.0113987500000001	-0.237819570232988	0.260617070232988	2.737115625	0.0966396618153891	0.924164162814593	0.999996701290797	-4.84535878271258
GSE133767	10531560	Antxr2	-0.18188	-0.368164127788186	0.00440412778818491	1.8292425	-2.06294300803493	0.055043230225244	0.999996701290797	-4.10518626176965
GSE133767	10414047	Antxrl	-0.129392500000001	-0.303329915901723	0.0445449159017215	2.0226575	-1.57178893650688	0.134773525376823	0.999996701290797	-4.38361526526486
GSE133767	10466606	Anxa1	-0.18653375	-0.491134467989357	0.118066967989357	1.683761875	-1.29391168760142	0.213325307536719	0.999996701290797	-4.52198282586575
GSE133767	10578857	Anxa10	0.0655874999999999	-0.245532620872536	0.376707620872536	2.06293625	0.445421437937267	0.661741773450333	0.999996701290797	-4.80606002863166
GSE133767	10413229	Anxa11	-0.10657125	-0.364163903824638	0.151021403824638	2.764039375	-0.874147507557792	0.394449509890794	0.999996701290797	-4.69257738583429
GSE133767	10428814	Anxa13	-0.0184875	-0.216215757574635	0.179240757574635	1.9739575	-0.197554799439326	0.845780730951993	0.999996701290797	-4.83914042878602
GSE133767	10586744	Anxa2	-0.0726662500000002	-0.267102608756492	0.121770108756492	4.225738125	-0.789647757829503	0.44081459151573	0.999996701290797	-4.72022010470163
GSE133767	10523451	Anxa3	-0.134757500000001	-0.418138168106	0.148623168105999	2.2575575	-1.00475658882494	0.329367710545423	0.999996701290797	-4.64517880344429
GSE133767	10545958	Anxa4	0.0127975	-0.345132026646407	0.370727026646407	2.4397725	0.075545004152015	0.940679728672695	0.999996701290797	-4.8461207678541
GSE133767	10497817	Anxa5	-0.0190224999999997	-0.273556202461342	0.235511202461343	2.58111625	-0.15790665551352	0.876426129322085	0.999996701290797	-4.84209010727783
GSE133767	10385966	Anxa6	-0.145305	-0.35834260445785	0.0677326044578512	3.7629275	-1.44112756808505	0.168057757584474	0.999996701290797	-4.45082191154286
GSE133767	10417869	Anxa7	-0.0666974999999996	-0.356382221925857	0.222987221925857	3.6575425	-0.486476764537509	0.632959024549869	0.999996701290797	-4.79819322336583
GSE133767	10414065	Anxa8	-0.1170225	-0.314670145769491	0.0806251457694905	1.92452625	-1.25099583399348	0.22819845727855	0.999996701290797	-4.54172509344871
GSE133767	10500140	Anxa9	0.132064999999999	-0.205265501091998	0.469395501091997	2.08534625	0.827199496718866	0.41980071115177	0.999996701290797	-4.70823800196045
GSE133767	10403871	Aoah	-0.0283874999999998	-0.180942952966784	0.124167952966784	1.9681275	-0.393167443632171	0.699175257284717	0.999996701290797	-4.81510538760432
GSE133767	10538163	Aoc1	0.0892724999999999	-0.190489654418443	0.369034654418442	2.23890375	0.674228133694125	0.509402936302379	0.999996701290797	-4.75392383339132
GSE133767	10381361	Aoc2	0.15191125	-0.0502529697012727	0.354075469701273	3.760910625	1.58768294914942	0.131131071833987	0.999996701290797	-4.37520466954348
GSE133767	10381371	Aoc3	-0.100075	-0.388736486935098	0.188586486935098	2.3230225	-0.732512249538456	0.474024040589057	0.999996701290797	-4.73750198159265
GSE133767	10346374	Aox1	0.0300824999999993	-0.187619134392358	0.247784134392357	2.7838975	0.291964718074617	0.773913578861736	0.999996701290797	-4.82949567239472
GSE133767	10346485	Aox2	0.0496687500000004	-0.163742850650814	0.263080350650815	2.005966875	0.491748840389378	0.629305225215891	0.999996701290797	-4.79713498215801
GSE133767	10346410	Aox3	-0.0499412499999994	-0.232868092132374	0.132985592132375	2.041169375	-0.576846296023436	0.57174664935851	0.999996701290797	-4.77856052734245
GSE133767	10346448	Aox4	0.10056	-0.0985321986956912	0.299652198695692	2.32807125	1.06720821378457	0.301080705183632	0.999996701290797	-4.62061194391801
GSE133767	10502058	Ap1ar	-0.19453375	-0.527329583345973	0.138262083345974	2.950739375	-1.23508036011505	0.23391507965994	0.999996701290797	-4.54892479166193
GSE133767	10373986	Ap1b1	-0.000325000000000131	-0.216498094475335	0.215848094475335	3.0007775	-0.00317658045042501	0.997503140545934	0.999996701290797	-4.84731645407681
GSE133767	10575302	Ap1g1	0.0814662499999992	-0.226300327995971	0.389232827995969	2.952995625	0.559286591001832	0.583398200386134	0.999996701290797	-4.78262188562
GSE133767	10419977	Ap1g2	0.0167975000000009	-0.149166496114236	0.182761496114237	4.135545	0.213849827223752	0.833256284378274	0.999996701290797	-4.83773874470527
GSE133767	10572786	Ap1m1	0.0503749999999998	-0.139809586331826	0.240559586331825	3.5826825	0.559651768077964	0.583154664423387	0.999996701290797	-4.78253862569248
GSE133767	10591522	Ap1m2	-0.0566450000000005	-0.237316352668271	0.12402635266827	3.3286025	-0.662445908841036	0.516734635109532	0.999996701290797	-4.75709268623919
GSE133767	10534660	Ap1s1	-0.0646112500000005	-0.294165916338586	0.164943416338585	3.354638125	-0.594703035186186	0.560023133379623	0.999996701290797	-4.77430994324154
GSE133767	10603051	Ap1s2	-0.2157025	-0.559130813971098	0.127725813971098	1.58160625	-1.32708034845878	0.202361909728109	0.999996701290797	-4.50640436519804
GSE133767	10355967	Ap1s3	-0.0522649999999991	-0.224763771858976	0.120233771858977	1.57936625	-0.640181448260992	0.53075066736365	0.999996701290797	-4.76294053113822
GSE133767	10562965	Ap2a1	-0.135825000000001	-0.280638782499352	0.00898878249935109	3.28076	-1.98174583272973	0.0642342423712196	0.999996701290797	-4.15341241067381
GSE133767	10558971	Ap2a2	0.0804412499999994	-0.354433757222728	0.515316257222727	3.651325625	0.390834145277036	0.700866472522736	0.999996701290797	-4.8154838206873
GSE133767	10379654	Ap2b1	0.0396787500000002	-0.244743740637772	0.324101240637772	2.802426875	0.294762468059693	0.771812287910518	0.999996701290797	-4.82915388758598
GSE133767	10434384	Ap2m1	0.16157375	-0.30010173681743	0.623249236817429	4.081688125	0.7394556407332	0.469909572337642	0.999996701290797	-4.73546376372079
GSE133767	10550326	Ap2s1	0.06063375	-0.312968046068091	0.434235546068091	3.683309375	0.342912732232655	0.735947540433128	0.999996701290797	-4.82277075356136
GSE133767	10406681	Ap3b1	-0.25167125	-0.684384442584427	0.181041942584428	3.063001875	-1.22888603015952	0.236169732801142	0.999996701290797	-4.55170880447179
GSE133767	10565102	Ap3b2	0.0166087500000018	-0.179418521240638	0.212636021240642	3.847278125	0.179018779057132	0.860079349297943	0.999996701290797	-4.84060084736881
GSE133767	10370950	Ap3d1	-0.15415125	-0.36845706184637	0.0601545618463701	2.573261875	-1.51981679339262	0.147284299124446	0.999996701290797	-4.41077065353487
GSE133767	10365227	Ap3m1	-0.0401124999999998	-0.459772826380819	0.37954782638082	2.86071375	-0.201957484800746	0.842392452380831	0.999996701290797	-4.83877257378104
GSE133767	10365227	Ap3m1-ps	-0.0401124999999998	-0.459772826380819	0.37954782638082	2.86071375	-0.201957484800746	0.842392452380831	0.999996701290797	-4.83877257378104
GSE133767	10577586	Ap3m2	0.0525787499999999	-0.124784142147385	0.229941642147385	3.439403125	0.626362332006471	0.539555104434991	0.999996701290797	-4.7664773660801
GSE133767	10574096	Ap3s1	0.38053375	-0.0374361701184323	0.798503670118432	2.850950625	1.92365103269088	0.0716358385240771	0.999996701290797	-4.18747771568176
GSE133767	10574096	Ap3s1-ps1	0.38053375	-0.0374361701184323	0.798503670118432	2.850950625	1.92365103269088	0.0716358385240771	0.999996701290797	-4.18747771568176
GSE133767	10574096	Ap3s1-ps2	0.38053375	-0.0374361701184323	0.798503670118432	2.850950625	1.92365103269088	0.0716358385240771	0.999996701290797	-4.18747771568176
GSE133767	10564839	Ap3s2	-0.1549975	-0.533867044893938	0.223872044893938	2.29288375	-0.864396767928807	0.399630060852157	0.999996701290797	-4.69589140142327
GSE133767	10494957	Ap4b1	0.02983	-0.242972962303893	0.302632962303893	3.36428625	0.231037410728261	0.820095779991088	0.999996701290797	-4.8361410576505
GSE133767	10475686	Ap4e1	-0.0489900000000001	-0.249621591758251	0.151641591758251	1.67769875	-0.515924625950648	0.612677983850889	0.999996701290797	-4.79214319698374
GSE133767	10526754	Ap4m1	0.23089	0.0200234723113921	0.441756527688609	2.04431	2.31353255127473	0.0337293659912355	0.999996701290797	-3.95284211784214
GSE133767	10395672	Ap4s1	-0.0746787500000008	-0.420319365669328	0.270961865669326	3.805158125	-0.456510117559292	0.653911311042108	0.999996701290797	-4.80400083480334
GSE133767	10460623	Ap5b1	0.150003750000001	-0.144960876955869	0.44496837695587	3.687216875	1.07450964051936	0.297892247224841	0.999996701290797	-4.61766261336126
GSE133767	10414449	Ap5m1	-0.151438750000001	-0.429926852026587	0.127049352026586	1.510425625	-1.14896952085848	0.266777760652196	0.999996701290797	-4.58669212656709
GSE133767	10476270	Ap5s1	0.0430700000000006	-0.179719951927404	0.265859951927406	3.372805	0.40846740777218	0.688126290718215	0.999996701290797	-4.81256980955261
GSE133767	10527115	Ap5z1	-0.0396425000000011	-0.227365397428584	0.148080397428582	3.94982375	-0.446192147982708	0.661196200884202	0.999996701290797	-4.80591848055361
GSE133767	10371846	Apaf1	0.0120912499999997	-0.169236091261191	0.19341859126119	2.155346875	0.140891906001791	0.889642776248403	0.999996701290797	-4.84315514054395
GSE133767	10462113	Apba1	0.00210749999999926	-0.235741685009655	0.239956685009653	3.478195	0.0187216470270319	0.985285274150505	0.999996701290797	-4.84724499002169
GSE133767	10553917	Apba2	-0.109417499999999	-0.307392933744007	0.0885579337440085	2.22506875	-1.16776007204533	0.259324727818108	0.999996701290797	-4.57862526257733
GSE133767	10365056	Apba3	0.0117424999999995	-0.195090494919527	0.218575494919526	4.039685	0.119955146530053	0.905951615938592	0.999996701290797	-4.84429979515478
GSE133767	10566457	Apbb1	0.00284500000000021	-0.211842373428871	0.217532373428872	3.08916375	0.0279997339852798	0.977994625036609	0.999996701290797	-4.84715398946297
GSE133767	10469695	Apbb1ip	0.1376675	-0.0600242205642633	0.335359220564263	2.06322	1.47136723877989	0.159805844761729	0.999996701290797	-4.43558733032384
GSE133767	10530287	Apbb2	0.0726237499999995	-0.146850102366805	0.292097602366804	2.365820625	0.699155890300617	0.494089056878497	0.999996701290797	-4.7470514892356
GSE133767	10454655	Apc	0.074805	-0.225026385347451	0.374636385347451	3.178785	0.527146919724033	0.605032320800447	0.999996701290797	-4.78974873465499
GSE133767	10364769	Apc2	-0.0683324999999995	-0.301567258641223	0.164902258641224	2.55582375	-0.619030680458809	0.544258494824929	0.999996701290797	-4.76832479450236
GSE133767	10456184	Apcdd1	-0.145068750000001	-0.329935165240044	0.0397976652400421	2.805148125	-1.6580361161125	0.115994626895069	0.999996701290797	-4.33740948881157
GSE133767	10360328	Apcs	-0.0361587500000005	-0.278174459194325	0.205856959194324	1.511451875	-0.31568066951845	0.756160305696138	0.999996701290797	-4.82649697219208
GSE133767	10596857	Apeh	0.000365000000000393	-0.214064585626688	0.214794585626689	4.12541375	0.00359655159870994	0.997173035756887	0.999996701290797	-4.84731585690107
GSE133767	10414522	Apex1	0.22588375	-0.34936147599613	0.801128975996129	3.633146875	0.829679010299832	0.418436129011379	0.999996701290797	-4.70742968539463
GSE133767	10607250	Apex2	0.0526712499999999	-0.164602586656726	0.269945086656726	2.014245625	0.512205608077991	0.6152219759644	0.999996701290797	-4.7929259207235
GSE133767	10494312	Aph1a	0.115397499999999	-0.0794743890320173	0.310269389032016	3.69553875	1.25119598592848	0.228127262925114	0.999996701290797	-4.54163412620634
GSE133767	10594631	Aph1b	-0.0939899999999998	-0.296793376626659	0.108813376626659	3.34146125	-0.979229763378833	0.341456089111727	0.999996701290797	-4.65487335702738
GSE133767	10594638	Aph1c	-0.143617500000001	-0.377905306361235	0.0906703063612321	4.27341	-1.29519695199625	0.212891926631654	0.999996701290797	-4.52138430523109
GSE133767	10485344	Api5	-0.0160724999999995	-0.457847893821626	0.425702893821627	3.8515325	-0.0768705607232341	0.939641012805907	0.999996701290797	-4.84607837635981
GSE133767	10474159	Apip	-0.00862750000000068	-0.274642811468454	0.257387811468453	3.12762375	-0.0685261717633519	0.946181528369596	0.999996701290797	-4.84633295468941
GSE133767	10518561	Apitd1	0.2418125	-0.199521621003089	0.683146621003089	3.40655625	1.15768226134043	0.263302173087486	0.999996701290797	-4.58296405248267
GSE133767	10546031	Aplf	-0.1090225	-0.369229997393474	0.151184997393474	2.567345	-0.88526739286225	0.388595923419596	0.999996701290797	-4.68875912165817
GSE133767	10604375	Apln	-0.0329399999999995	-0.25915033805511	0.193270338055111	3.5393875	-0.307672927131172	0.762139602043643	0.999996701290797	-4.82753519625391
GSE133767	10473444	Aplnr	0.0443687500000003	-0.367443007927824	0.456180507927824	2.501704375	0.227644199370039	0.822689712804312	0.999996701290797	-4.83646616167698
GSE133767	10561927	Aplp1	-0.10046625	-0.319336786052133	0.118404286052133	2.859493125	-0.969864421086183	0.345967971961098	0.999996701290797	-4.65837860995354
GSE133767	10592023	Aplp2	0.0700725000000006	-0.226881649704403	0.367026649704405	3.6272875	0.498581719345997	0.624584432021974	0.999996701290797	-4.79574726173557
GSE133767	10488472	Apmap	0.0284350000000009	-0.209804056171105	0.266674056171107	2.94307625	0.252184511576153	0.803979483124183	0.999996701290797	-4.83400775515808
GSE133767	10585005	Apoa1	-0.0538137499999993	-0.252307201136913	0.144679701136914	3.712443125	-0.572829283503803	0.574401414541162	0.999996701290797	-4.77950000938102
GSE133767	10499309	Apoa1bp	0.0722349999999992	-0.276413193506859	0.420883193506857	4.478685	0.437762337911938	0.667174142168957	0.999996701290797	-4.8074538886142
GSE133767	10351546	Apoa2	-0.182957500000001	-0.378905101776914	0.0129901017769127	2.89057	-1.97282427010375	0.0653242585323937	0.999996701290797	-4.15866888128494
GSE133767	10585010	Apoa4	0.0811487500000005	-0.186765012628732	0.349062512628733	3.168449375	0.639977857218365	0.530879799407183	0.999996701290797	-4.76299315518202
GSE133767	10585015	Apoa5	-0.0324987500000007	-0.273537035294273	0.208539535294272	3.292436875	-0.284877903847787	0.779244301292711	0.999996701290797	-4.83034707533897
GSE133767	10394394	Apob	0.0362562500000005	-0.180796009699194	0.253308509699195	2.216321875	0.352936608844145	0.728556461441596	0.999996701290797	-4.82132330140839
GSE133767	10547621	Apobec1	-0.10174875	-0.323950197208135	0.120452697208136	2.821888125	-0.967520858500665	0.347103476474719	0.999996701290797	-4.65925139935551
GSE133767	10451665	Apobec2	0.0626912499999999	-0.158083105923107	0.283465605923107	3.729585625	0.599979539228359	0.556583435459007	0.999996701290797	-4.77303077949852
GSE133767	10425333	Apobec3	-0.0999325	-0.316531144974859	0.116666144974859	3.2017575	-0.97483060193258	0.343570302650847	0.999996701290797	-4.65652333585758
GSE133767	10350681	Apobec4	-0.03227	-0.275085218693623	0.210545218693623	1.62508375	-0.280802648410417	0.782314883166785	0.999996701290797	-4.83082734568206
GSE133767	10557434	Apobr	0.11556	-0.0788125190437753	0.309932519043776	4.38253	1.2561769129775	0.226361098548351	0.999996701290797	-4.5393669640431
GSE133767	10560618	Apoc1	0.0775862499999995	-0.52744658683519	0.682619086835189	2.785326875	0.270946754395901	0.789756238572566	0.999996701290797	-4.83196068151139
GSE133767	10560608	Apoc2	0.0736237499999994	-0.175781409967429	0.323028909967427	2.454355625	0.623721388719362	0.541246754684273	0.999996701290797	-4.76714515343725
GSE133767	10593169	Apoc3	-0.125678750000001	-0.385574610804929	0.134217110804928	2.995250625	-1.02174054377578	0.321494403651083	0.999996701290797	-4.6386160325429
GSE133767	10560614	Apoc4	-0.0177349999999992	-0.254807105642307	0.219337105642309	3.72419875	-0.158062509578422	0.876305233102991	0.999996701290797	-4.84207979356836
GSE133767	10439009	Apod	-0.0791462499999998	-0.313561754869906	0.155269254869907	1.872863125	-0.713381998431257	0.485471331328041	0.999996701290797	-4.74302794532606
GSE133767	10560624	Apoe	0.0762850000000004	-0.328416984007069	0.48098698400707	3.9090725	0.398273998620315	0.695479630802889	0.999996701290797	-4.81426954006846
GSE133767	10367221	Apof	0.08369625	-0.188938290672198	0.356330790672198	2.093159375	0.648639303196154	0.525401509286549	0.999996701290797	-4.76074071655794
GSE133767	10382189	Apoh	0.0424187500000004	-0.207555615067273	0.292393115067274	1.789258125	0.358542407120905	0.724434970292237	0.999996701290797	-4.82049607314016
GSE133767	10425037	Apol10a	-0.34260125	-0.662280086571045	-0.0229224134289556	1.391716875	-2.26440025151718	0.037182575696805	0.999996701290797	-3.98304600677502
GSE133767	10430190	Apol10b	-0.15694625	-0.300148287829166	-0.0137442121708345	1.707180625	-2.31568713221376	0.0335849992670951	0.999996701290797	-3.95151466570731
GSE133767	10425031	Apol6	0.14356125	-0.103273528228623	0.390396028228624	3.317689375	1.22887870364659	0.236172409456613	0.999996701290797	-4.55171209129194
GSE133767	10430166	Apol7a	-0.1715225	-0.487211725028231	0.14416672502823	2.015925	-1.1479936249117	0.26716919060706	0.999996701290797	-4.58710836497638
GSE133767	10430179	Apol7b	0.0101187500000002	-0.278076390837369	0.29831389083737	2.511305625	0.074185384048155	0.941745251461742	0.999996701290797	-4.84616348351529
GSE133767	10430186	Apol7c	0.38698875	-0.140339320547108	0.914316820547107	1.769248125	1.55058503108699	0.139765396529946	0.999996701290797	-4.39475924724452
GSE133767	10347210	Apol7d	-0.144973749999999	-0.396450148141596	0.106502648141598	4.202913125	-1.21806447945154	0.240148839742055	0.999996701290797	-4.55654792485123
GSE133767	10430179	Apol7e	0.0101187500000002	-0.278076390837369	0.29831389083737	2.511305625	0.074185384048155	0.941745251461742	0.999996701290797	-4.84616348351529
GSE133767	10430195	Apol8	-0.0993012499999995	-0.307060481372285	0.108457981372286	2.562133125	-1.00988639793584	0.326975406292312	0.999996701290797	-4.64320601970064
GSE133767	10425049	Apol9a	0.17598625	-0.0837375822320171	0.435710082232018	2.597456875	1.4316770797073	0.170707202339223	0.999996701290797	-4.45554169403688
GSE133767	10425049	Apol9b	0.17598625	-0.0837375822320171	0.435710082232018	2.597456875	1.4316770797073	0.170707202339223	0.999996701290797	-4.45554169403688
GSE133767	10542319	Apold1	0.08094	-0.132702536672088	0.294582536672088	3.5048175	0.800485761561381	0.434682928710951	0.999996701290797	-4.71681213964599
GSE133767	10450444	Apom	0.0847249999999997	-0.149399895433503	0.318849895433503	2.84409875	0.764613775904005	0.455183190243399	0.999996701290797	-4.72793451986203
GSE133767	10367215	Apon	-0.0836799999999998	-0.299091562074272	0.131731562074272	1.995915	-0.820787622655859	0.423342660873071	0.999996701290797	-4.71031846137262
GSE133767	10600797	Apoo	-0.123169999999999	-0.395424030671137	0.149084030671139	3.50630375	-0.95589185388025	0.35277624178051	0.999996701290797	-4.66355635246325
GSE133767	10600797	Apoo-ps	-0.123169999999999	-0.395424030671137	0.149084030671139	3.50630375	-0.95589185388025	0.35277624178051	0.999996701290797	-4.66355635246325
GSE133767	10601473	Apool	-0.1317925	-0.345128399521751	0.0815433995217511	2.4238325	-1.30528362630869	0.20951484052951	0.999996701290797	-4.51667269220174
GSE133767	10398721	Apopt1	0.02888	-0.225140769881875	0.282900769881875	3.13595	0.240218304993716	0.813088316674559	0.999996701290797	-4.83523757620831
GSE133767	10440491	App	0.0256775000000005	-0.174251615580148	0.225606615580149	3.542865	0.271365623372991	0.789439553678666	0.999996701290797	-4.83191332749601
GSE133767	10389373	Appbp2	0.51543625	-0.363431860935437	1.39430436093544	3.033860625	1.23916571585129	0.232437201585863	0.999996701290797	-4.5470830732952
GSE133767	10418251	Appl1	0.1088925	-0.246465665454963	0.464250665454963	2.3481225	0.647455324505731	0.526148498421112	0.999996701290797	-4.7610502605733
GSE133767	10371356	Appl2	-0.0233637500000001	-0.194665235899023	0.147937735899023	2.030213125	-0.288177160384426	0.776761161563987	0.999996701290797	-4.82995326702584
GSE133767	10582390	Aprt	-0.188592499999999	-0.408691985497746	0.0315069854977475	4.66196125	-1.81043746177152	0.0882784927832911	0.999996701290797	-4.25265037505796
GSE133767	10512098	Aptx	-0.0160175000000007	-0.255374345103687	0.223339345103686	1.91556625	-0.141392709858658	0.889253264775191	0.999996701290797	-4.84312551836067
GSE133767	10538459	Aqp1	0.04188875	-0.127995689851252	0.211773189851252	3.351291875	0.520981060567591	0.609227298200996	0.999996701290797	-4.79107037170055
GSE133767	10565627	Aqp11	-0.1921275	-0.393512898910443	0.00925789891044387	2.386815	-2.01576402112004	0.0602268158618978	0.999996701290797	-4.13329011615306
GSE133767	10348697	Aqp12	-0.174233750000001	-0.507578686215568	0.159111186215566	3.820380625	-1.10437498004481	0.285107003293706	0.999996701290797	-4.60543433502118
GSE133767	10426760	Aqp2	-0.01427625	-0.226087110715319	0.197534610715319	3.805630625	-0.14241117075977	0.88846122405938	0.999996701290797	-4.84306495417212
GSE133767	10512156	Aqp3	-0.0720350000000005	-0.276431300973501	0.1323613009735	4.1248725	-0.744643950783549	0.466849229877347	0.999996701290797	-4.73392948041862
GSE133767	10457614	Aqp4	-0.00793374999999985	-0.166429202685503	0.150561702685503	2.312664375	-0.105764480849291	0.91703068852038	0.999996701290797	-4.84497142798766
GSE133767	10426767	Aqp5	-0.16073	-0.407532470868239	0.0860724708682396	3.53347375	-1.37602263726797	0.187009200853784	0.999996701290797	-4.48292531069063
GSE133767	10426773	Aqp6	0.077341249999999	-0.130612964652732	0.28529546465273	2.839593125	0.785817321264035	0.442994573849306	0.999996701290797	-4.72141475293045
GSE133767	10512145	Aqp7	-0.0425225	-0.245431558653018	0.160386558653018	2.58405875	-0.442787641588839	0.66360767265535	0.999996701290797	-4.80654197225686
GSE133767	10557300	Aqp8	-0.0660762499999992	-0.350879779257531	0.218727279257533	2.073086875	-0.490205475799573	0.630373830515617	0.999996701290797	-4.79744590217668
GSE133767	10594825	Aqp9	0.0266337499999989	-0.208768138283806	0.262035638283803	2.782911875	0.239056476420162	0.813974211697166	0.999996701290797	-4.83535383498923
GSE133767	10485989	Aqr	-0.15777375	-0.320914169991647	0.00536666999164809	2.743178125	-2.04339021458073	0.05714027293395	0.999996701290797	-4.11686027227483
GSE133767	10600901	Ar	0.0475675	-0.214414110841193	0.309549110841193	1.8867325	0.383634499902663	0.706095081396478	0.999996701290797	-4.8166377262197
GSE133767	10598956	Araf	0.108182499999999	-0.0962446804029179	0.312609680402917	3.27903125	1.11814084439986	0.279352086216653	0.999996701290797	-4.5997099391878
GSE133767	10555470	Arap1	0.00500874999999956	-0.209770745475886	0.219788245475885	2.572348125	0.0492736432518608	0.961286409199527	0.999996701290797	-4.84680892218791
GSE133767	10530100	Arap2	0.00300124999999984	-0.299628817173566	0.305631317173566	1.675540625	0.0209540625544706	0.983530911498706	0.999996701290797	-4.84722639584784
GSE133767	10458498	Arap3	0.09247125	-0.100676984327793	0.285619484327793	3.560285625	1.01156576587865	0.326194910431498	0.999996701290797	-4.64255840463164
GSE133767	10429491	Arc	-0.0018912499999999	-0.255727654206766	0.251945154206766	3.242649375	-0.0157424807632612	0.98762659664682	0.999996701290797	-4.84726654478094
GSE133767	10592919	Arcn1	0.169892500000001	-0.437754795995734	0.777539795995736	3.1616825	0.590745979685488	0.562610062966598	0.999996701290797	-4.77526231792407
GSE133767	10523182	Areg	-0.12604125	-0.320582129328589	0.0684996293285886	2.444498125	-1.36892597531075	0.189175465636519	0.999996701290797	-4.48636536867593
GSE133767	10401564	Arel1	-0.103190000000001	-0.359700436833143	0.153320436833142	3.008895	-0.849983919286785	0.407369036440615	0.999996701290797	-4.70073119061333
GSE133767	10386370	Arf1	0.0283412499999995	-0.30276036347391	0.359442863473909	5.671859375	0.180857215955979	0.858658857636846	0.999996701290797	-4.84046238100167
GSE133767	10381744	Arf2	0.0105037499999998	-0.182692050446363	0.203699550446363	2.379310625	0.114874816860098	0.909915807305753	0.999996701290797	-4.84454992371792
GSE133767	10432256	Arf3	0.36571625	-0.0946484324812231	0.826080932481223	4.080213125	1.678496331751	0.111883757144868	0.999996701290797	-4.32625132532781
GSE133767	10413304	Arf4	0.271942499999999	-0.0690799542801842	0.612964954280183	3.26227625	1.68489269510386	0.110624593107214	0.999996701290797	-4.32274820211001
GSE133767	10536746	Arf5	-0.34901375	-0.597200938535242	-0.100826561464758	4.187785625	-2.97126450562491	0.00869681917713064	0.999996701290797	-3.54378938537322
GSE133767	10396108	Arf6	0.15160625	-0.786624171915581	1.08983667191558	6.758535625	0.341417463941924	0.737052385030395	0.999996701290797	-4.82298317780913
GSE133767	10479490	Arfgap1	0.0092087499999991	-0.374088906934186	0.392506406934184	2.681953125	0.0507624594607965	0.960117716655859	0.999996701290797	-4.84677766232991
GSE133767	10473874	Arfgap2	0.0643199999999999	-0.223564237478988	0.352204237478988	2.9421825	0.47206987440391	0.642993472829008	0.999996701290797	-4.80102943646701
GSE133767	10430974	Arfgap3	-0.0658312500000005	-0.276320610208538	0.144658110208537	3.046978125	-0.660815301504177	0.517753995691099	0.999996701290797	-4.75752720626902
GSE133767	10353064	Arfgef1	-0.00090875000000068	-0.212656500217886	0.210839000217884	2.237705625	-0.0090678380772247	0.992872578211931	0.999996701290797	-4.84730131017139
GSE133767	10478774	Arfgef2	0.2439425	-0.0641413579216024	0.552026357921602	3.46052375	1.6730027835146	0.112975026320542	0.999996701290797	-4.32925440346911
GSE133767	10499080	Arfip1	0.0431437500000007	-0.142337364464618	0.228624864464619	1.495336875	0.491469228500477	0.629498762031779	0.999996701290797	-4.79719138081552
GSE133767	10566502	Arfip2	0.0153737499999993	-0.22618350564582	0.256931005645819	2.897584375	0.134473858027742	0.894637098198746	0.999996701290797	-4.84352549272369
GSE133767	10490672	Arfrp1	0.0664312499999995	-0.219126305168283	0.351988805168282	2.987041875	0.491537783318569	0.629451308397383	0.999996701290797	-4.79717755591036
GSE133767	10368343	Arg1	0.03537875	-0.205356962118826	0.276114462118826	2.330706875	0.31051322428467	0.760016984487117	0.999996701290797	-4.82716994072212
GSE133767	10396831	Arg2	-0.0489662500000008	-0.268178228421593	0.170245728421592	2.027789375	-0.471965986506887	0.643066093193528	0.999996701290797	-4.80104959207175
GSE133767	10576924	Arglu1	-0.150118750000001	-0.452987853003423	0.152750353003421	3.291880625	-1.0472686556008	0.309914297884172	0.999996701290797	-4.62858478947883
GSE133767	10473965	Arhgap1	0.246527499999999	-0.055655311804391	0.548710311804389	2.782	1.72374790317753	0.10323540037786	0.999996701290797	-4.30132066863743
GSE133767	10579776	Arhgap10	-0.0378425000000004	-0.199903335508843	0.124218335508842	2.31035125	-0.493378117144415	0.628178054555941	0.999996701290797	-4.79680574293023
GSE133767	10485963	Arhgap11a	-0.148842500000001	-0.604947337242814	0.307262337242813	2.80728375	-0.689509755268405	0.499982901314231	0.999996701290797	-4.74973779659094
GSE133767	10457250	Arhgap12	-0.0174125000000003	-0.259415592018406	0.224590592018406	2.04560125	-0.152026169072455	0.880989904861351	0.999996701290797	-4.84247185101221
GSE133767	10471929	Arhgap15	-0.0638675000000004	-0.262457384541236	0.134722384541235	1.99863625	-0.679517945565881	0.506130694309516	0.999996701290797	-4.75248450768497
GSE133767	10567702	Arhgap17	0.05277625	-0.166028628211108	0.271581128211108	2.532578125	0.509635491787113	0.616983022032954	0.999996701290797	-4.79346369637714
GSE133767	10362294	Arhgap18	0.0822374999999995	-0.157054387694856	0.321529387694855	1.8836425	0.726139498529559	0.477819327303435	0.999996701290797	-4.73935745966832
GSE133767	10467637	Arhgap19	-0.0397762499999992	-0.262958854576269	0.183406354576271	2.755351875	-0.376566457047046	0.711242899110491	0.999996701290797	-4.81775025126573
GSE133767	10585286	Arhgap20	0.0424512500000007	-0.181878468363112	0.266780968363113	1.820544375	0.399835921637174	0.694350833823305	0.999996701290797	-4.81401179339572
GSE133767	10593478	Arhgap20os	-0.0772225	-0.300967540178027	0.146522540178027	2.5344175	-0.729236801695001	0.475972467780375	0.999996701290797	-4.73845747814546
GSE133767	10480381	Arhgap21	0.153408749999999	-0.098954797824906	0.405772297824903	3.469539375	1.28440398472944	0.216552845921661	0.999996701290797	-4.52639735170705
GSE133767	10413951	Arhgap22	0.0363725000000001	-0.236226907319469	0.30897190731947	3.194945	0.281920321856612	0.781472378784876	0.999996701290797	-4.83069630561099
GSE133767	10380773	Arhgap23	0.0166387499999998	-0.24503730156655	0.278314801566549	2.434675625	0.134349129128611	0.894734204203289	0.999996701290797	-4.84353251977391
GSE133767	10523579	Arhgap24	0.0912787500000003	-0.128741183571504	0.311298683571504	2.157255625	0.876568363059219	0.393170215939246	0.999996701290797	-4.69174965378041
GSE133767	10546010	Arhgap25	0.0213750000000004	-0.248670812358009	0.29142081235801	2.47944125	0.1672425626736	0.869189916115117	0.999996701290797	-4.84145444121131
GSE133767	10455249	Arhgap26	-0.163397500000001	-0.404753539895973	0.0779585398959708	3.44076125	-1.43042592714514	0.171060510096011	0.999996701290797	-4.45616505271807
GSE133767	10391914	Arhgap27	-0.0551162500000006	-0.260459203718401	0.1502267037184	3.516360625	-0.567123957407031	0.578182873837382	0.999996701290797	-4.78082375918135
GSE133767	10452613	Arhgap28	-0.1878075	-0.380860463284088	0.00524546328408707	1.9912275	-2.05548634783432	0.0558345661725857	0.999996701290797	-4.10964261041684
GSE133767	10495685	Arhgap29	-0.0433612500000002	-0.253465197605856	0.166742697605855	2.426055625	-0.436059465653079	0.668384545362971	0.999996701290797	-4.80776062541636
GSE133767	10351603	Arhgap30	-0.0927825000000002	-0.27689059506346	0.0913255950634595	2.79386375	-1.06480804346521	0.302134237255022	0.999996701290797	-4.62157798488077
GSE133767	10439483	Arhgap31	0.0171850000000004	-0.304342595259631	0.338712595259632	3.43599	0.112930024235881	0.91143398740144	0.999996701290797	-4.84464281784667
GSE133767	10584124	Arhgap32	-0.20613875	-0.531076942815016	0.118799442815016	2.503285625	-1.34040801089697	0.198084793881671	0.999996701290797	-4.50006804297786
GSE133767	10561958	Arhgap33	0.0205487499999997	-0.171464959897193	0.212562459897193	2.747524375	0.226116006693664	0.823858629804474	0.999996701290797	-4.83661102267662
GSE133767	10551953	Arhgap33os	0.1001475	-0.119149793708766	0.319444793708766	3.03781125	0.964905934483243	0.348373514860633	0.999996701290797	-4.66022318445131
GSE133767	10560282	Arhgap35	0.165575000000001	-0.0794431540396361	0.410593154039639	2.87206375	1.42782386768232	0.171797208980164	0.999996701290797	-4.45746034656681
GSE133767	10599562	Arhgap36	0.00205874999999844	-0.262047466734225	0.266164966734222	2.874880625	0.0164703612710523	0.987054544811397	0.999996701290797	-4.8472616224373
GSE133767	10430113	Arhgap39	0.00401249999999953	-0.150815851465261	0.15884085146526	2.67193375	0.0547573841516594	0.956982246526154	0.999996701290797	-4.84668918745139
GSE133767	10605172	Arhgap4	0.06168	-0.186811671537695	0.310171671537695	3.69974125	0.524457940072574	0.606860045087221	0.999996701290797	-4.79032692327465
GSE133767	10478114	Arhgap40	-0.0743062499999998	-0.311168950791933	0.162556450791933	2.946393125	-0.662837094139156	0.516490257867204	0.999996701290797	-4.75698829805968
GSE133767	10590860	Arhgap42	0.170035	-0.247212289880346	0.587282289880346	1.73909125	0.861039229207654	0.401424216000099	0.999996701290797	-4.69702512841961
GSE133767	10386965	Arhgap44	-0.00199374999999957	-0.15581512131533	0.151827621315331	2.378928125	-0.0273862241791266	0.978476661625025	0.999996701290797	-4.84716112263651
GSE133767	10395692	Arhgap5	0.0647624999999998	-0.357710472900259	0.487235472900259	1.71539375	0.323893931972374	0.750044075066981	0.999996701290797	-4.82540492697238
GSE133767	10603182	Arhgap6	0.0985674999999999	-0.0619270814411306	0.25906208144113	2.03503625	1.29763187292761	0.21207279376009	0.999996701290797	-4.52024926929391
GSE133767	10425890	Arhgap8	-0.0518912500000002	-0.275436494682424	0.171653994682424	2.726875625	-0.490463659103968	0.63019500888476	0.999996701290797	-4.79739395456716
GSE133767	10366886	Arhgap9	0.087215	-0.153305262788028	0.327735262788029	2.80785375	0.766156786261083	0.454289301683395	0.999996701290797	-4.72746541689249
GSE133767	10393836	Arhgdia	0.14901625	-0.185877710355394	0.483910210355394	2.741850625	0.940165806704007	0.36054894718074	0.999996701290797	-4.66930897462751
[truncated: 238,375 more rows]
